# Supplementary material for: Mo(CO)6catalysed chemoselective hydrosilylation of α,β-unsaturated amides for the formation of allylamines
Source: Royal Society of Chemistry journal article supplement (doi:10.1039/c4cc07150f), 2014-09-29

## SUPPORTING INFORMATION

# **Mo(CO)<sub>6</sub> Catalysed Chemoselective Hydrosilylation of $\alpha,\beta$ -Unsaturated Amides for the Formation of Allylamines**

**Alexey Volkov,<sup>a</sup> Fredrik Tinnis,<sup>\*a</sup> Tove Slagbrand,<sup>a</sup> Ida Pershagen<sup>a</sup> and Hans  
Adolfsson<sup>\*a</sup>**

<sup>a</sup> Department of Organic Chemistry,

Stockholm University, the Arrhenius Laboratory, SE-106 91 Stockholm, Sweden

## Table of content

|                                     |   |
|-------------------------------------|---|
| Instrumentation .....               | 2 |
| Material .....                      | 2 |
| General .....                       | 2 |
| Substrate scope investigation ..... | 3 |
| Synthesis of Naftifine (14) .....   | 3 |
| Compound characterization .....     | 5 |
| Spectroscopic data .....            | 9 |

## Instrumentation

Characterizations were made by  $^1\text{H}$  and  $^{13}\text{C}$  NMR spectroscopy. NMR spectra were recorded at Bruker 400, 500 MHz ( $^1\text{H}$ ) and 100, 125 MHz ( $^{13}\text{C}$ ), and were referenced internally with  $\text{CDCl}_3$  ( $\delta\text{H}$  7.26,  $\delta\text{C}$  77.16 ppm)  $(\text{CD}_3)_2\text{SO}$  ( $\delta\text{H}$  2.50,  $\delta\text{C}$  39.52 ppm). High temperature experiments were performed at Bruker 500 MHz ( $^1\text{H}$ ) and 125 MHz ( $^{13}\text{C}$ ). HRMS was performed on Bruker micrOTOF/ESI.

## Material

Unless otherwise noted, materials were purchased from commercial suppliers and were used without purification.  $\text{Mo}(\text{CO})_6$ , sublimed 99,9+% was purchased from Sigma-Aldrich and used as received. THF was purchased from Fischer Scientific, and dispersed from a solvent drying system.

## General

The 1 mmol scale catalytic reduction of amides was performed in microwave tubes 2-5 mL from Biotage, with a Teflon-coated magnetic stirring bar. The tubes were fitted with a cap containing a septum and the reactions were run under nitrogen atmosphere.

## Substrate scope investigation

### General procedure for catalytic reduction of amides.

Amide (1.0 mmol) and Mo(CO)<sub>6</sub> (0.0132 g, 0.05 mmol) were added to an oven dried 10 mL microwave tube equipped with a magnetic stirring bar. To the sealed tube, dry THF (2 mL) and TMDS (0.265 mL, 1.5 mmol) were added and the reaction mixture was stirred at 65 °C for 24 h. The reaction was quenched with NaOH (Aq. 2M, 10 mL) and the stirring was continued at r.t for 8 h. The mixture was extracted with DCM (3 x 20 mL), dried with Na<sub>2</sub>SO<sub>4</sub> and evaporated under reduced pressure. The crude products were purified by column chromatography.

### Evaluation of β,γ-unsaturated amide **7**

Amide **7** (1.0 mmol) and Mo(CO)<sub>6</sub> (0.0132 g, 0.05 mmol) were added to an oven dried 10 mL microwave tube equipped with a magnetic stirring bar. To the sealed tube, dry THF (2 mL) and TMDS (0.265 mL, 1.5 mmol) were added and the reaction mixture was stirred at 65 °C for 24 h. The solvent was evaporated and 1,3,5-trimethoxybenzene (0.056 g, 0.33 mmol) was added as internal standard. The mixture was dissolved in CDCl<sub>3</sub> (3 mL) where after the <sup>1</sup>H NMR spectrum was immediately recorded.

## Synthesis of Naftifine (**14**)

### Synthesis of N-(naphthalen-1-ylmethyl)cinnamamide (**12**)

Dry THF (17 mL) was added to the carboxylic acid **10** (0.741 g, 5.0 mmol), activated molecular sieves 4Å (2.5 g) and zirconium(IV)chloride (0.118 g, 10 mol%) under nitrogen atmosphere and the mixture was heated under stirring to 100°C in a capped microwave vial. The amine **11** (0.943 g, 6.0 mmol) was added dropwise and the reaction was stirred at the same temperature for 24 h and then cooled to r.t. The mixture was filtered through a plug of silica (4 x 3.5 cm) with 150 mL of an EtOAc:Et<sub>3</sub>N (200:1) eluent. The solvent was removed under reduced pressure affording analytically pure compound **12** (1.306 g, 91 %).

### **Synthesis of N-methyl-N-(naphthalen-1-ylmethyl)cinnamamide (13)**

In 25 mL round-bottom flask to a suspension of NaH (0.12 g, 5.0 mmol) in 10 mL of dry DMF 1 g (3.5 mmol) of amide (**12**) was added drop wise as a solution in 2 mL of DMF at 0 °C and the reaction mixture was stirred for 2 h. 0.36 mL (5.9 mmol) of methyl iodide was thereafter added drop wise and the temperature was raised to r.t and the mixture was left stirring for 10 h. The reaction was quenched with 2 mL of 95% ethanol followed by water (40 mL). The reaction was then extracted with EtOAc (3x40 mL). The combined organic layers were dried over Na<sub>2</sub>SO<sub>4</sub> and the solvent was removed by rotary evaporation. Crude product was purified by column chromatography using pentane/ethyl acetate (4:1) as an eluent yielding 0.976 g (93 %) of the target compound (**13**).

### **Synthesis of (E)-N-methyl-N-(naphthalen-1-ylmethyl)-3-phenylprop-2-en-1-amine (Naftifine) (14)**

Amide **13** was reduced following general procedure for catalytic reduction of amides.

## Compound characterization.

### 1-cinnamylpiperidine 2a

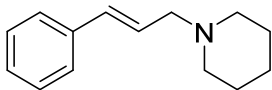 0.176 g, 87 % yield; <sup>1</sup>H-NMR (400 MHz, CDCl<sub>3</sub>): δ = 7.39 – 7.36 (m, 2H), 7.32 – 7.28 (m, 2H), 7.24 – 7.19 (m, 1H), 6.50 (d, *J* = 15.8 Hz, 1H), 6.30 (dt, *J*<sub>1</sub> = 6.7 Hz, *J*<sub>2</sub> = 15.8 Hz, 1H), 3.12 (dd, *J*<sub>1</sub> = 1.2 Hz, *J*<sub>2</sub> = 6.7 Hz, 2H), 2.44 (bs, 4H), 1.65 – 1.57 (m, 4H), 1.49 – 1.40 (m, 2H); <sup>13</sup>C-NMR (100 MHz, CDCl<sub>3</sub>): δ = 137.2, 132.8, 128.7, 127.5, 127.3, 126.4, 62.0, 54.7, 26.1, 24.5; HRMS (ESI, *m/z*) calcd. for C<sub>14</sub>H<sub>20</sub>N [M + H]<sup>+</sup> 202.1590, found 202.1585.

### 1-cinnamylpyrrolidine 2b

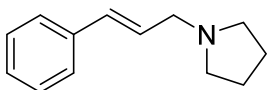 0.167 g, 89 % yield; <sup>1</sup>H-NMR (400 MHz, CDCl<sub>3</sub>): δ = 7.39 – 7.36 (m, 2H), 7.33 – 7.28 (m, 2H), 7.24 – 7.19 (m, 1H), 6.53 (d, *J* = 15.9 Hz, 1H), 6.34 (dt, *J*<sub>1</sub> = 6.7 Hz, *J*<sub>2</sub> = 15.9 Hz, 1H), 3.26 (dd, *J*<sub>1</sub> = 1.3 Hz, *J*<sub>2</sub> = 6.7 Hz, 2H), 2.59 – 2.53 (m, 4H), 1.83 – 1.77 (m, 4H); <sup>13</sup>C-NMR (100 MHz, CDCl<sub>3</sub>): δ = 137.3, 131.9, 128.7, 127.9, 127.5, 126.4, 58.6, 54.2, 23.6; HRMS (ESI, *m/z*) calcd. for C<sub>13</sub>H<sub>18</sub>N [M + H]<sup>+</sup> 188.1434, found 188.1433.

### 4-cinnamylmorpholine 2c

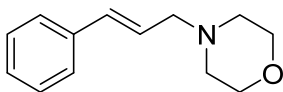 0.180 g, 89 % yield; <sup>1</sup>H-NMR (400 MHz, CDCl<sub>3</sub>): δ = 7.39 – 7.36 (m, 2H), 7.34 – 7.28 (m, 2H), 7.26 – 7.21 (m, 1H), 6.54 (d, *J* = 15.9 Hz, 1H), 6.26 (dt, *J*<sub>1</sub> = 6.7 Hz, *J*<sub>2</sub> = 15.9 Hz, 1H), 3.77 – 3.72 (m, 4H), 3.16 (dd, 2H, *J*<sub>1</sub> = 1.32 Hz, *J*<sub>2</sub> = 6.8 Hz), 2.53 – 2.48 (m, 4H); <sup>13</sup>C-NMR (100 MHz, CDCl<sub>3</sub>): δ = 136.9, 133.5, 128.7, 127.7, 126.5, 126.2, 67.1, 61.6, 53.8; HRMS (ESI, *m/z*) calcd. for C<sub>13</sub>H<sub>18</sub>NO [M + H]<sup>+</sup> 204.1383, found 204.1379.

### (*E*)-*N,N*-dimethyl-3-phenylprop-2-en-1-amine 2d

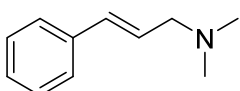 0.117 g, 73 % yield; <sup>1</sup>H-NMR (400 MHz, CDCl<sub>3</sub>): δ = 7.40 – 7.36 (m, 2H), 7.33 – 7.28 (m, 2H), 7.25 – 7.20 (m, 1H), 6.52 (d, *J* = 15.7 Hz, 1H), 6.27 (dt, *J*<sub>1</sub> = 6.6 Hz, *J*<sub>2</sub> = 15.7 Hz, 1H), 3.08 (dd, *J*<sub>1</sub> = 1.3 Hz, *J*<sub>2</sub> = 6.7 Hz, 2H), 2.28 (s, 6H); <sup>13</sup>C-NMR (100 MHz, CDCl<sub>3</sub>): δ = 137.2, 132.6, 128.7, 127.6, 127.5, 126.4, 62.2, 45.4; HRMS (ESI, *m/z*) calcd. for C<sub>11</sub>H<sub>16</sub>N [M + H]<sup>+</sup> 162.1277, found 162.1276.

**(E)-N,N-dibenzyl-3-phenylprop-2-en-1-amine 2e**

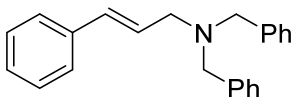 0.16 g, 51 % yield; <sup>1</sup>H-NMR (400 MHz, CDCl<sub>3</sub>): δ = 7.42 – 7.19 (m, 15H), 6.54 (d, *J* = 15.8 Hz, 1H), 6.31 (dt, *J*<sub>1</sub> = 6.5 Hz, *J*<sub>2</sub> = 15.8 Hz, 1H), 3.64 (s, 4H), 3.23 (dd, *J*<sub>1</sub> = 1.2 Hz, *J*<sub>2</sub> = 6.5 Hz, 2H); <sup>13</sup>C-NMR (100 MHz, CDCl<sub>3</sub>): δ = 139.8, 137.4, 132.6, 128.9, 128.7, 128.4, 127.9, 127.4, 127.0, 126.4, 58.1, 55.9; HRMS (ESI, m/z) calcd. for C<sub>23</sub>H<sub>24</sub>N [M + H]<sup>+</sup> 314.1903, found 314.1911.

**(E)-N,N-dimethyl-4-(3-(piperidin-1-yl)prop-1-en-1-yl)aniline 4a**

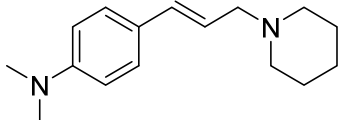 0.210 g, 82 % yield; <sup>1</sup>H-NMR (400 MHz, CDCl<sub>3</sub>): δ = 7.29 – 7.25 (m, 2H), 6.69 – 6.66 (m, 2H), 6.40 (d, *J* = 15.7 Hz, 1H), 6.09 (dt, *J*<sub>1</sub> = 7.0 Hz, *J*<sub>2</sub> = 15.7 Hz, 1H), 3.09 (dd, *J*<sub>1</sub> = 1.1 Hz, *J*<sub>2</sub> = 7.0 Hz, 2H), 2.94 (s, 6H), 2.42 (bs, 4H), 1.64 – 1.56 (m, 4H), 1.48 – 1.42 (m, 2H); <sup>13</sup>C-NMR (100 MHz, CDCl<sub>3</sub>): δ = 150.0, 132.7, 127.2, 125.8, 122.7, 112.5, 62.1, 54.5, 40.5, 26.0, 24.4; HRMS (ESI, m/z) calcd. for C<sub>16</sub>H<sub>24</sub>N<sub>2</sub>Na<sub>2</sub> [M + 2Na]<sup>2+</sup> 145.0862, found 145.0863.

**(E)-1-(3-(4-bromophenyl)allyl)piperidine 4b**

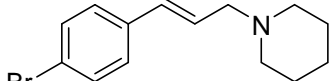 0.256 g, 91 % yield; <sup>1</sup>H-NMR (400 MHz, CDCl<sub>3</sub>): δ = 7.41 – 7.37 (m, 2H), 7.22 – 7.19 (m, 2H), 6.40 (d, *J* = 15.9 Hz, 1H), 6.27 (dt, *J*<sub>1</sub> = 6.6 Hz, *J*<sub>2</sub> = 15.8 Hz, 1H), 3.07 (dd, *J*<sub>1</sub> = 1.0 Hz, *J*<sub>2</sub> = 6.6 Hz, 2H), 2.40 (bs, 4H), 1.63 – 1.55 (m, 4H), 1.45 – 1.41 (m, 2H); <sup>13</sup>C-NMR (100 MHz, CDCl<sub>3</sub>): δ = 136.1, 131.7, 131.4, 128.3, 127.9, 121.1, 61.8, 54.7, 26.0, 24.4; HRMS (ESI, m/z) calcd. for C<sub>14</sub>H<sub>19</sub>BrN [M + H]<sup>+</sup>: 280.0695; found: 280.0685.

**(E)-4-(3-(piperidin-1-yl)prop-1-en-1-yl)phenol 4c**

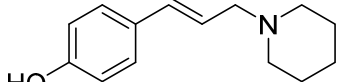 0.196 g, 90 % yield; <sup>1</sup>H-NMR (400 MHz, CDCl<sub>3</sub>): δ = 8.87 (bs, 1H), 7.11 – 7.04 (m, 2H), 6.75 – 6.64 (m, 2H), 6.39 (d, *J* = 16.0 Hz, 1H), 5.98 (dt, *J*<sub>1</sub> = 7.1 Hz, *J*<sub>2</sub> = 15.9 Hz, 1H), 3.12 (d, *J*<sub>2</sub> = 7.0 Hz, 2H), 2.57 (bs, 4H), 1.73 – 1.62 (m, 4H), 1.53 – 1.42 (m, 2H); <sup>13</sup>C-NMR (100 MHz, CDCl<sub>3</sub>): δ = 157.0, 134.3, 128.3, 127.9, 122.0, 116.4, 61.7, 54.4, 25.2, 24.1; HRMS (ESI, m/z) calcd. for C<sub>14</sub>H<sub>20</sub>NO [M + H]<sup>+</sup>: 218.1539; found: 218.1544.

**(E)-1-(3-(furan-2-yl)allyl)piperidine 4d**

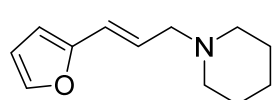

0.170 g, 89 % yield;  $^1\text{H-NMR}$  (400 MHz,  $\text{CDCl}_3$ ):  $\delta$  = 7.34 – 7.30 (m, 1H), 6.37 – 6.28 (m, 2H), 6.26-6.16 (m, 2H), 3.09 – 3.06 (m, 2H), 2.41 (bs, 4H), 1.65 – 1.53 (m, 4H), 1.49 – 1.39 (m, 2H);  $^{13}\text{C-NMR}$  (100 MHz,  $\text{CDCl}_3$ ):  $\delta$  = 152.9, 141.9, 126.2, 121.2, 111.3, 107.2, 61.7, 54.7, 26.1, 24.5; **HRMS** (ESI, m/z) calcd. for  $\text{C}_{12}\text{H}_{18}\text{NO}$   $[\text{M} + \text{H}]^+$  192.1383, found 192.1375.

**(E)-1-(3-(thiophen-2-yl)allyl)piperidine 4e**

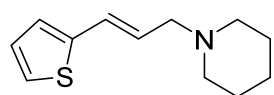

0.190 g, 92 % yield;  $^1\text{H-NMR}$  (400 MHz,  $\text{CDCl}_3$ ):  $\delta$  = 7.14 – 7.10 (m, 1H), 6.97 – 6.88 (m, 2H), 6.62 (d, 1H,  $J$  = 15.7 Hz), 6.13 (dt, 1H,  $J_1$  = 6.9 Hz,  $J_2$  = 15.7 Hz) 3.07 (dd, 2H,  $J_1$  = 1.3 Hz,  $J_2$  = 6.9 Hz), 2.42 (bs, 4H), 1.67-1.53 (m, 4H), 1.51 – 1.38 (m, 2H);  $^{13}\text{C-NMR}$  (100 MHz,  $\text{CDCl}_3$ ):  $\delta$  = 142.5, 127.4, 127.3, 125.8, 125.2, 124.0, 61.7, 54.7, 26.1, 24.5; **HRMS** (ESI, m/z) calcd. for  $\text{C}_{12}\text{H}_{18}\text{NS}$   $[\text{M} + \text{H}]^+$  208.1154, found 208.1158.

**1-(2-methyl-3-phenylallyl)piperidine 6**

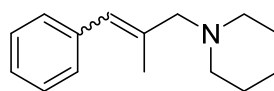

0.191 g, 88 % yield;  $^1\text{H-NMR}$  (400 MHz,  $\text{CDCl}_3$ ):  $\delta$  = 7.40 – 7.19 (m, 5H, minor and major), 6.52 (s, 1H, minor), 6.48 (s, 1H, major), 3.12 – 3.10 (m, 2H, minor), 3.04 – 3.01 (m, 2H, major), 2.42 (bs, 4H, major), 2.32 (bs, 4H, minor), 2.02 – 2.00 (m, 3H, minor), 1.98 – 1.96 (m, 3H, major), 1.69 – 1.56 (m, 4H, major and minor), 1.55 – 1.40 (m, 2H, major and minor);  $^{13}\text{C-NMR}$  (100 MHz,  $\text{CDCl}_3$ ):  $\delta$  = 138.2, 136.5, 128.9, 128.1, 127.1, 126.2, 68.8, 54.7, 26.1, 24.6, 16.9 (major); 138.2, 137.3, 129.2, 128.6, 127.9, 126.1, 59.8, 54.5, 26.1, 24.5, 23.2 (minor); **HRMS** (ESI, m/z) calcd. for  $\text{C}_{15}\text{H}_{22}\text{N}$   $[\text{M} + \text{H}]^+$ : 216.1747; found: 216.1737.

**(E)-N-benzyl-3-phenylprop-2-en-1-amine 9**

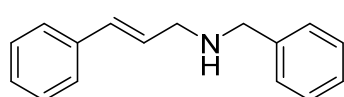

0.159 g, 71 % yield;  $^1\text{H-NMR}$  (400 MHz,  $\text{CDCl}_3$ ):  $\delta$  = 7.46 – 7.24 (m, 10H), 6.59 (d,  $J$  = 15.9 Hz, 1H), 6.38 (dt,  $J$  = 6.3 Hz, 15.9 Hz, 1H), 3.90 (s, 2H), 3.49 (d,  $J$  = 5.5 Hz, 2H), 2.66 (s, 1H);  $^{13}\text{C-NMR}$  (100 MHz,  $\text{CDCl}_3$ ):  $\delta$  = 139.6, 137.0, 131.8, 128.5, 128.3, 127.8, 127.4, 127.1, 126.3, 53.0, 50.1; **HRMS** (ESI, m/z) calcd. for  $\text{C}_{16}\text{H}_{18}\text{N}$   $[\text{M} + \text{H}]^+$ : 224.1434; found: 224.1444.

### N-(naphthalen-1-ylmethyl)cinnamamide 12

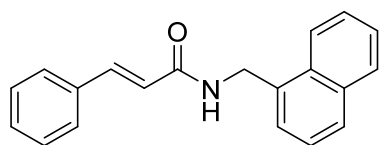

1.306 g, 91 % yield;  $^1\text{H-NMR}$  (400 MHz,  $\text{CDCl}_3$ ):  $\delta$  = 8.08 – 8.04 (m, 1H), 7.90 – 7.80 (m, 2H), 7.69 (d,  $J$  = 15.6 Hz, 1H), 7.59 – 7.42 (m, 6H), 7.36 – 7.31 (m, 3H), 6.36 (d,  $J$  = 15.6 Hz, 1H), 5.91 (bs, 1H), 5.03 – 5.00 (m, 2H);  $^{13}\text{C-NMR}$  (100 MHz,  $\text{CDCl}_3$ ):  $\delta$  = 165.6, 141.6, 134.9, 134.1, 133.6, 131.6, 129.9, 128.9, 128.9, 127.9, 127.1, 126.9, 126.2, 125.6, 123.7, 120.4, 42.2; **HRMS** (ESI,  $m/z$ ) calcd. for  $\text{C}_{21}\text{H}_{19}\text{NNaO}$  [ $\text{M} + \text{Na}^+$ ]: 324.1359; found: 324.1345.

### N-methyl-N-(naphthalen-1-ylmethyl)cinnamamide 13

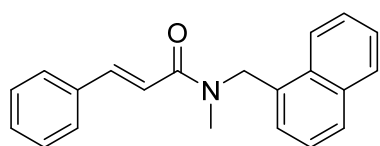

0.976 g, 93 % yield;  $^1\text{H-NMR}$  (500 MHz,  $(\text{CD}_3)_2\text{SO}$ ):  $\delta$  = 7.66 – 7.62 (m, 1H), 7.45 – 7.42 (m, 1H), 7.14 – 6.94 (m, 6H), 6.89 – 6.81 (m, 4H), 6.68 – 6.62 (m, 1H), 4.68 (s, 2H), 2.55 (s, 3H);  $^{13}\text{C-NMR}$  (125 MHz,  $(\text{CD}_3)_2\text{SO}$ ):  $\delta$  = 165.6, 140.9, 134.8, 133.1, 132.6, 130.7, 128.8, 128.1, 128.0, 127.3, 127.2, 125.7, 125.2, 124.8, 122.8, 118.5, 48.5, 33.8; **HRMS** (ESI,  $m/z$ ) calcd. for  $\text{C}_{20}\text{H}_{17}\text{NNaO}$  [ $\text{M} + \text{Na}^+$ ]: 310.1202; found: 310.1208.

### (E)-N-methyl-N-(naphthalen-1-ylmethyl)-3-phenylprop-2-en-1-amine 14

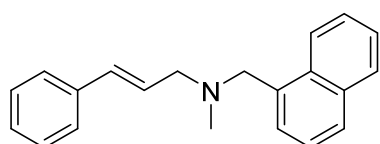

0.263 g, 92 % yield;  $^1\text{H-NMR}$  (400 MHz,  $\text{CDCl}_3$ ):  $\delta$  = 8.40 – 8.36 (m, 1H), 7.93 – 7.88 (m, 1H), 7.87 – 7.81 (m, 1H), 7.63 – 7.51 (m, 3H), 7.50 – 7.44 (m, 3H), 7.41 – 7.35 (m, 2H), 7.32 – 7.26 (m, 1H), 6.65 (d,  $J$  = 16.0 Hz, 1H), 6.45 (dt,  $J$  = 6.6 Hz, 16.0 Hz, 1H), 4.02 (s, 2H), 3.35 (dd,  $J$  = 1.2 Hz, 6.6 Hz, 2H), 2.35 (s, 3H);  $^{13}\text{C-NMR}$  (100 MHz,  $\text{CDCl}_3$ ):  $\delta$  = 137.3, 135.0, 134.0, 132.8, 132.6, 128.7, 128.6, 128.0, 127.7, 127.6, 127.5, 126.4, 126.0, 125.7, 125.2, 124.8, 60.5, 60.2, 42.6; **HRMS** (ESI,  $m/z$ ) calcd. for  $\text{C}_{21}\text{H}_{22}\text{N}$  [ $\text{M} + \text{H}^+$ ]: 288.1747; found: 288.1747.



## **Spectroscopic data.**

CDC13  
400 MHz

7.382  
7.364  
7.319  
7.301  
7.281  
7.233  
7.215  
7.197  
6.518  
6.478  
6.343  
6.326  
6.309  
6.303  
6.286  
6.269

3.133  
3.130  
3.116  
3.113

— 2.437

1.637  
1.623  
1.609  
1.595  
1.581  
1.477  
1.448

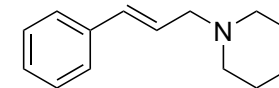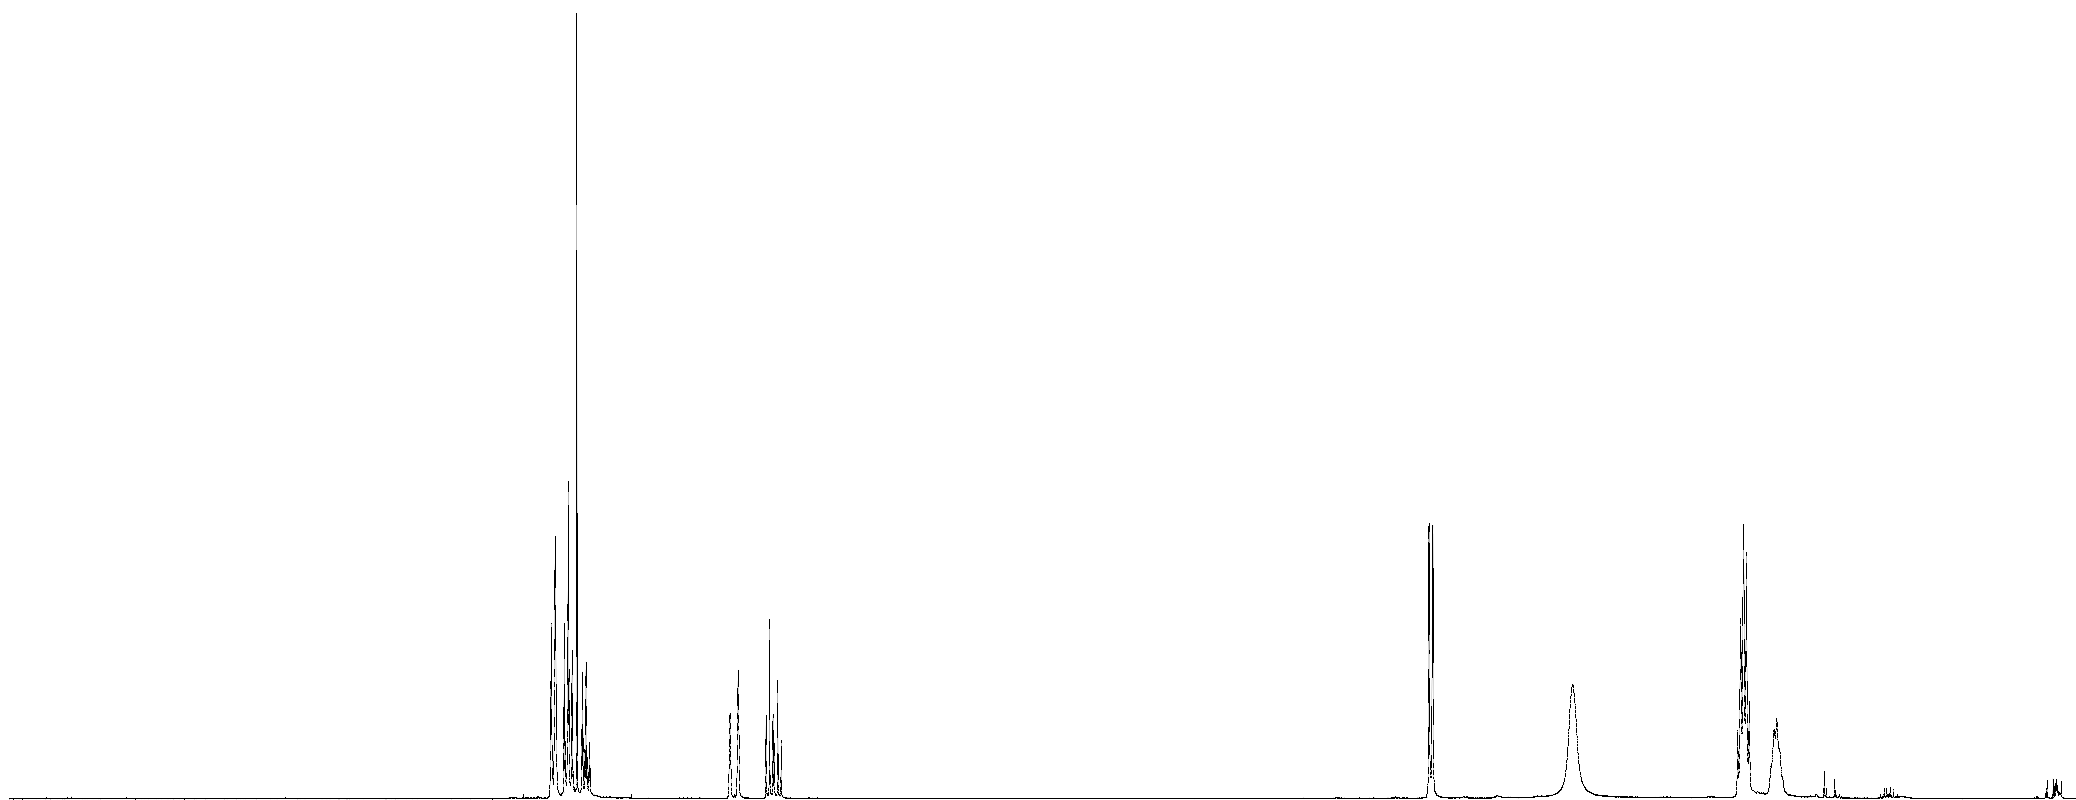

9.5 9.0 8.5 8.0 7.5 7.0 6.5 6.0 5.5 5.0 4.5 4.0 3.5 3.0 2.5 2.0 1.5 1.0 ppm

1.96  
2.00  
1.09  
1.00  
1.02  
2.02  
3.99  
4.05  
2.10

CDC13  
100 MHz

137.22  
132.78  
128.66  
127.48  
127.34  
126.41

62.00  
54.73

26.10  
24.47

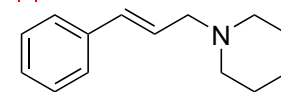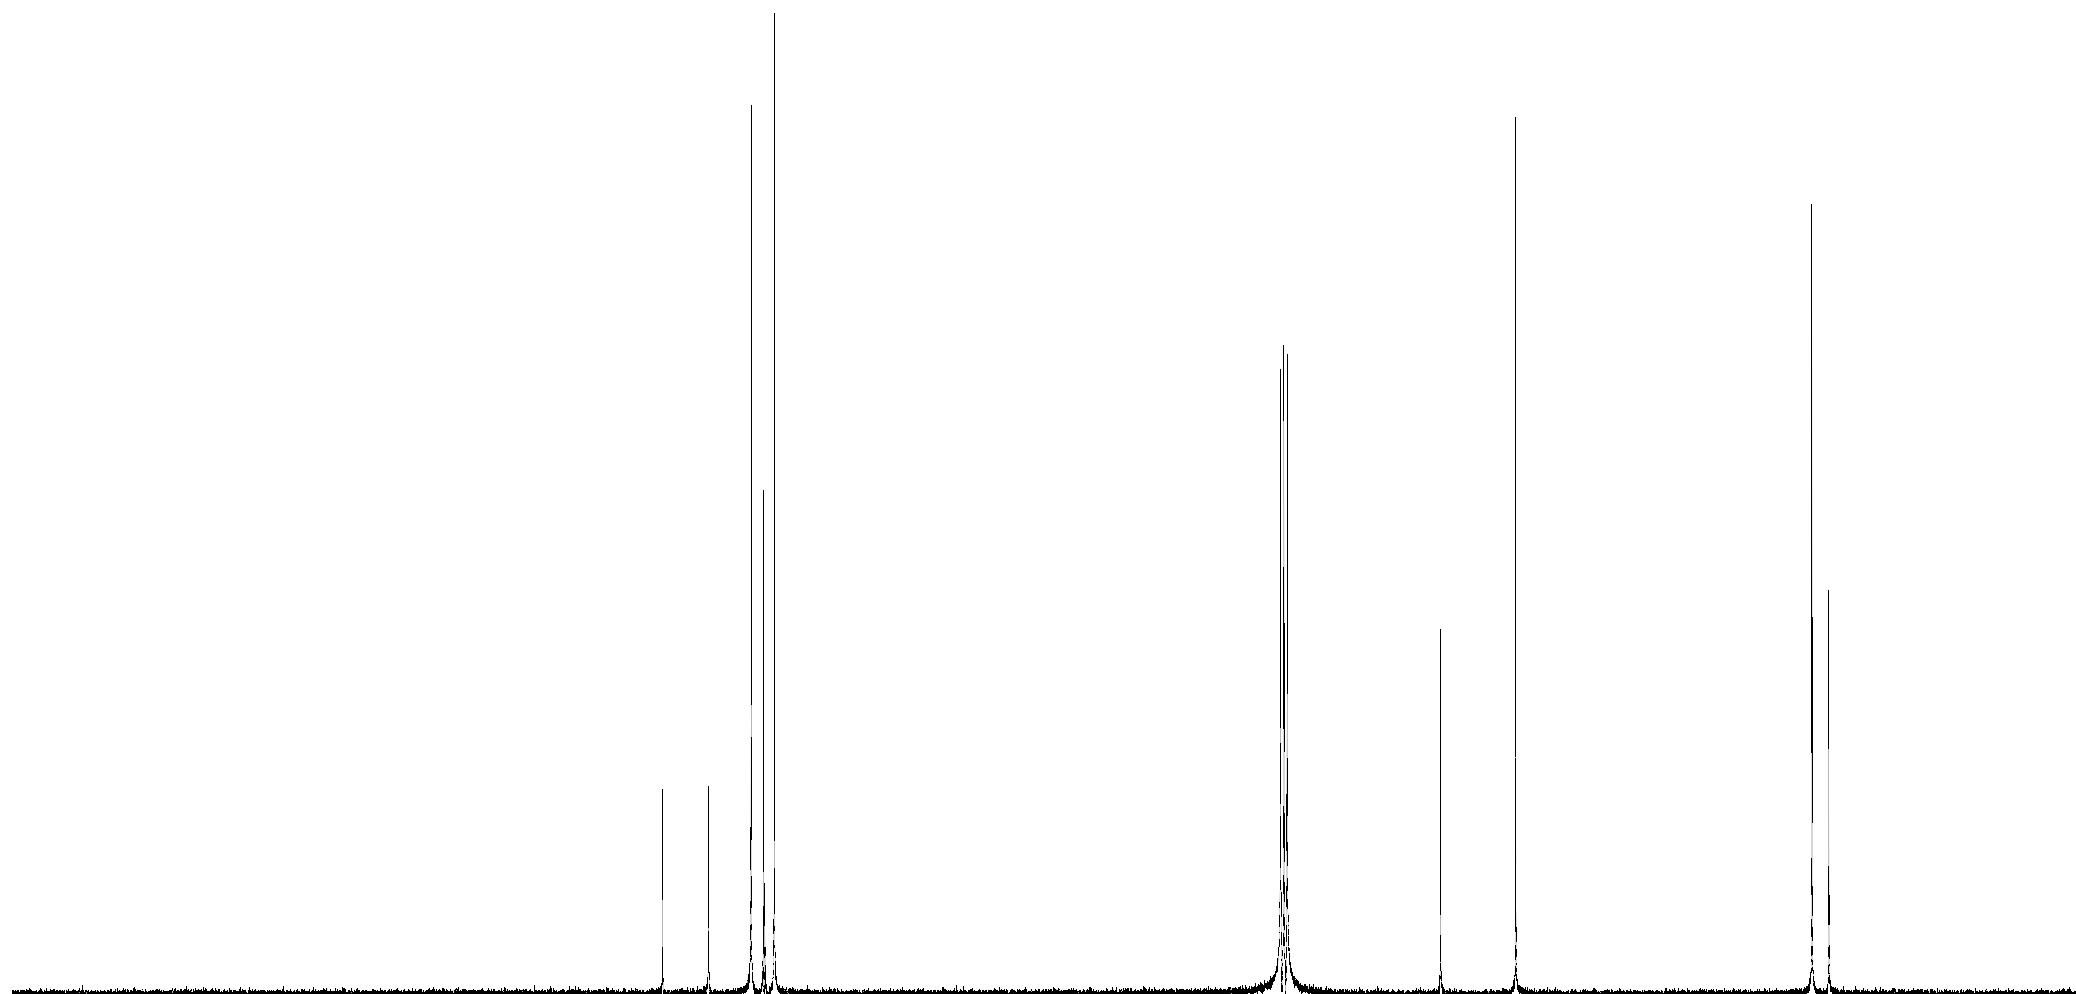

190 180 170 160 150 140 130 120 110 100 90 80 70 60 50 40 30 20 10 ppm

CDC13  
400 MHz

7.383  
7.366  
7.321  
7.302  
7.283  
7.234  
7.215  
7.197  
6.554  
6.514  
6.374  
6.358  
6.341  
6.335  
6.318  
6.301

3.271  
3.268  
3.254  
3.251  
2.575  
2.558  
2.541  
1.822  
1.815  
1.805  
1.796  
1.789

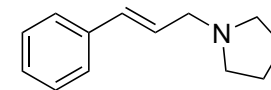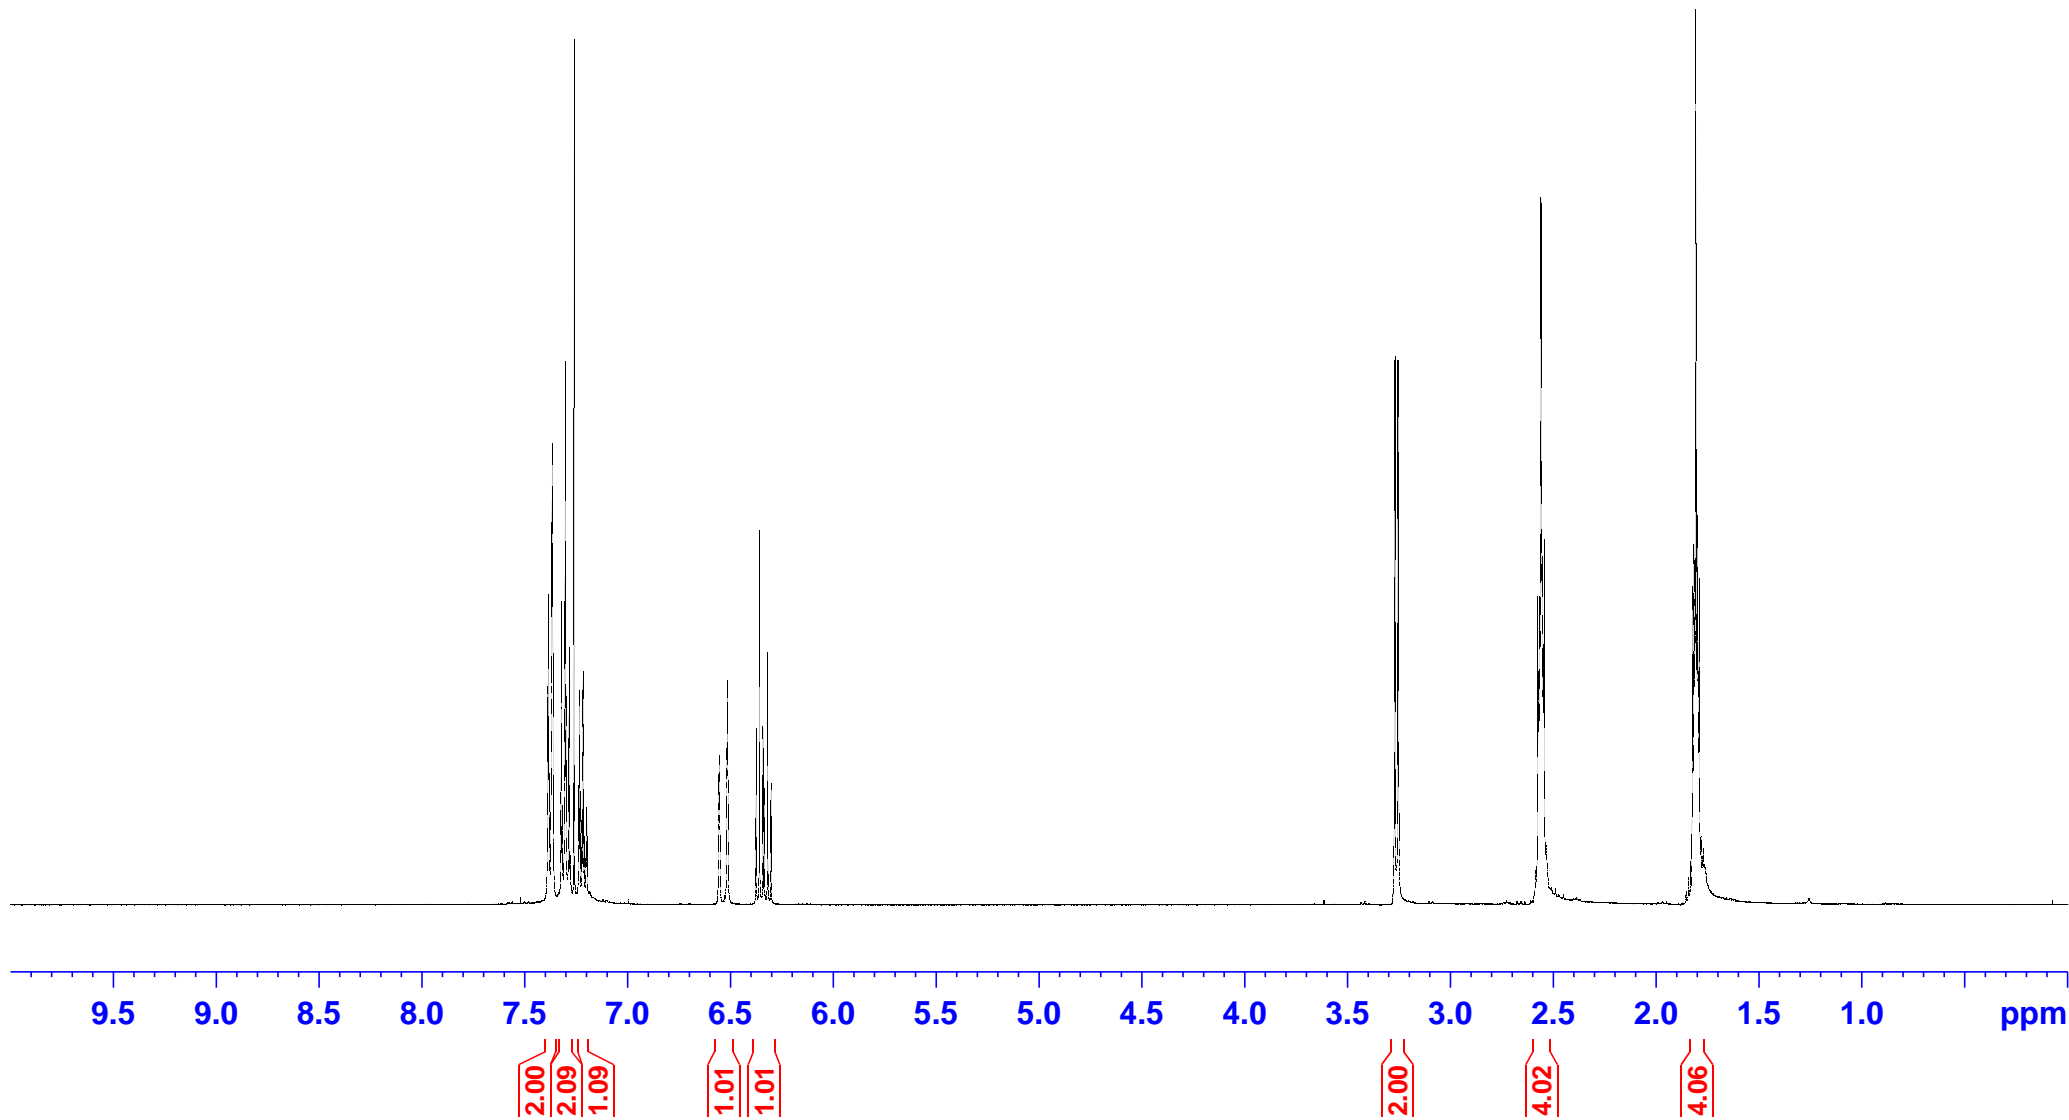

CDC13  
400 MHz

7.385  
7.367  
7.329  
7.311  
7.291  
7.249  
7.231  
7.213  
6.556  
6.517  
6.295  
6.278  
6.261  
6.255  
6.238  
6.221

3.752  
3.740  
3.728  
3.167  
3.163  
3.150  
3.146  
2.517  
2.506  
2.495

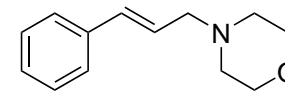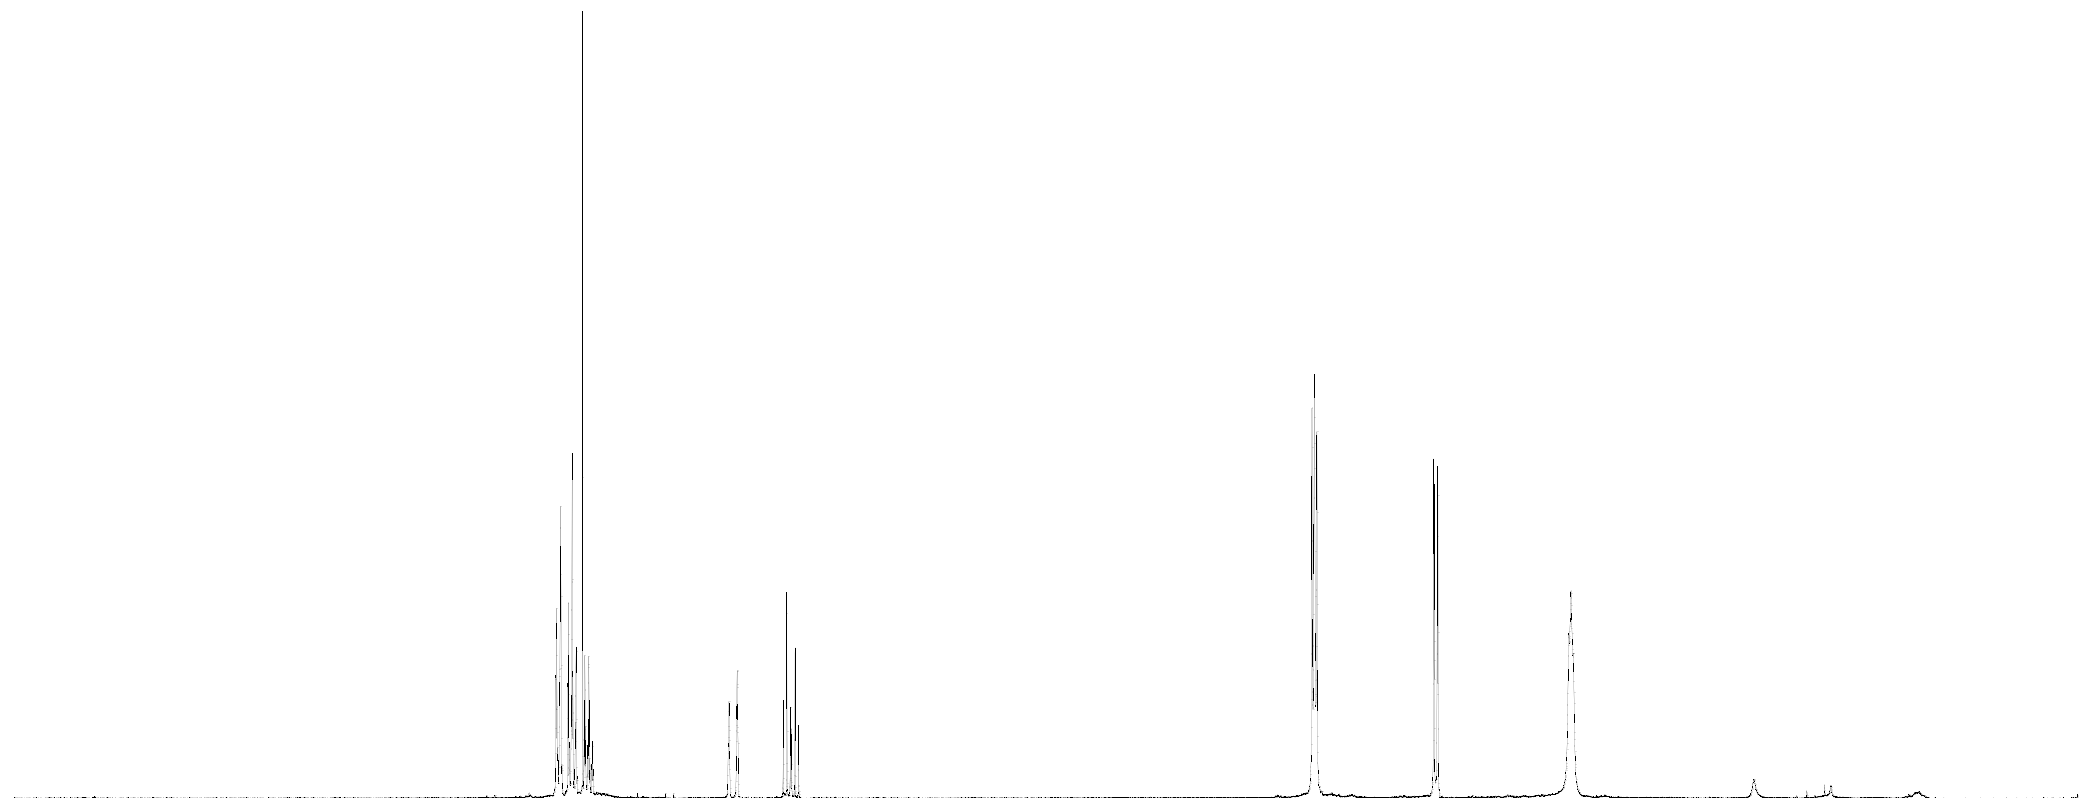

9.5 9.0 8.5 8.0 7.5 7.0 6.5 6.0 5.5 5.0 4.5 4.0 3.5 3.0 2.5 2.0 1.5 1.0 ppm

2.07  
2.06  
1.09

1.00  
1.00

4.09

2.02

4.01

CDCl<sub>3</sub>  
100 MHz

137.32  
131.90  
128.65  
127.98  
127.45  
126.42

58.56  
54.23

23.62

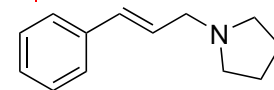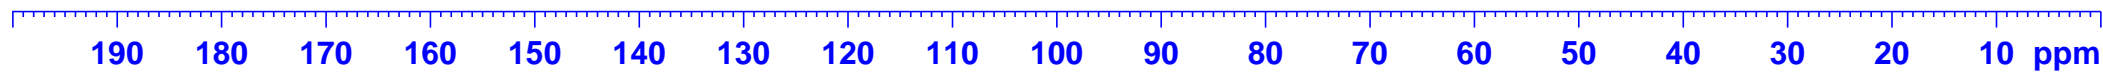

CDCl<sub>3</sub>  
100 MHz

136.94  
133.50  
128.70  
127.70  
126.45  
126.20

67.13

61.60

53.83

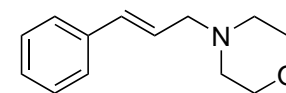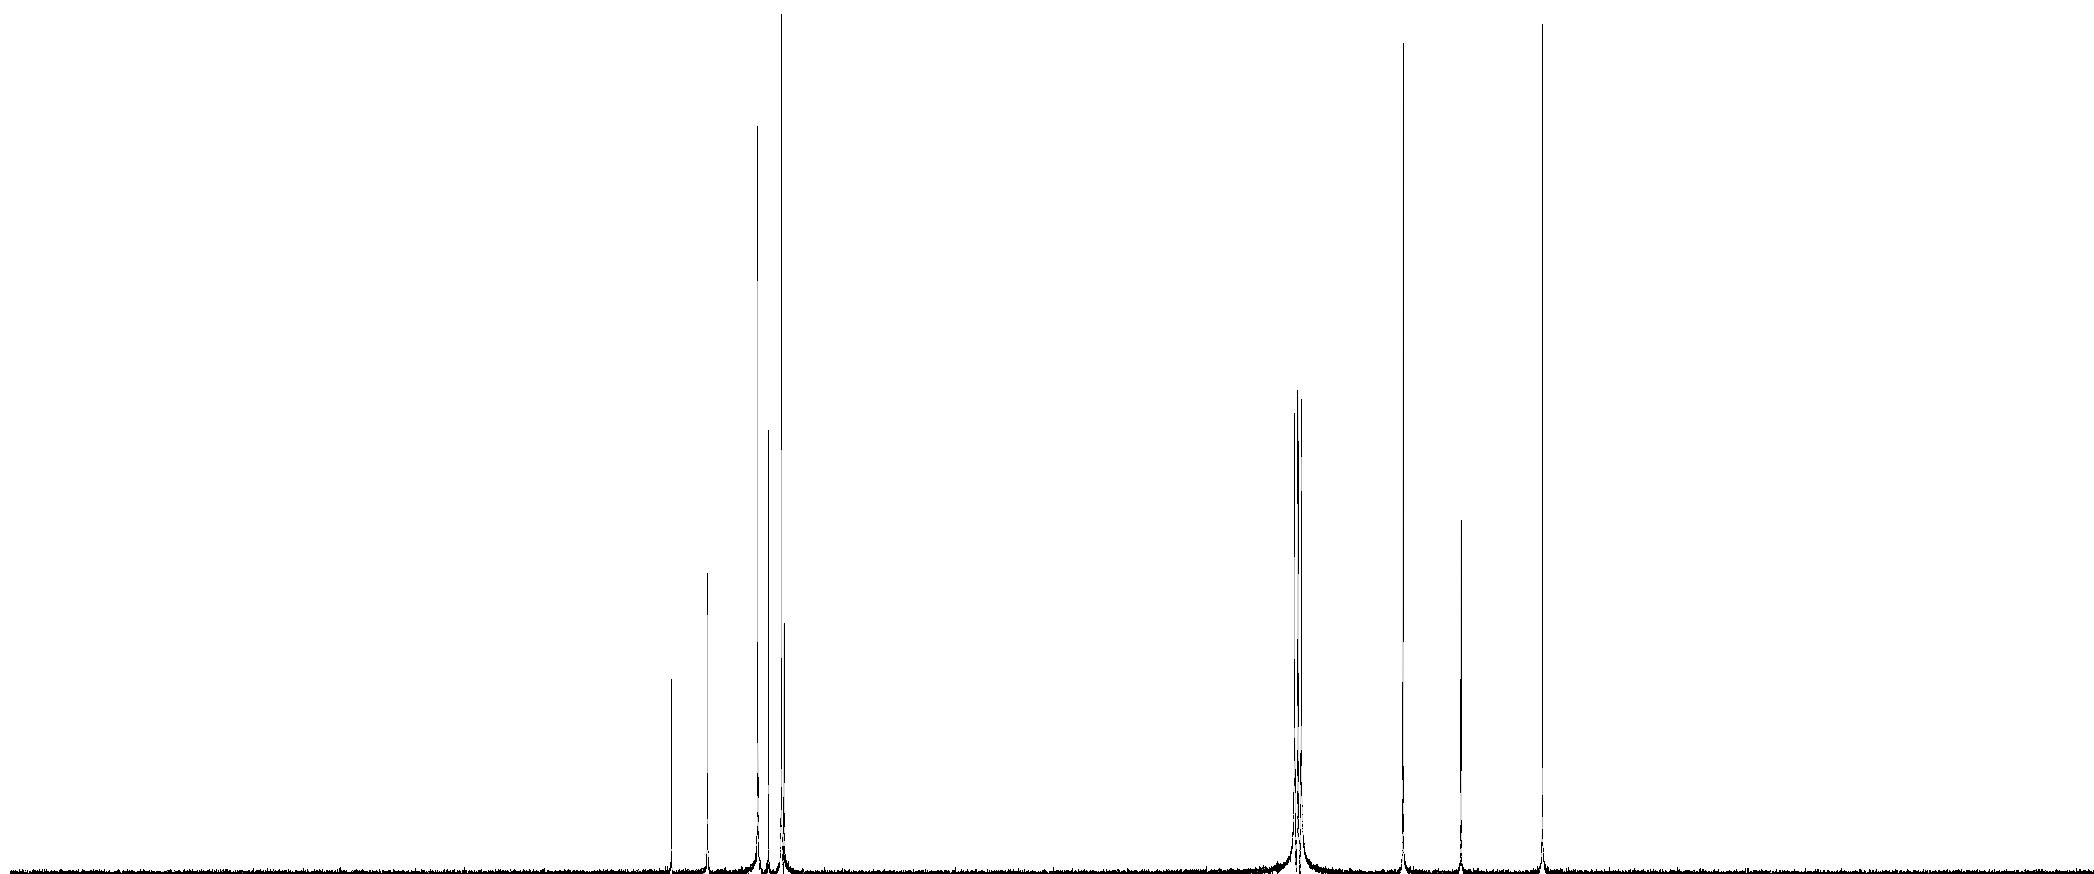

190 180 170 160 150 140 130 120 110 100 90 80 70 60 50 40 30 20 10 ppm

CDC13  
400 MHz

7.390  
7.373  
7.328  
7.310  
7.290  
7.243  
7.225  
7.207  
6.536  
6.496  
6.303  
6.287  
6.270  
6.264  
6.247  
6.230

3.088  
3.084  
3.071  
3.068

2.279

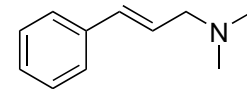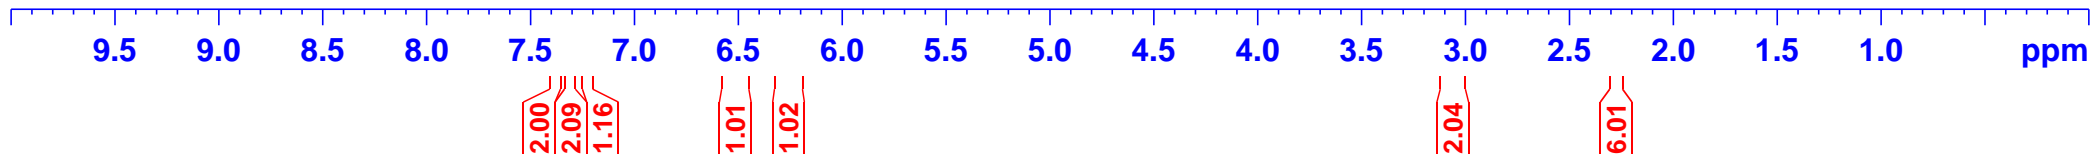



CDCl<sub>3</sub>  
100 MHz

137.20  
132.64  
128.68  
127.61  
127.54  
126.43

62.23

45.44

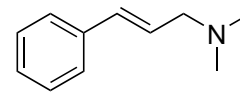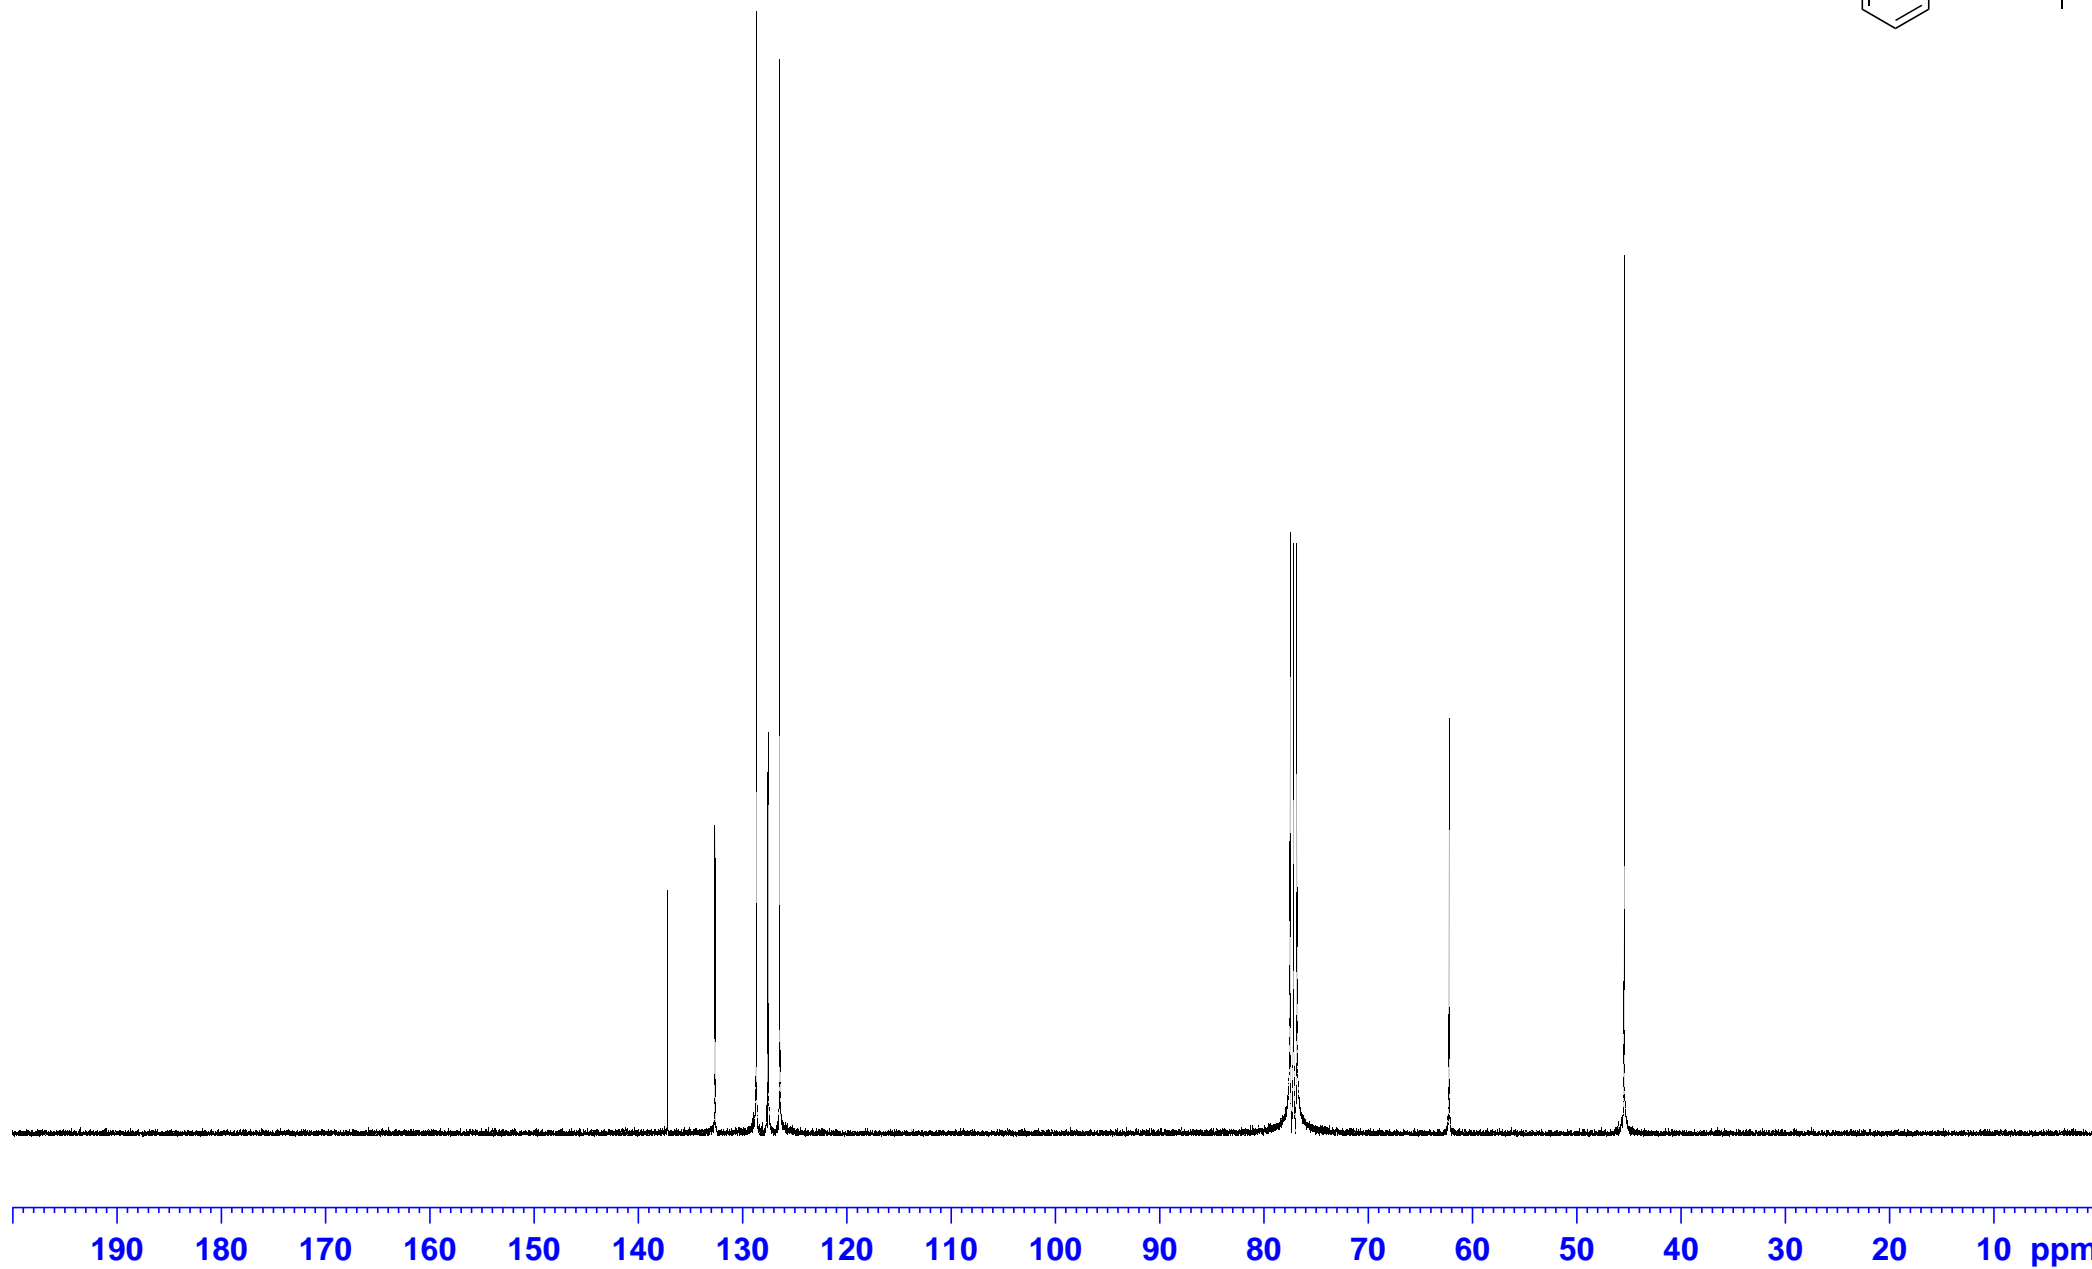

CDC13  
400 MHz

7.413  
7.396  
7.377  
7.343  
7.325  
7.306  
7.287  
7.240  
7.219  
7.201  
6.561  
6.522  
6.344  
6.328  
6.312  
6.304  
6.288  
6.272

3.639  
3.244  
3.241  
3.228  
3.225

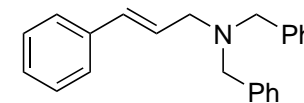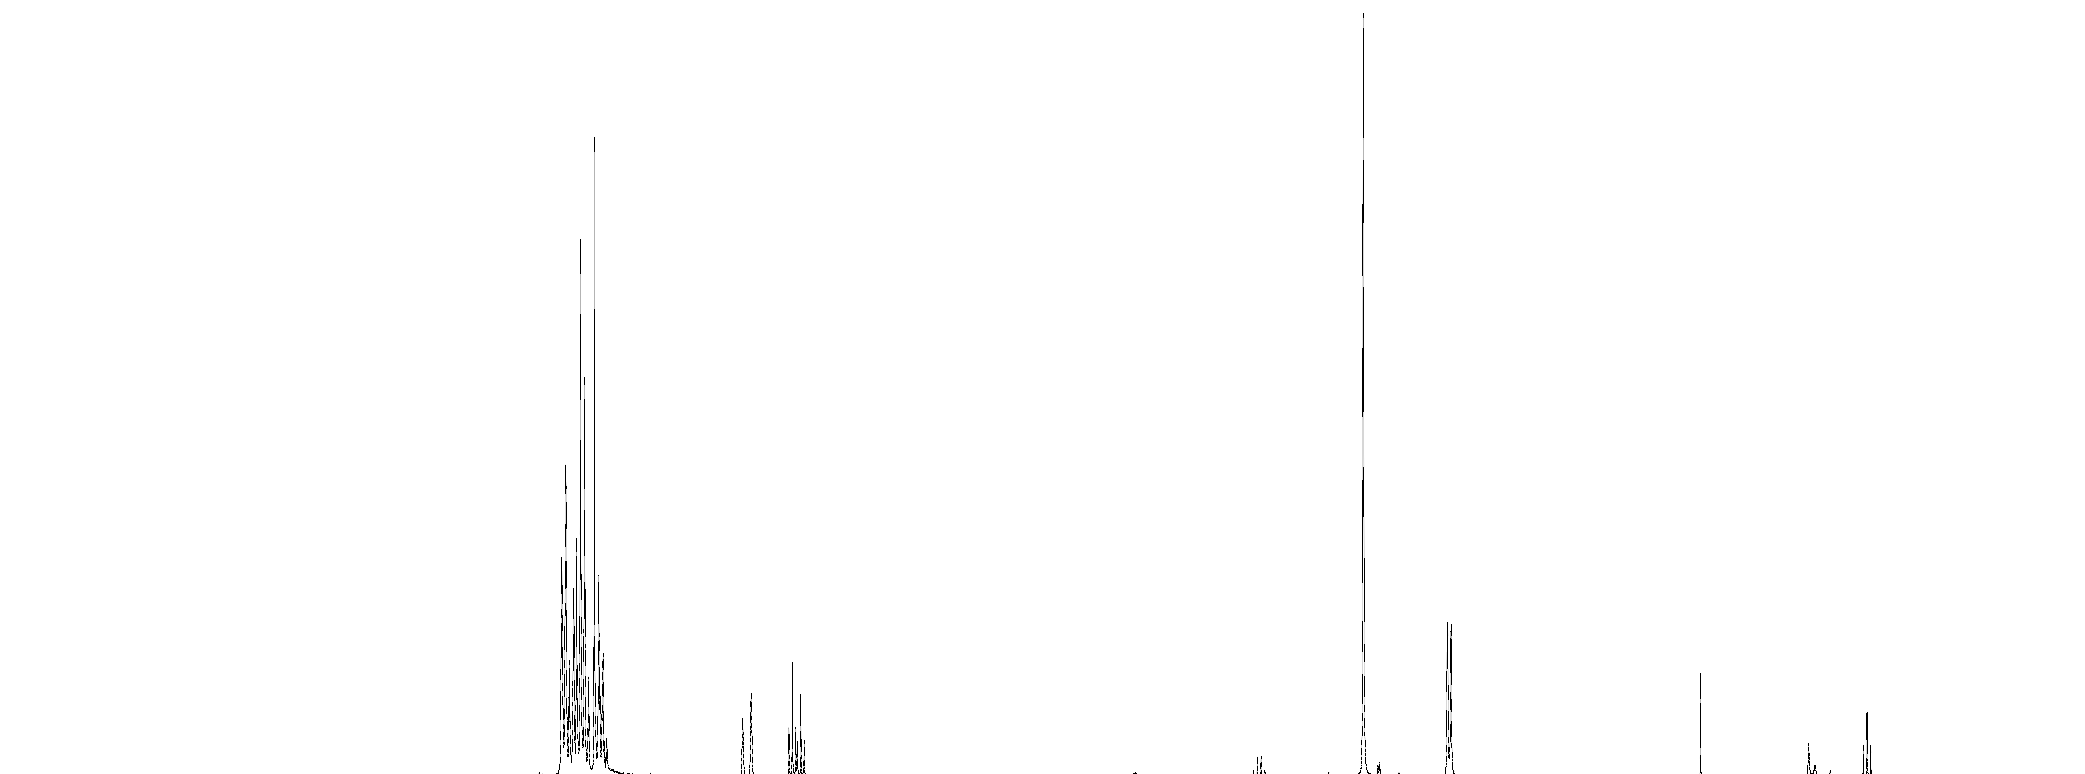

9.5 9.0 8.5 8.0 7.5 7.0 6.5 6.0 5.5 5.0 4.5 4.0 3.5 3.0 2.5 2.0 1.5 1.0 ppm

15.88

1.00

1.00

4.04

2.01

CDCl<sub>3</sub>  
100 MHz

139.77  
137.35  
132.61  
128.93  
128.65  
128.36  
127.91  
127.44  
126.99  
126.39

58.09  
55.91

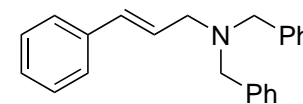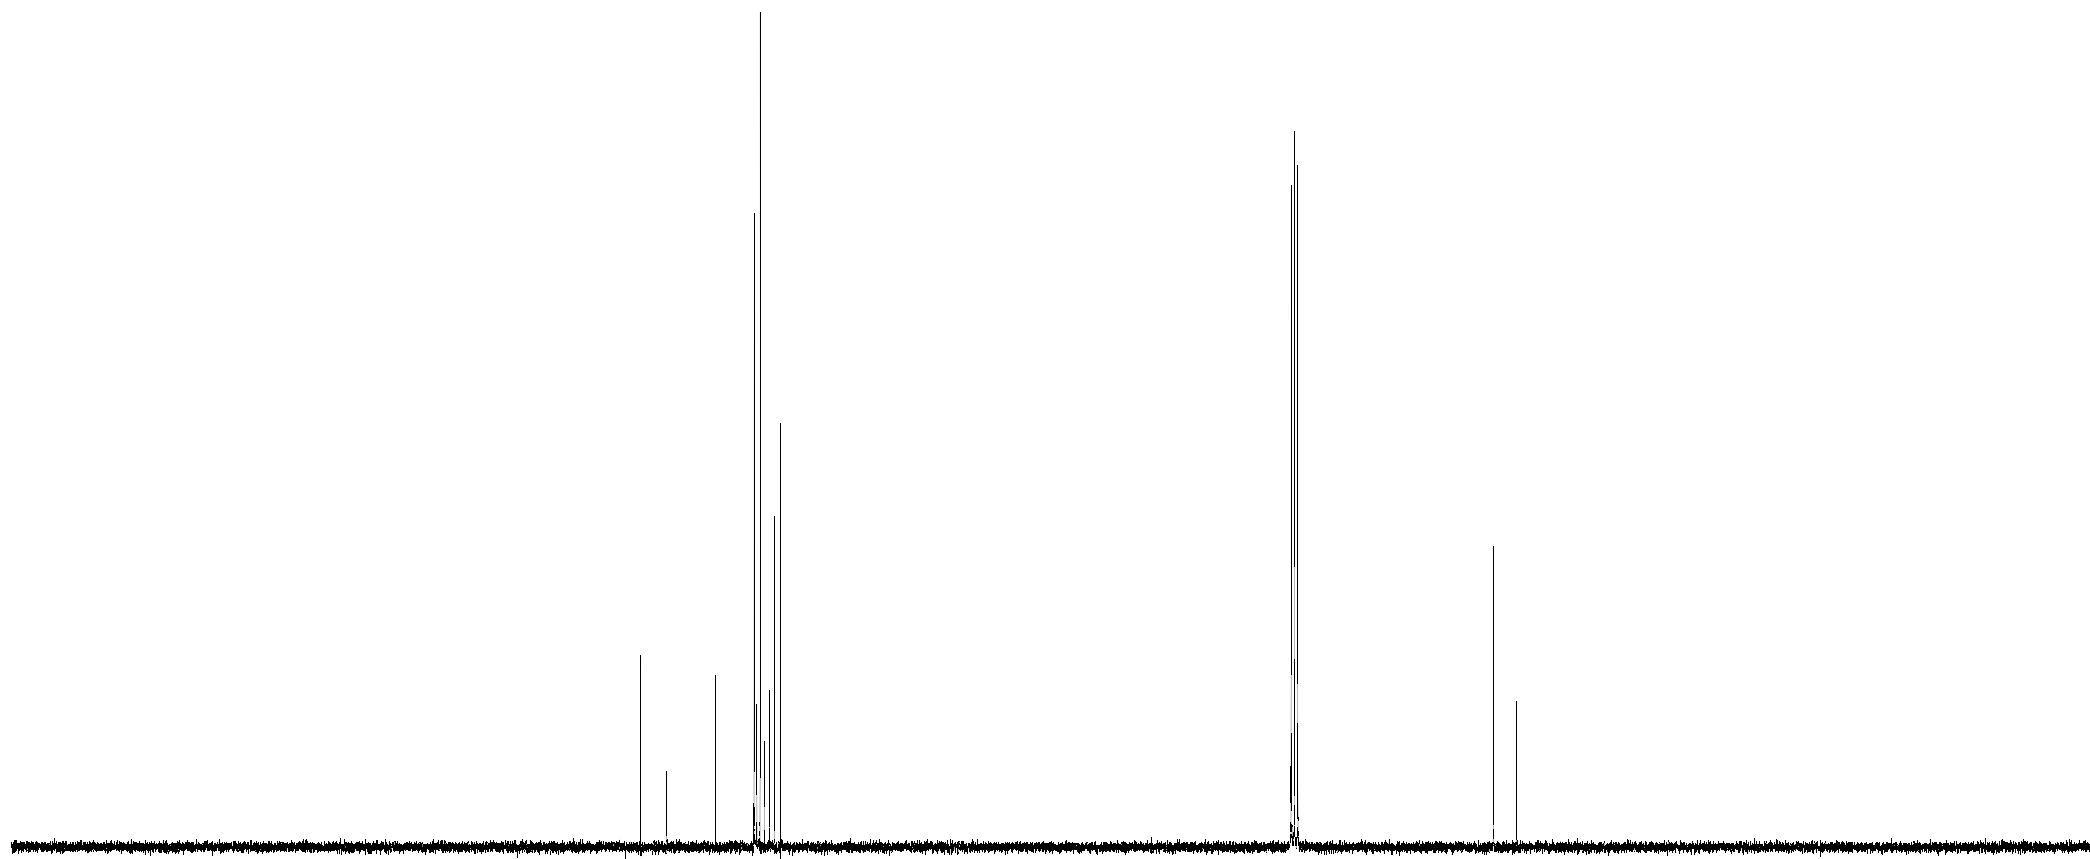

190 180 170 160 150 140 130 120 110 100 90 80 70 60 50 40 30 20 10 ppm

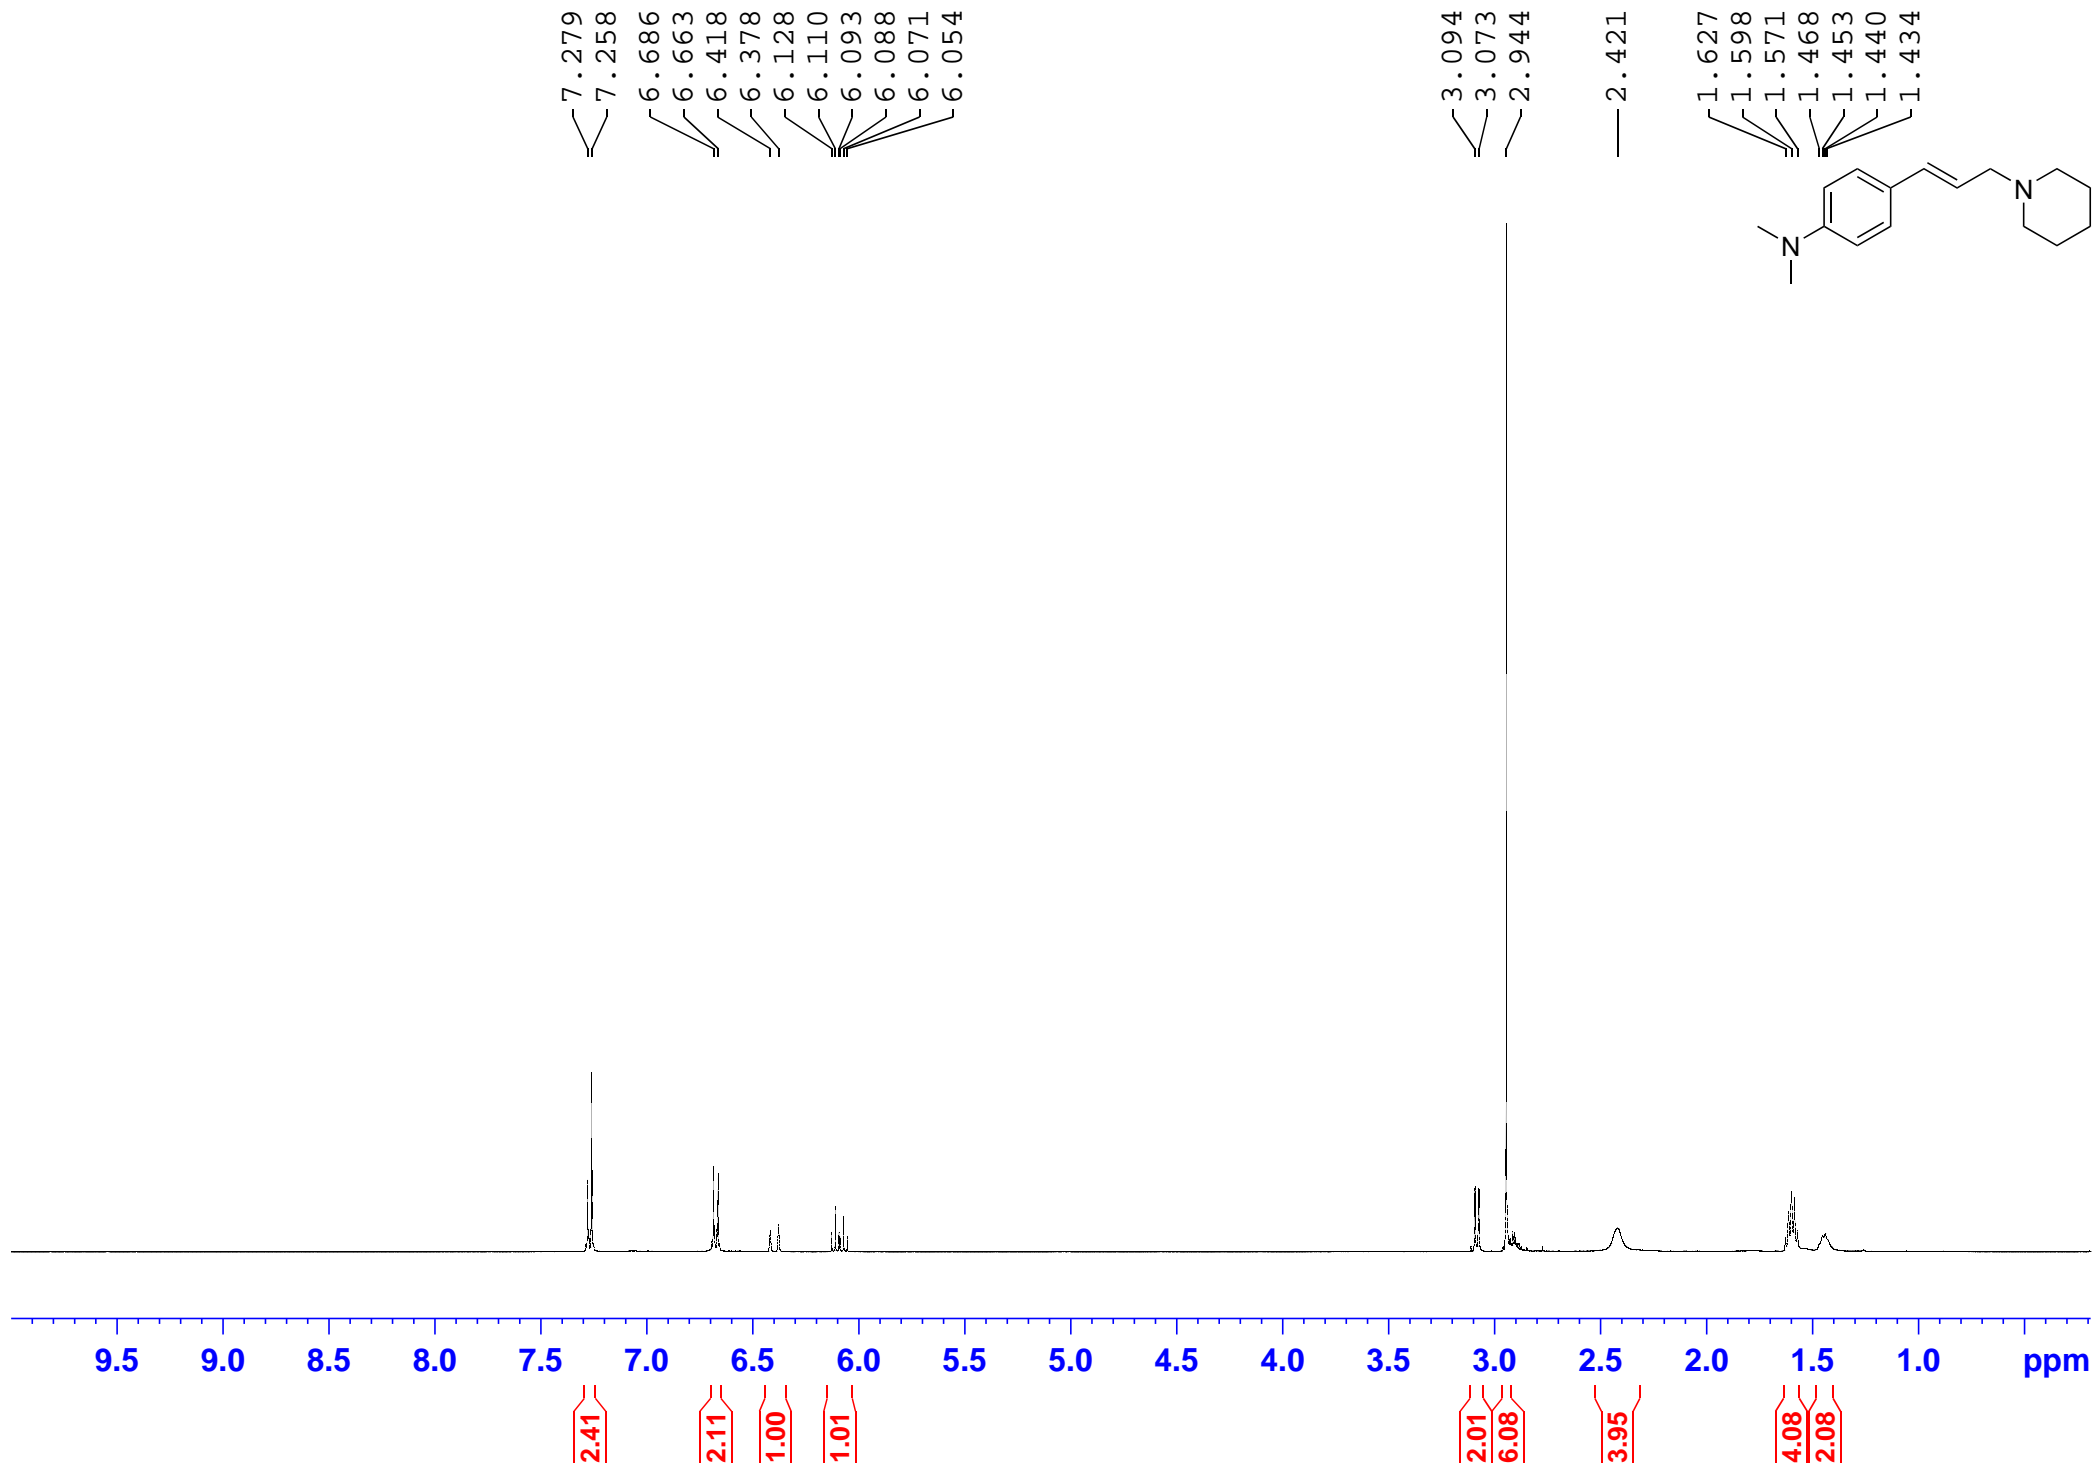

CDC13  
100 MHz

150.02

132.71

127.22

125.75

122.65

112.52

62.14

54.52

40.54

26.00

24.44

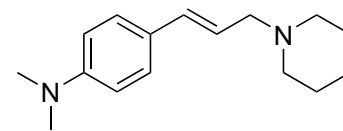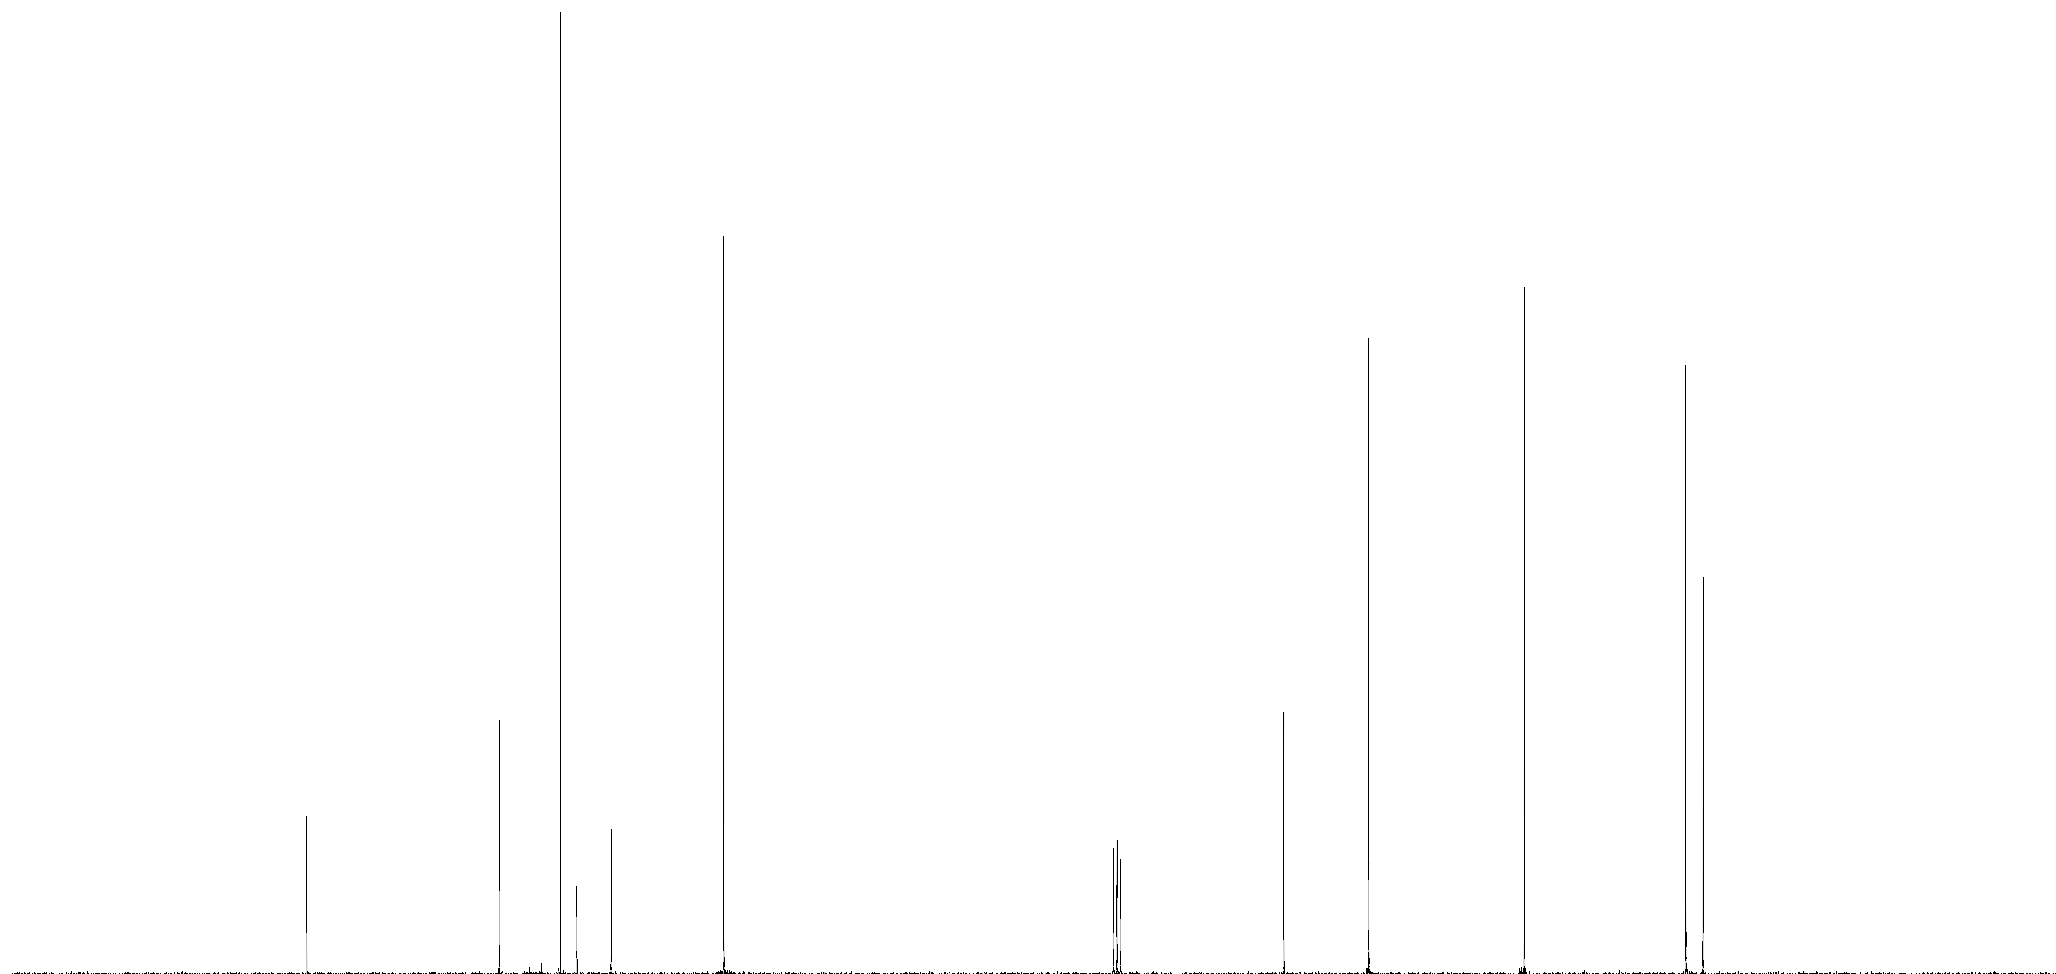

170 160 150 140 130 120 110 100 90 80 70 60 50 40 30 20 10 ppm

CDCl<sub>3</sub>  
400 MHz

7.401  
7.380  
7.213  
7.191  
6.429  
6.389  
6.305  
6.289  
6.272  
6.266  
6.249  
6.232

3.083  
3.064

2.400

1.613  
1.599  
1.585  
1.571  
1.557  
1.437  
1.425

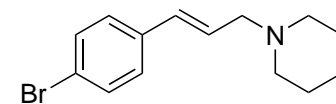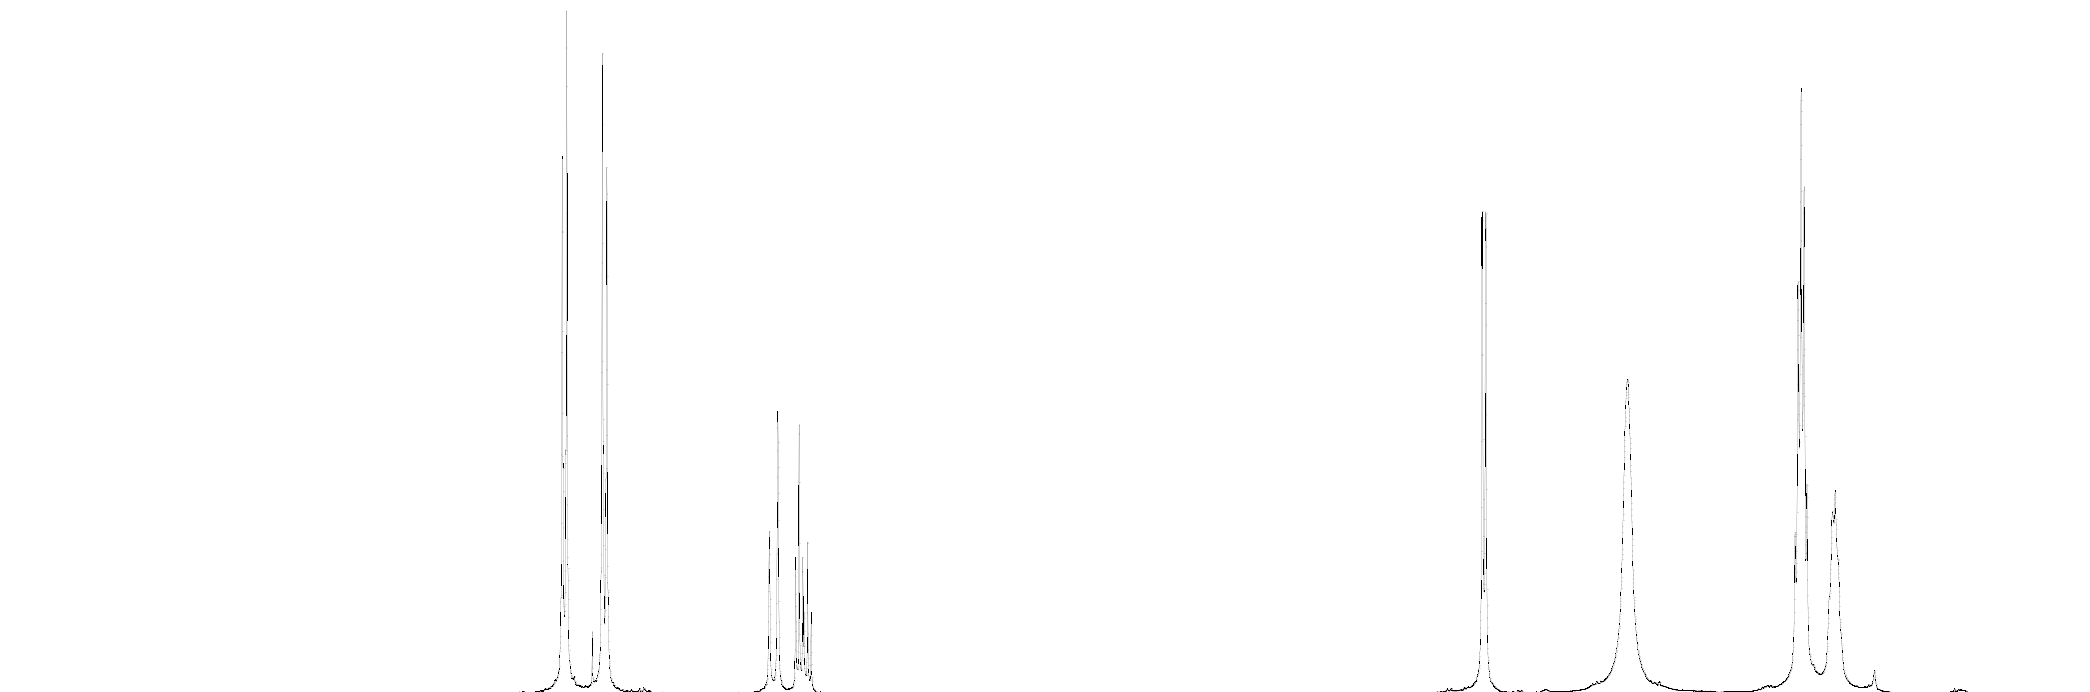

9.5 9.0 8.5 8.0 7.5 7.0 6.5 6.0 5.5 5.0 4.5 4.0 3.5 3.0 2.5 2.0 1.5 1.0 ppm

2.08  
2.00

1.00  
1.01

2.01

4.08

4.19  
2.04

CDC13  
100 MHz

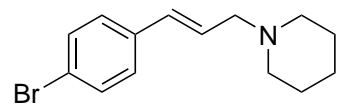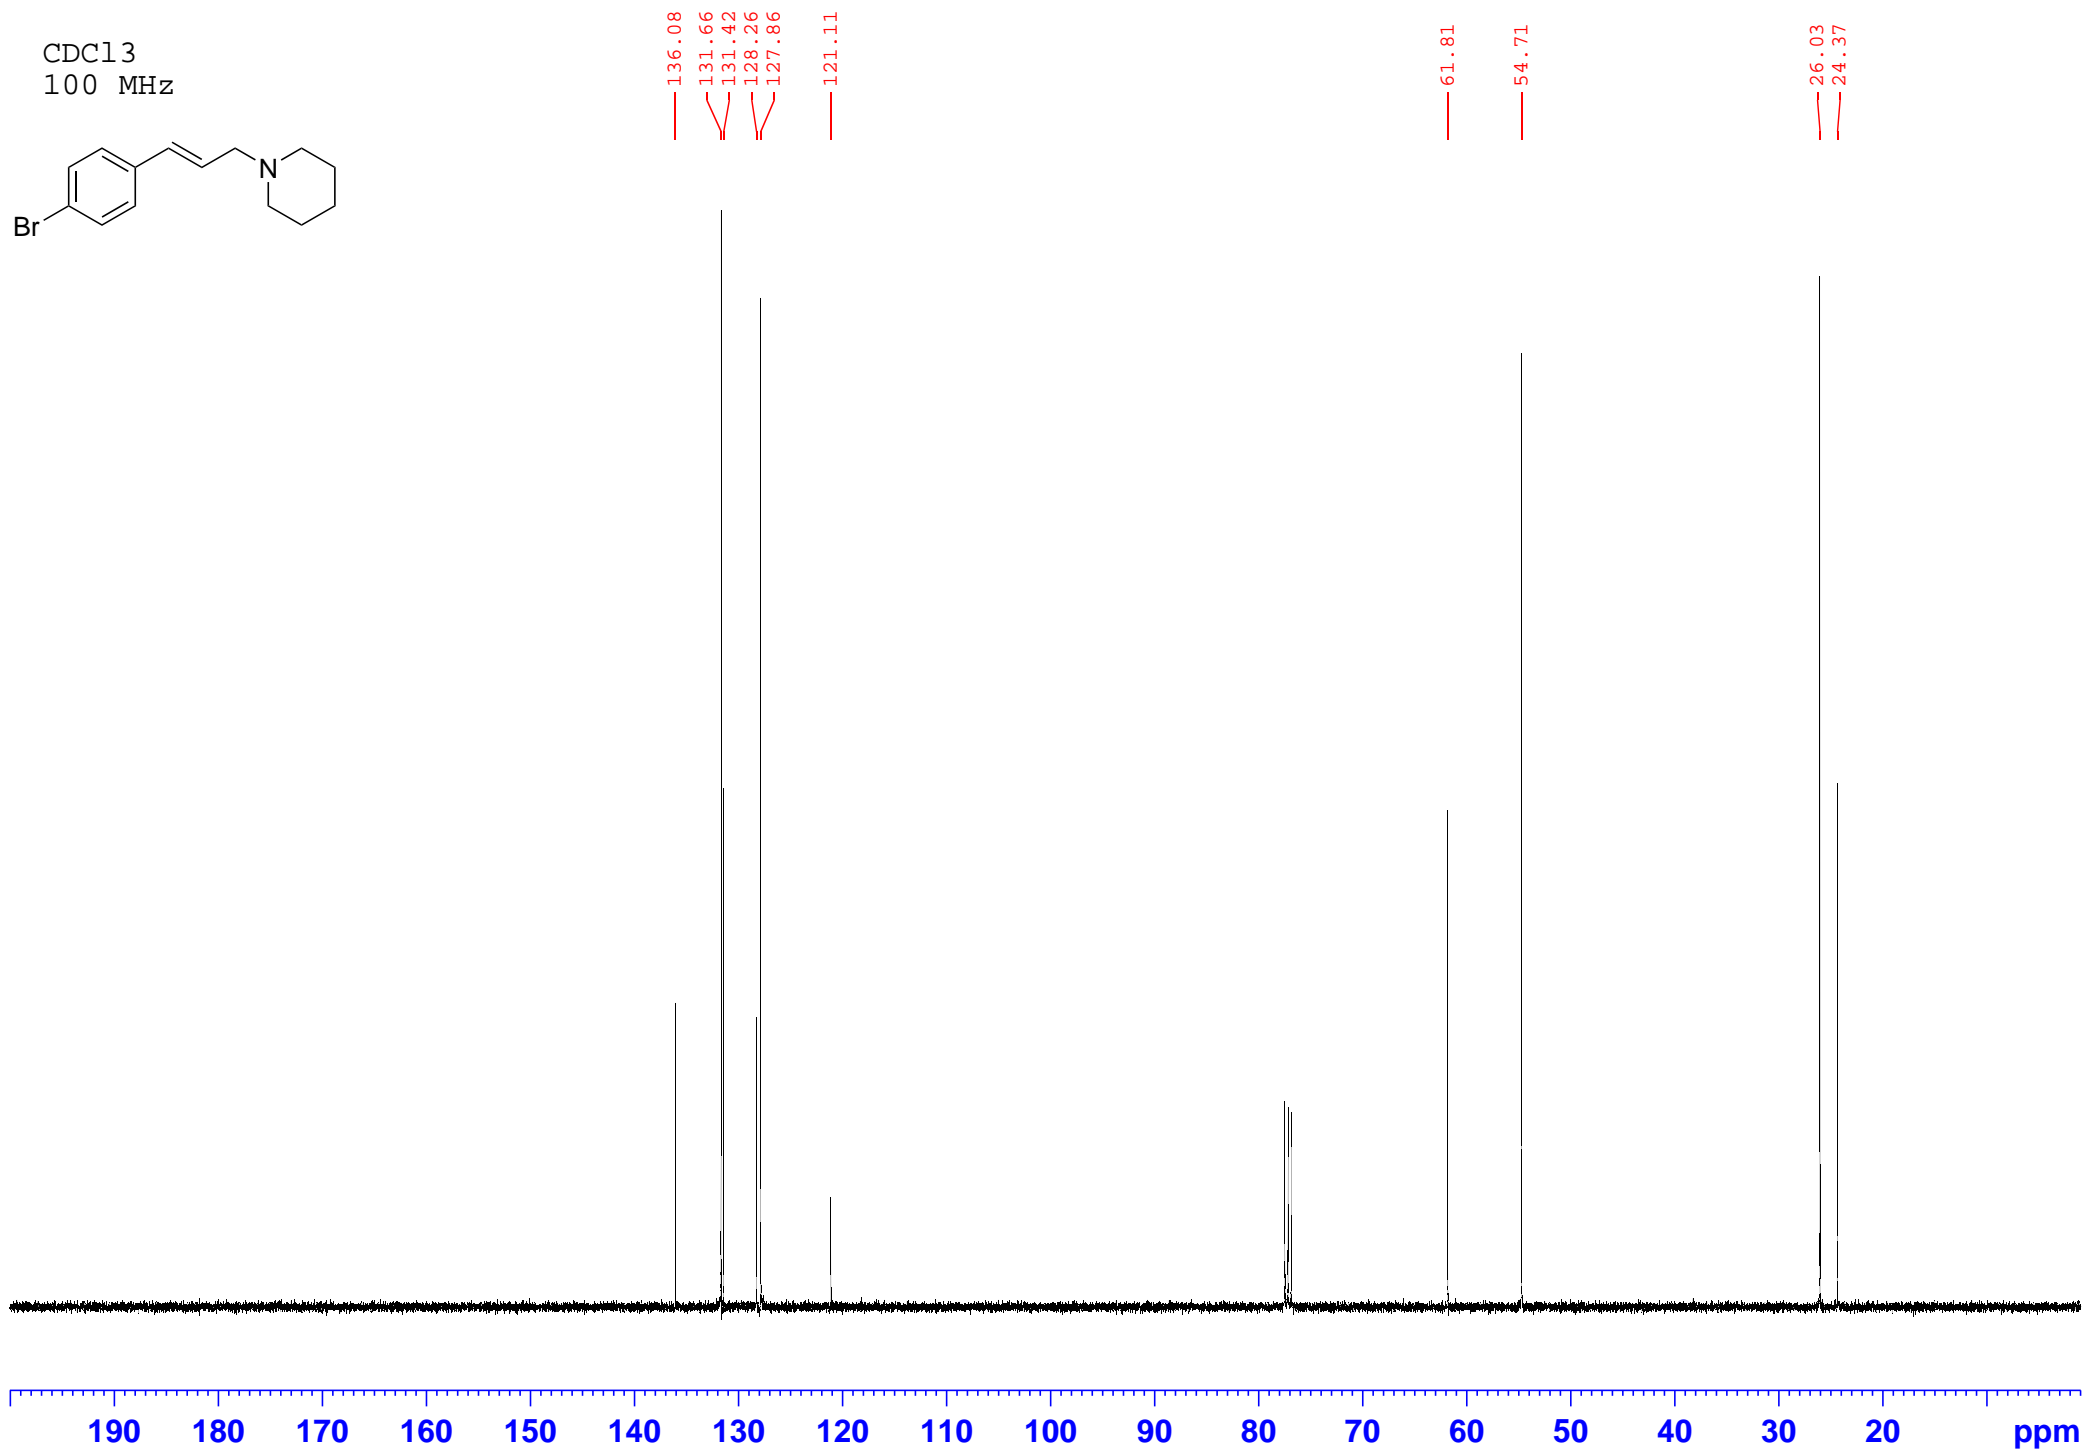

CDC13  
400 MHz

— 8.869

7.084  
7.063  
6.711  
6.690  
6.413  
6.374  
6.011  
5.993  
5.975  
5.954  
5.936

3.135  
3.118

— 2.565

1.701  
1.688  
1.674  
1.660  
1.647  
1.478

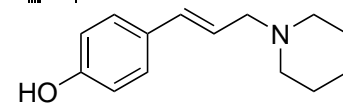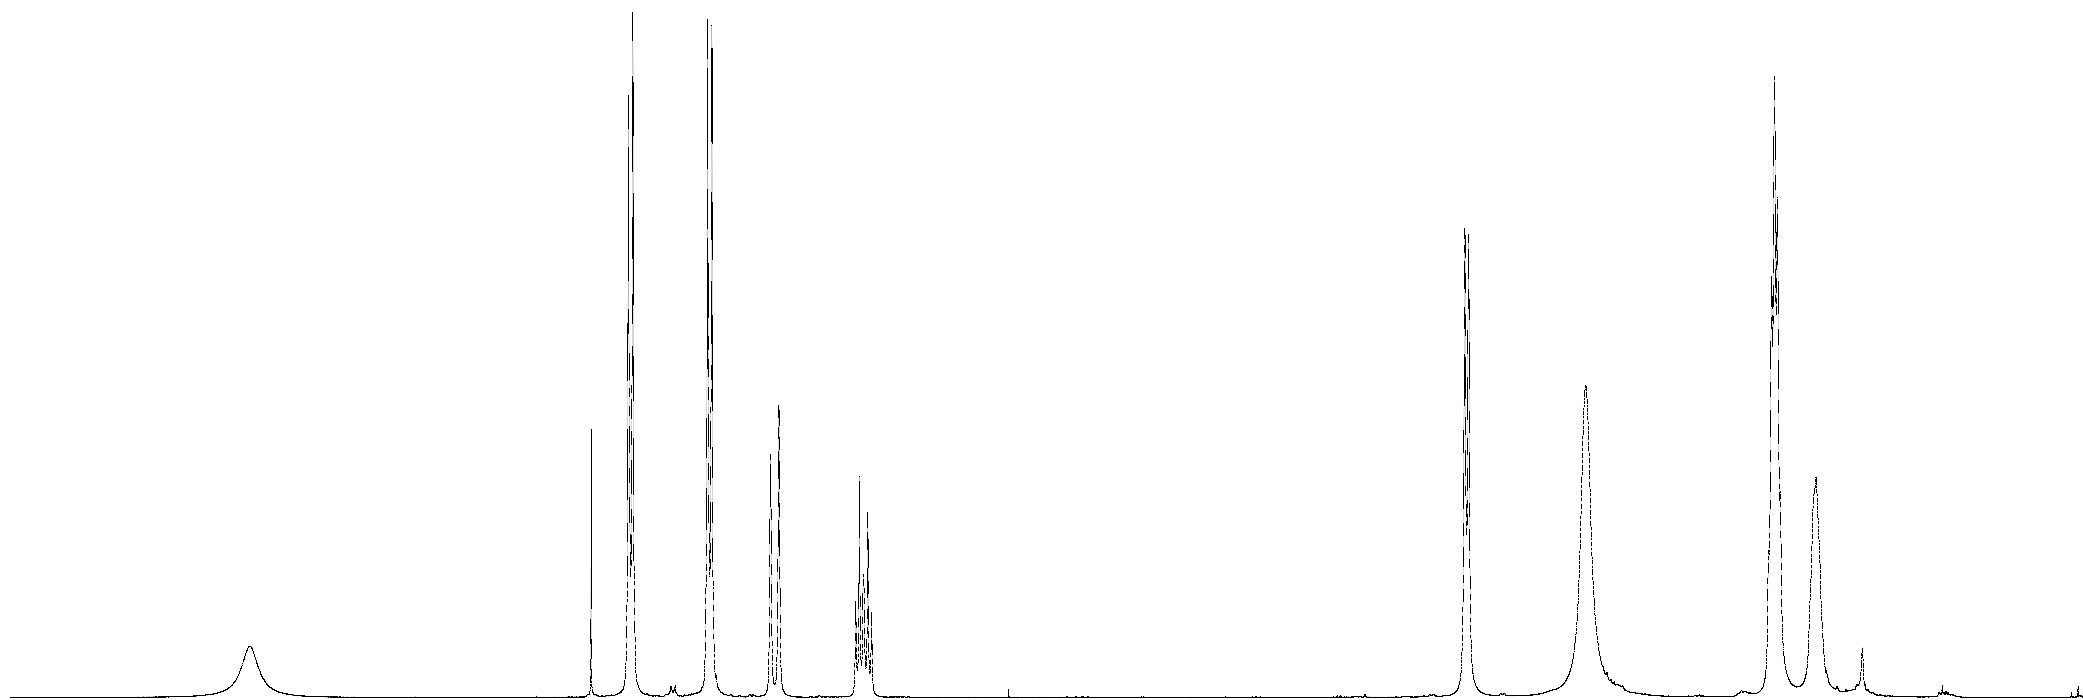

9.5 9.0 8.5 8.0 7.5 7.0 6.5 6.0 5.5 5.0 4.5 4.0 3.5 3.0 2.5 2.0 1.5 1.0 ppm

1.05

2.00

2.04

1.00

1.00

2.04

4.04

4.11

2.03



CDC13  
100 MHz

157.02

134.26

128.32  
127.90

122.00

116.44

61.72

54.39

25.16  
24.10

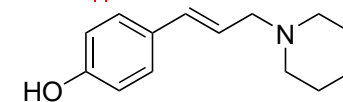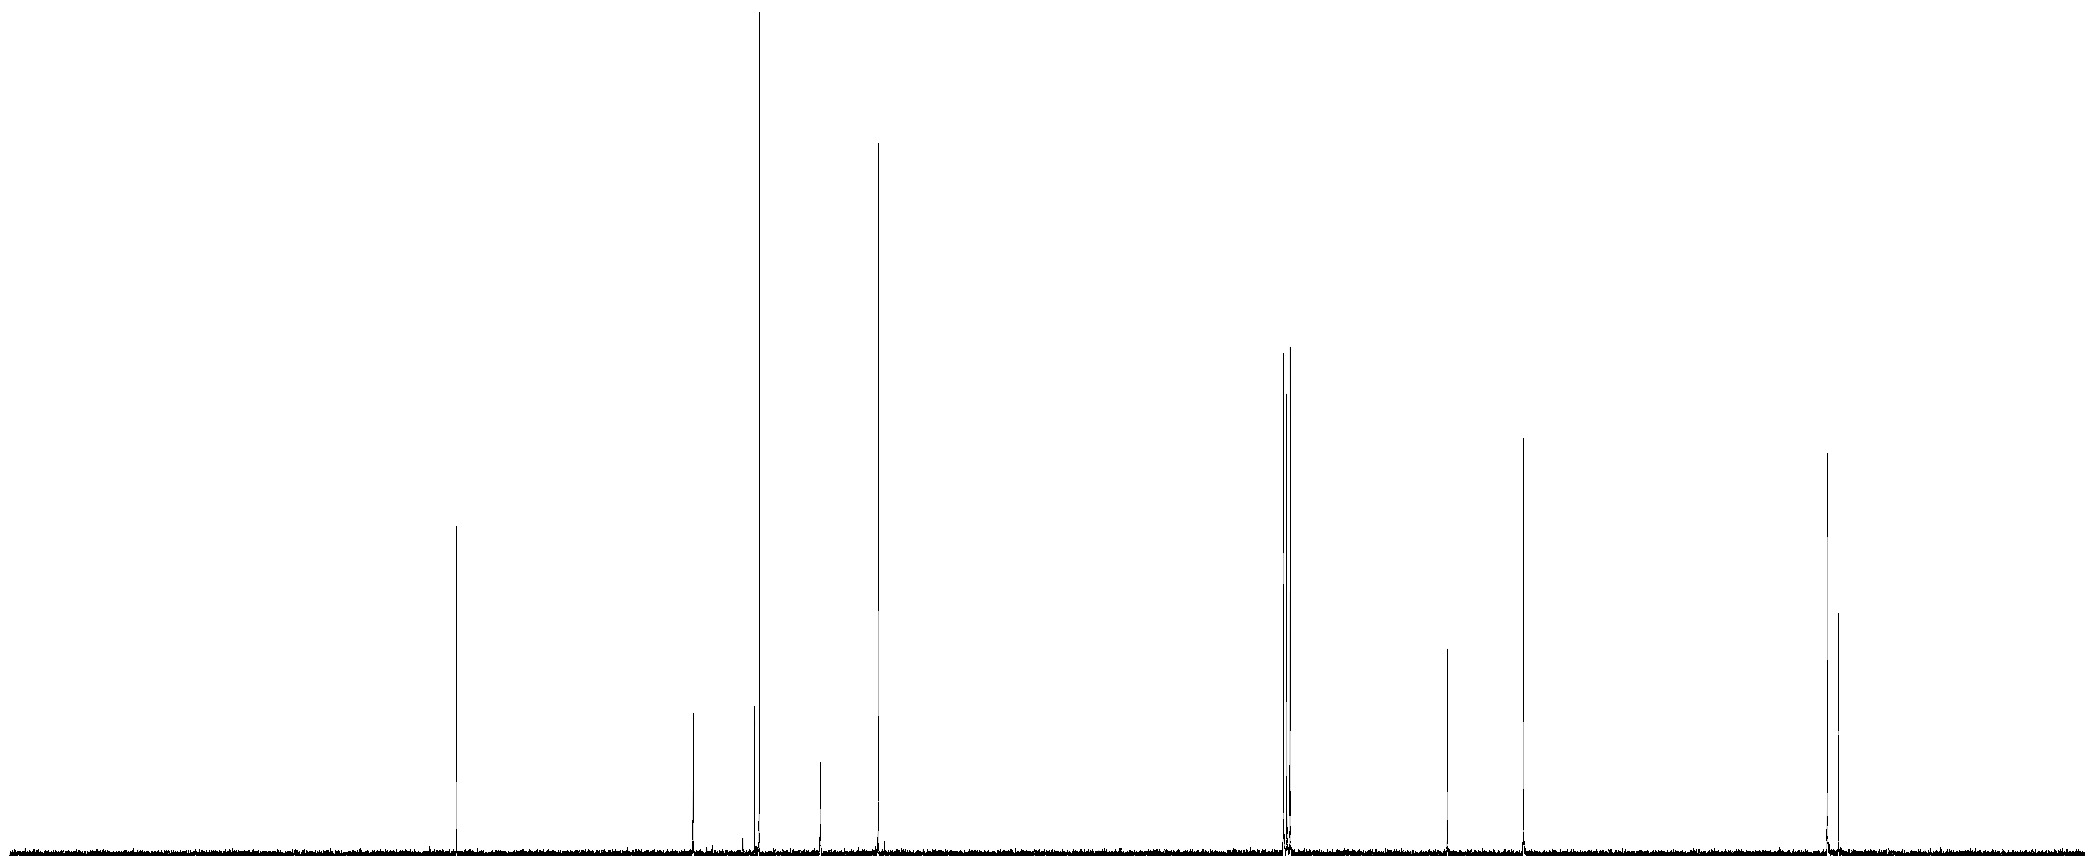

190 180 170 160 150 140 130 120 110 100 90 80 70 60 50 40 30 20 10 ppm

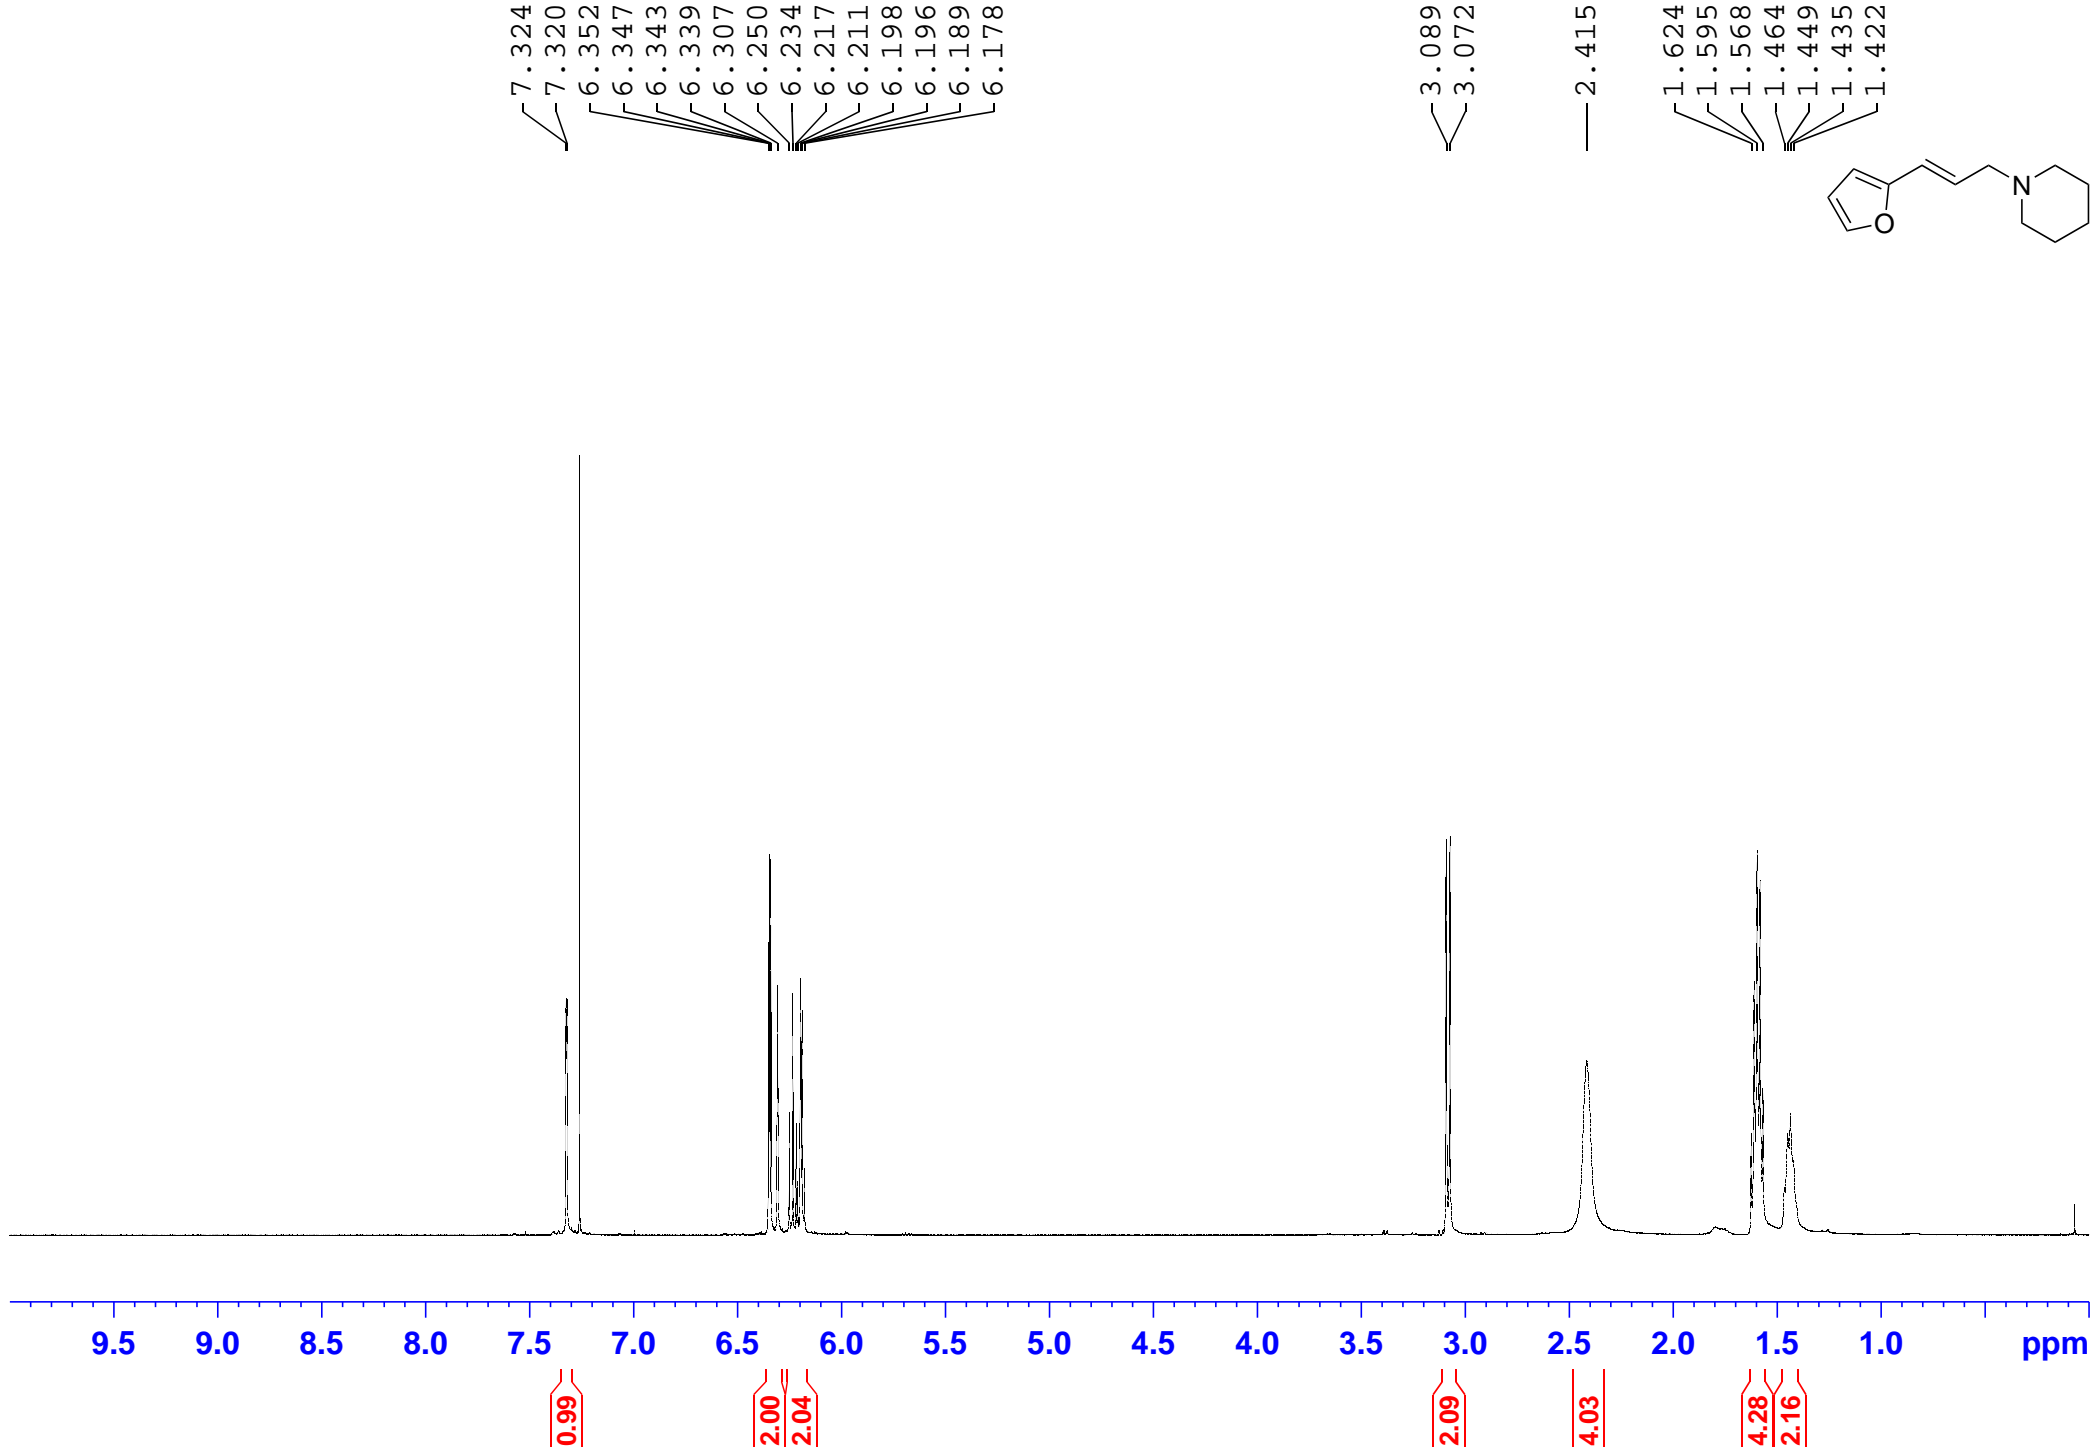

CDC13  
100 MHz

152.86

141.85

126.17

121.20

111.25

107.17

61.67

54.66

26.12

24.45

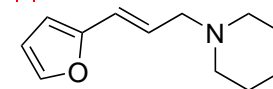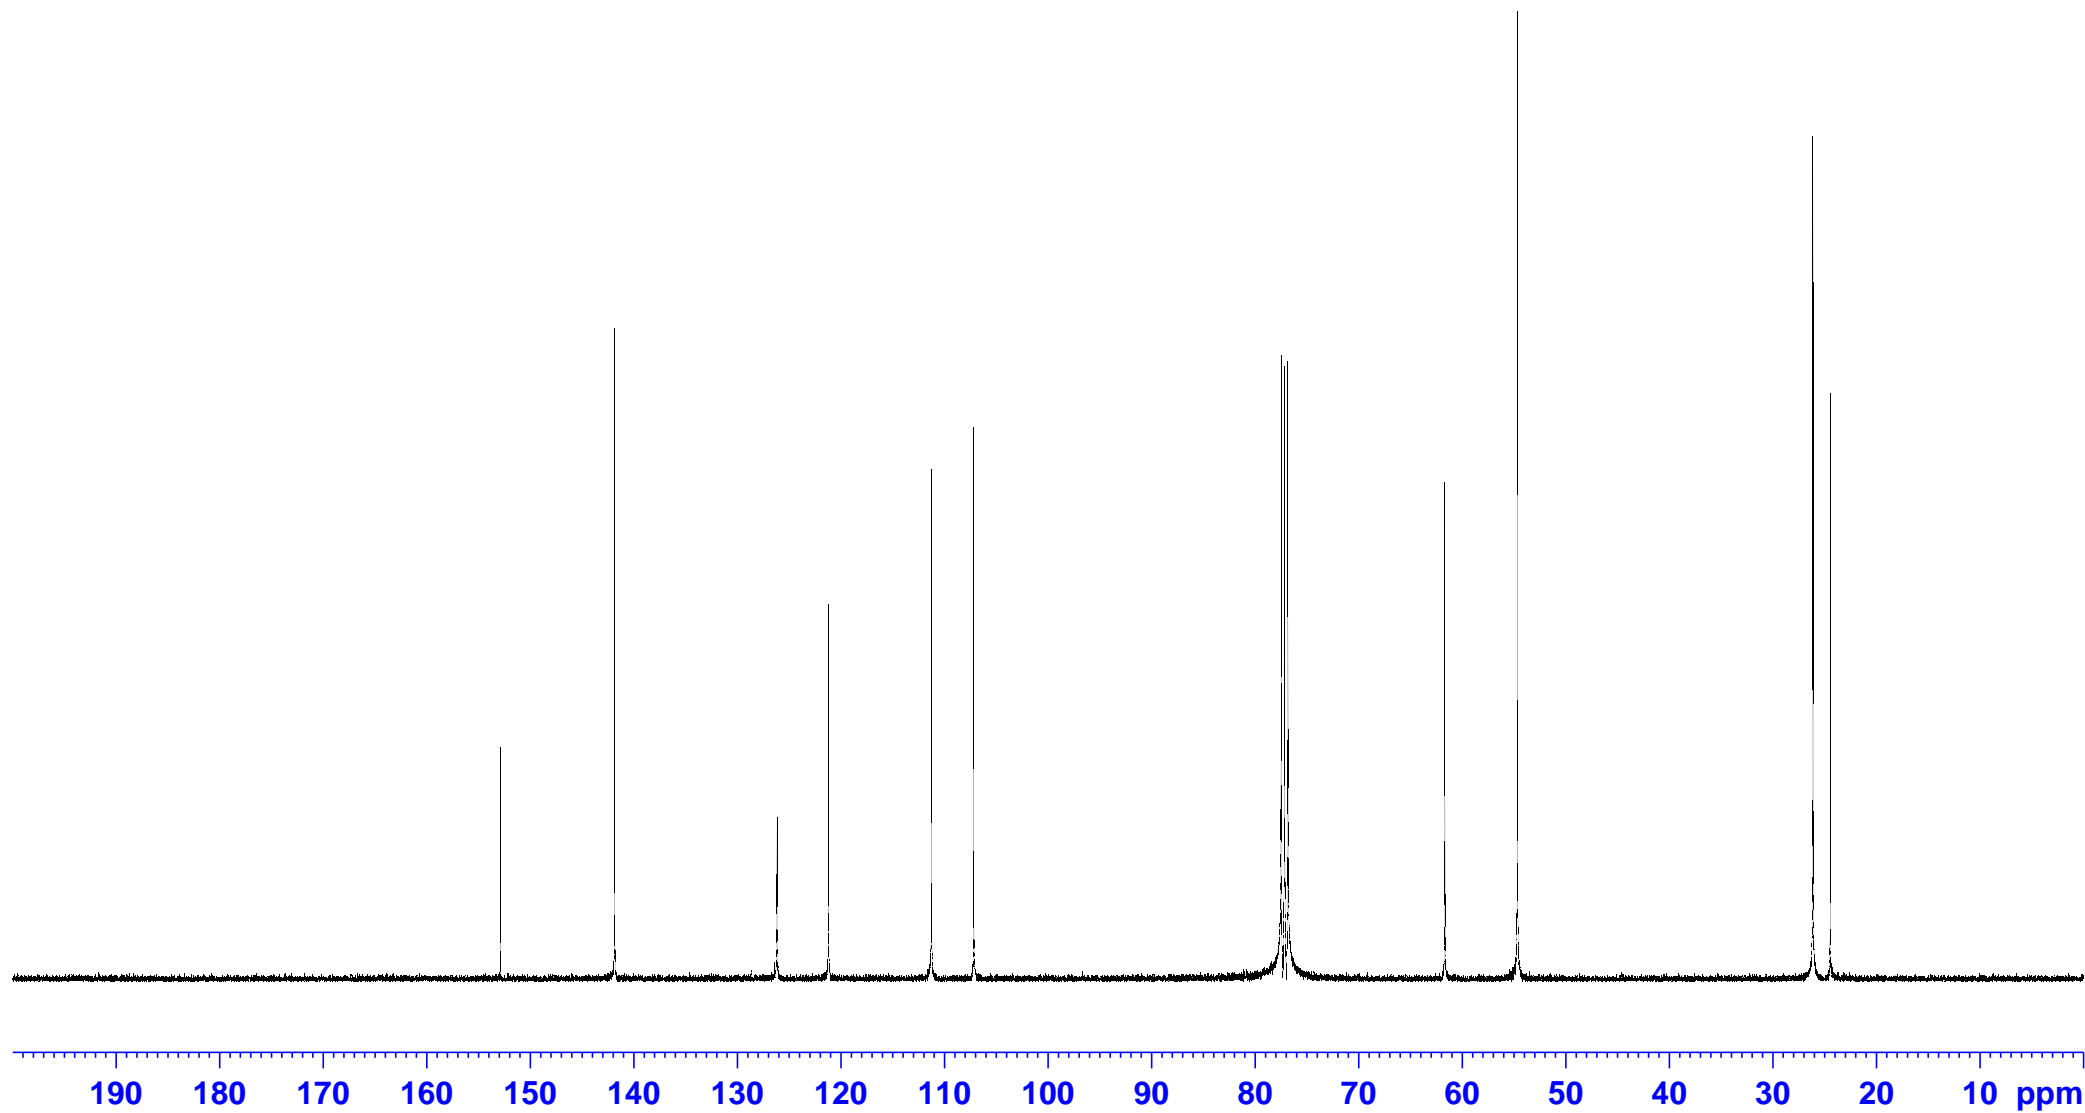

CDC13  
400 MHz

7.126  
7.113  
6.951  
6.942  
6.938  
6.930  
6.919  
6.913  
6.642  
6.603  
6.170  
6.153  
6.136  
6.131  
6.114  
6.097

3.084  
3.064

2.419

1.630  
1.601  
1.574  
1.471  
1.456  
1.442  
1.428

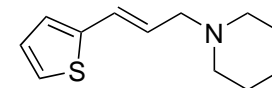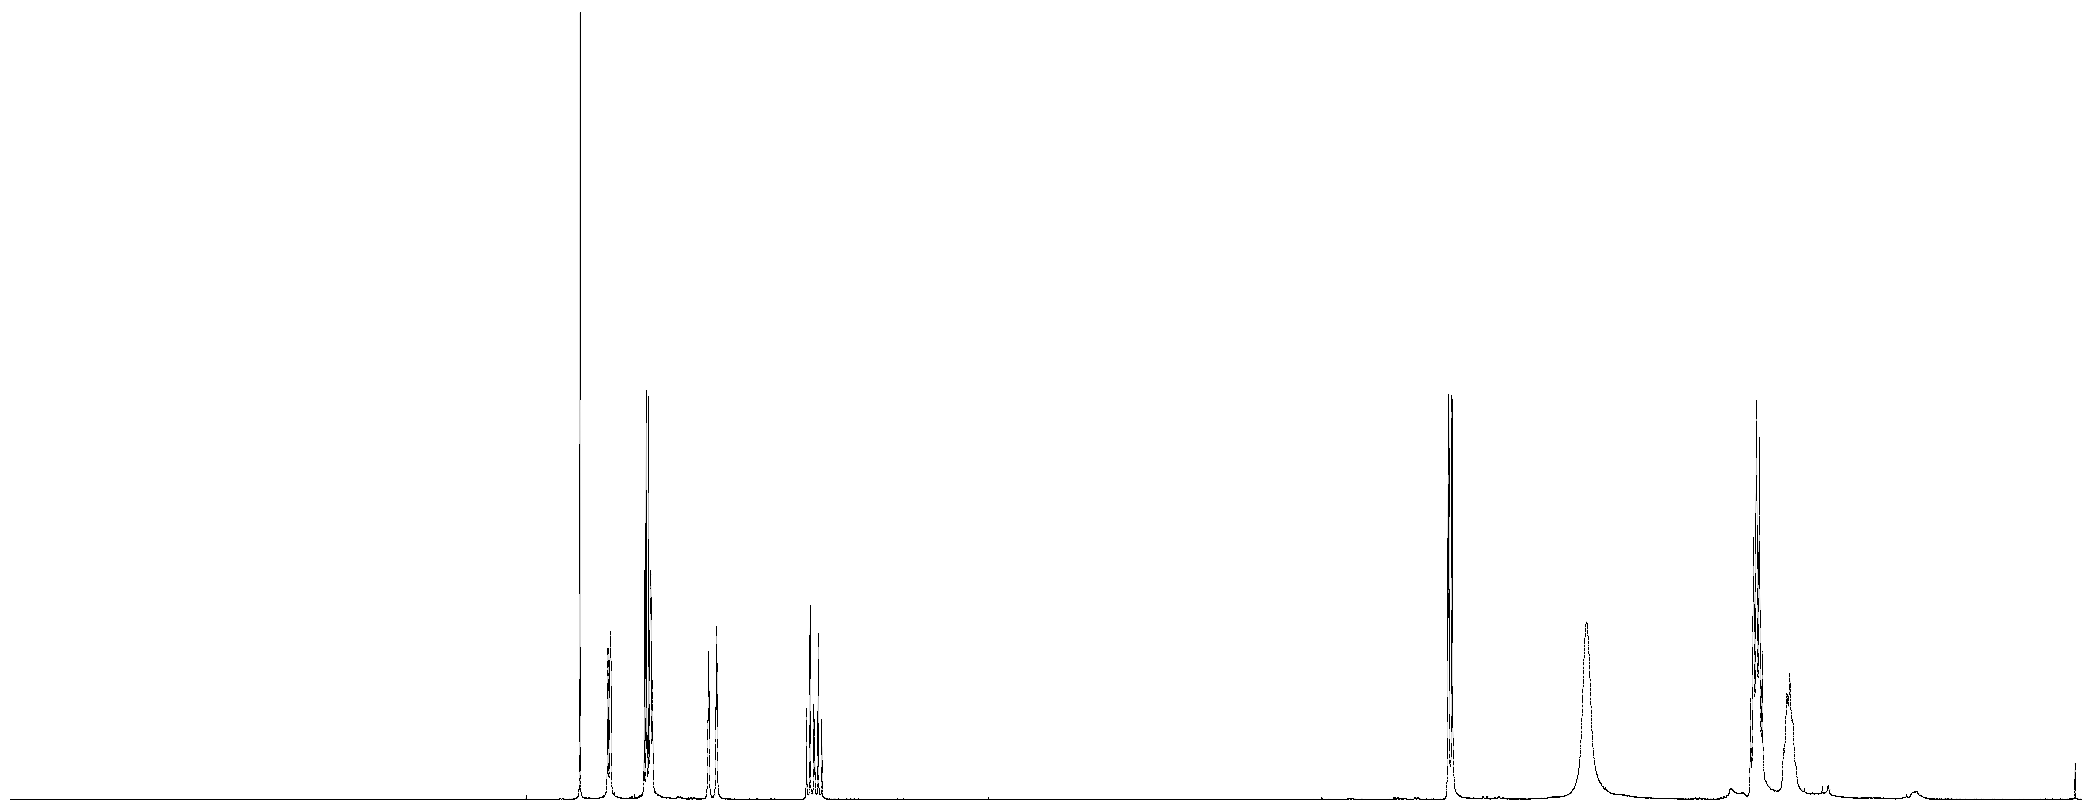

9.5 9.0 8.5 8.0 7.5 7.0 6.5 6.0 5.5 5.0 4.5 4.0 3.5 3.0 2.5 2.0 1.5 1.0 ppm

1.04  
2.06  
1.02  
1.00  
2.04  
4.02  
4.25  
2.17

CDC13  
100 MHz

142.45

127.38  
127.26  
125.83  
125.19  
124.03

61.74

54.74

26.14  
24.47

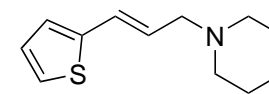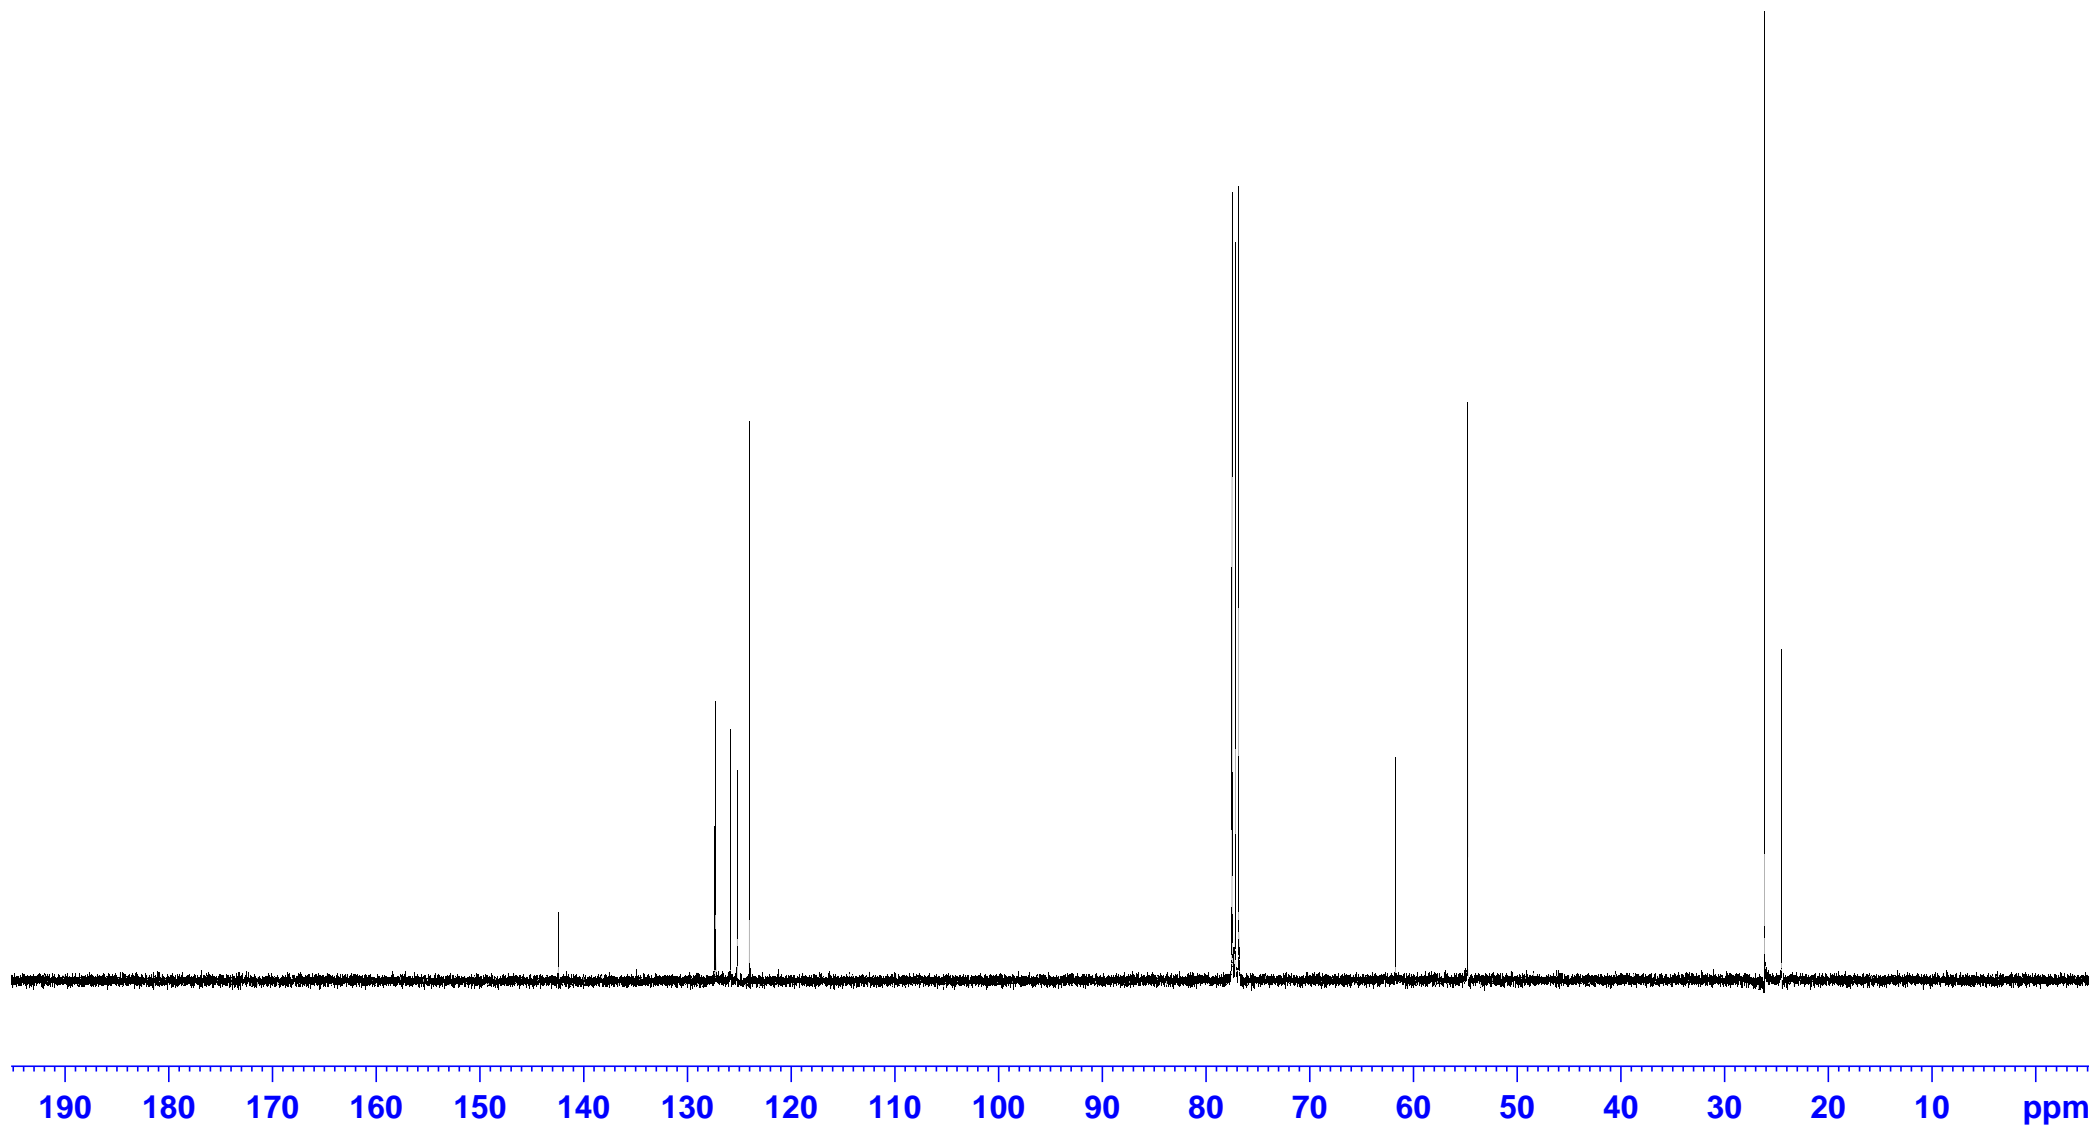

7.391  
7.371  
7.354  
7.343  
7.327  
7.273  
7.260  
7.242  
7.225  
6.518  
6.480

3.115  
3.112  
3.026  
3.023  
2.423  
2.324  
2.014  
2.010  
1.974  
1.971  
1.679  
1.650  
1.623  
1.597  
1.583  
1.570  
1.532  
1.503  
1.488  
1.449  
1.435  
1.418

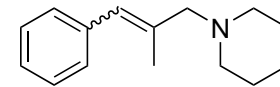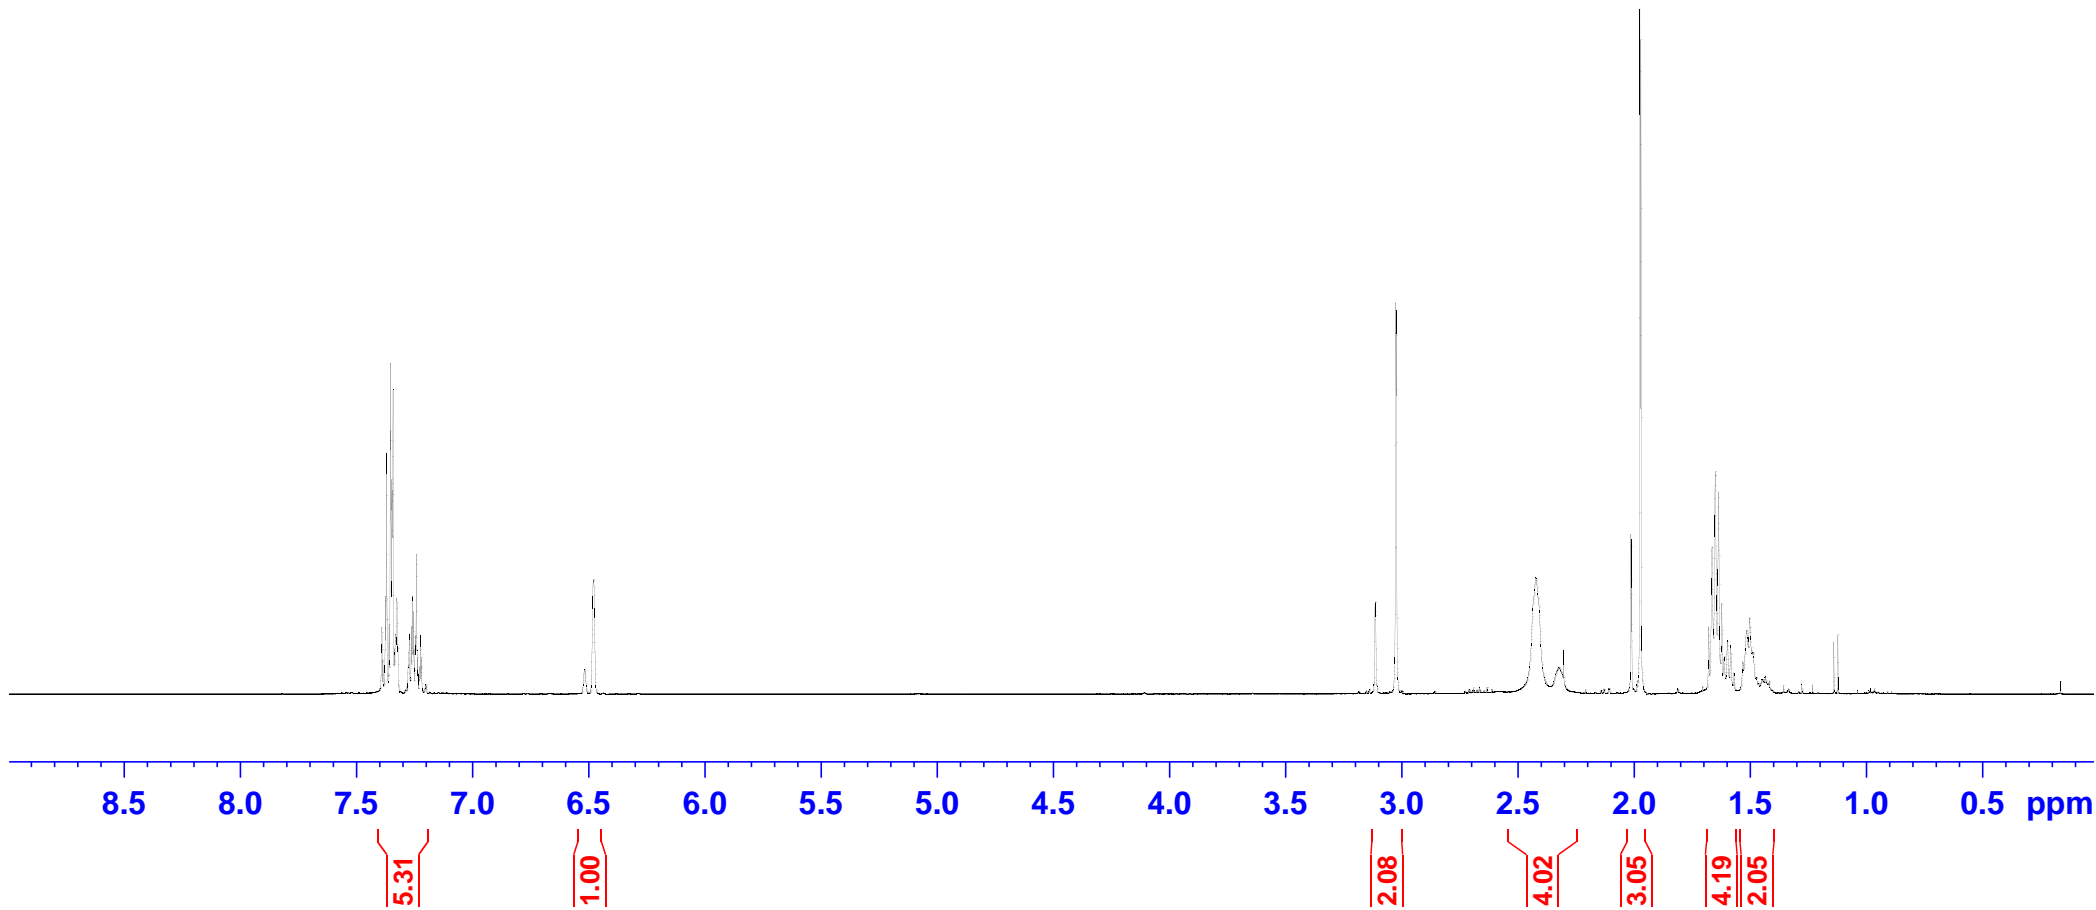

CDC13  
100 MHz

138.22  
138.16  
137.28  
136.47  
129.16  
128.96  
128.61  
128.10  
127.97  
127.12  
126.17  
126.09

68.76

59.75

54.72  
54.53

26.14  
24.64  
24.52  
23.24  
16.96

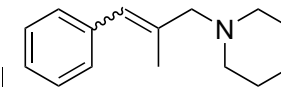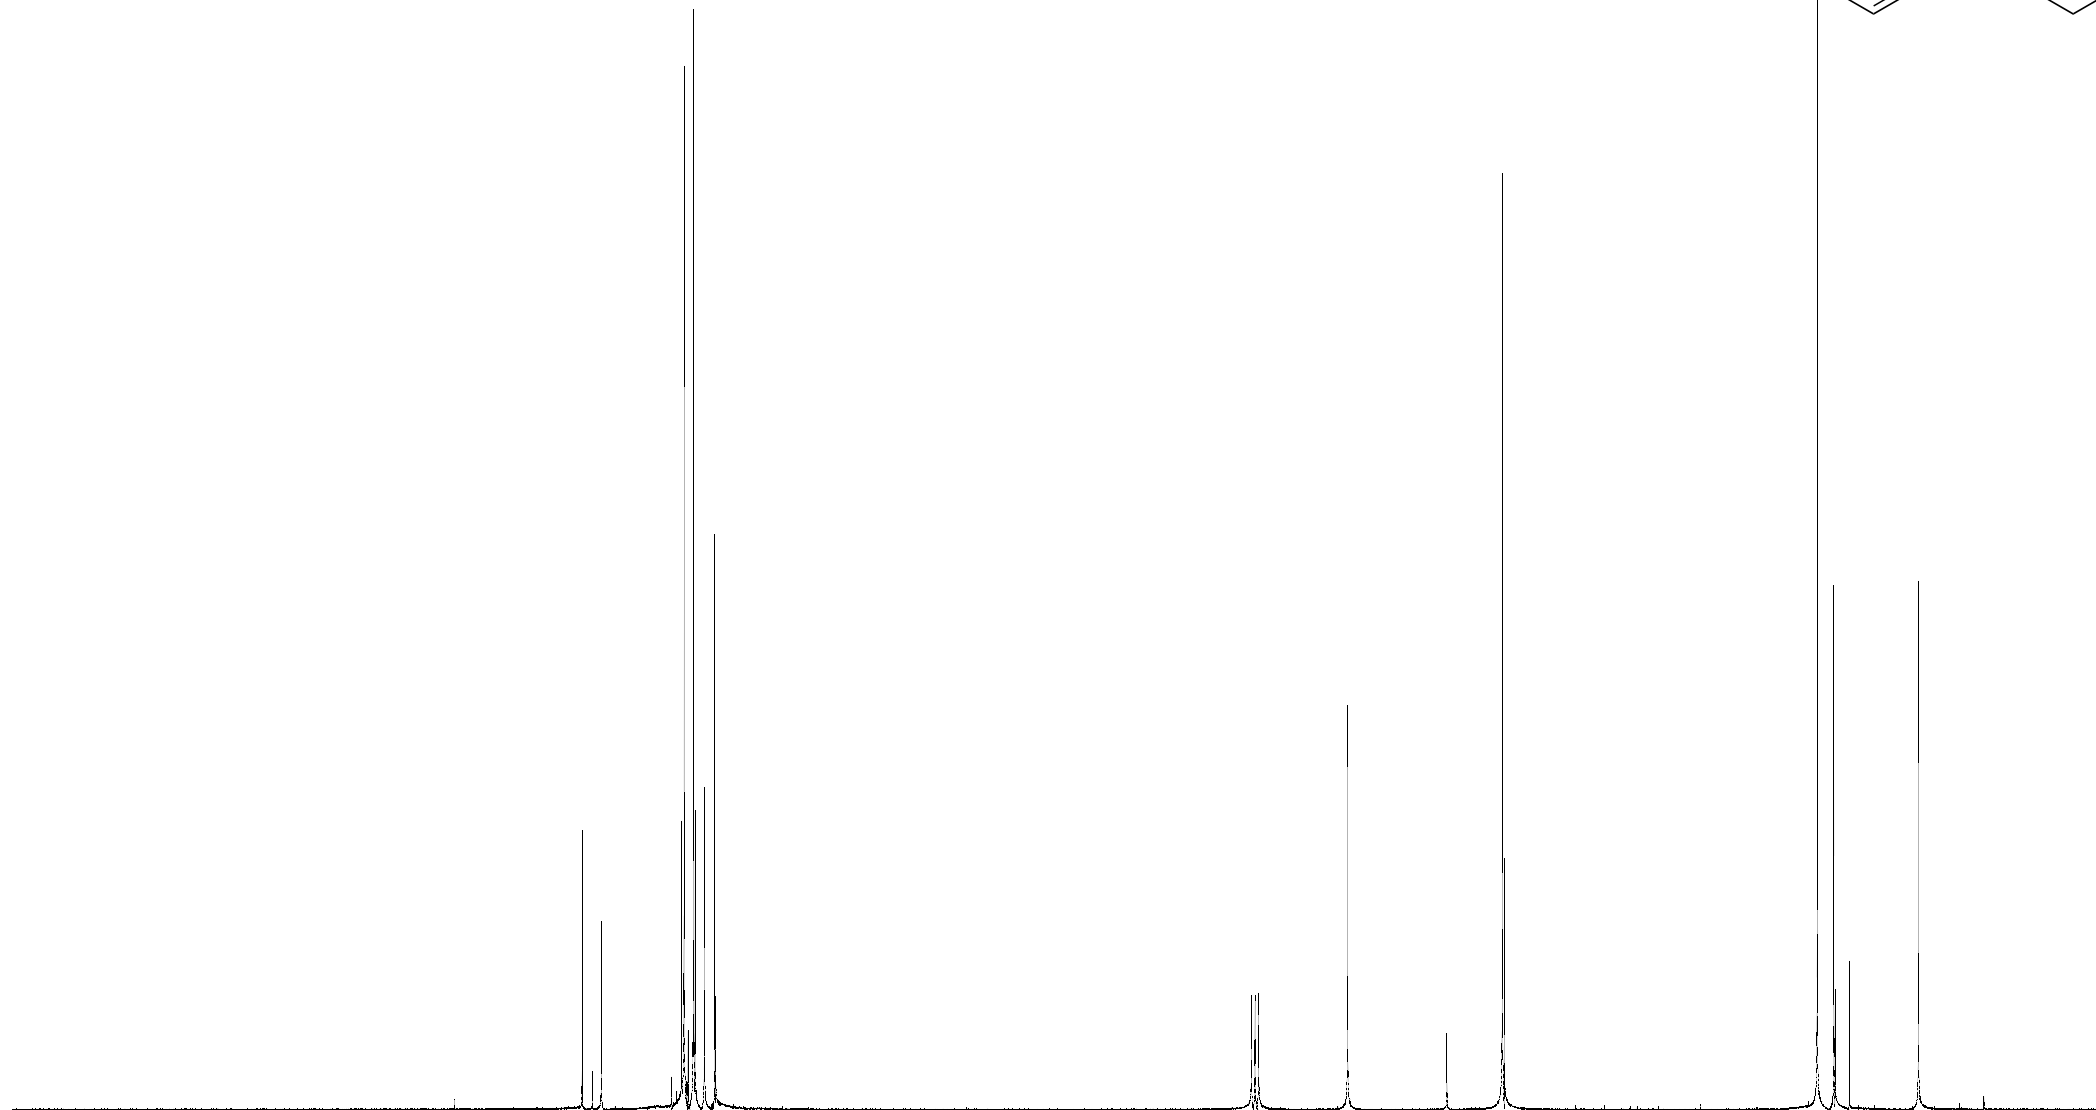

180 170 160 150 140 130 120 110 100 90 80 70 60 50 40 30 20 10 ppm

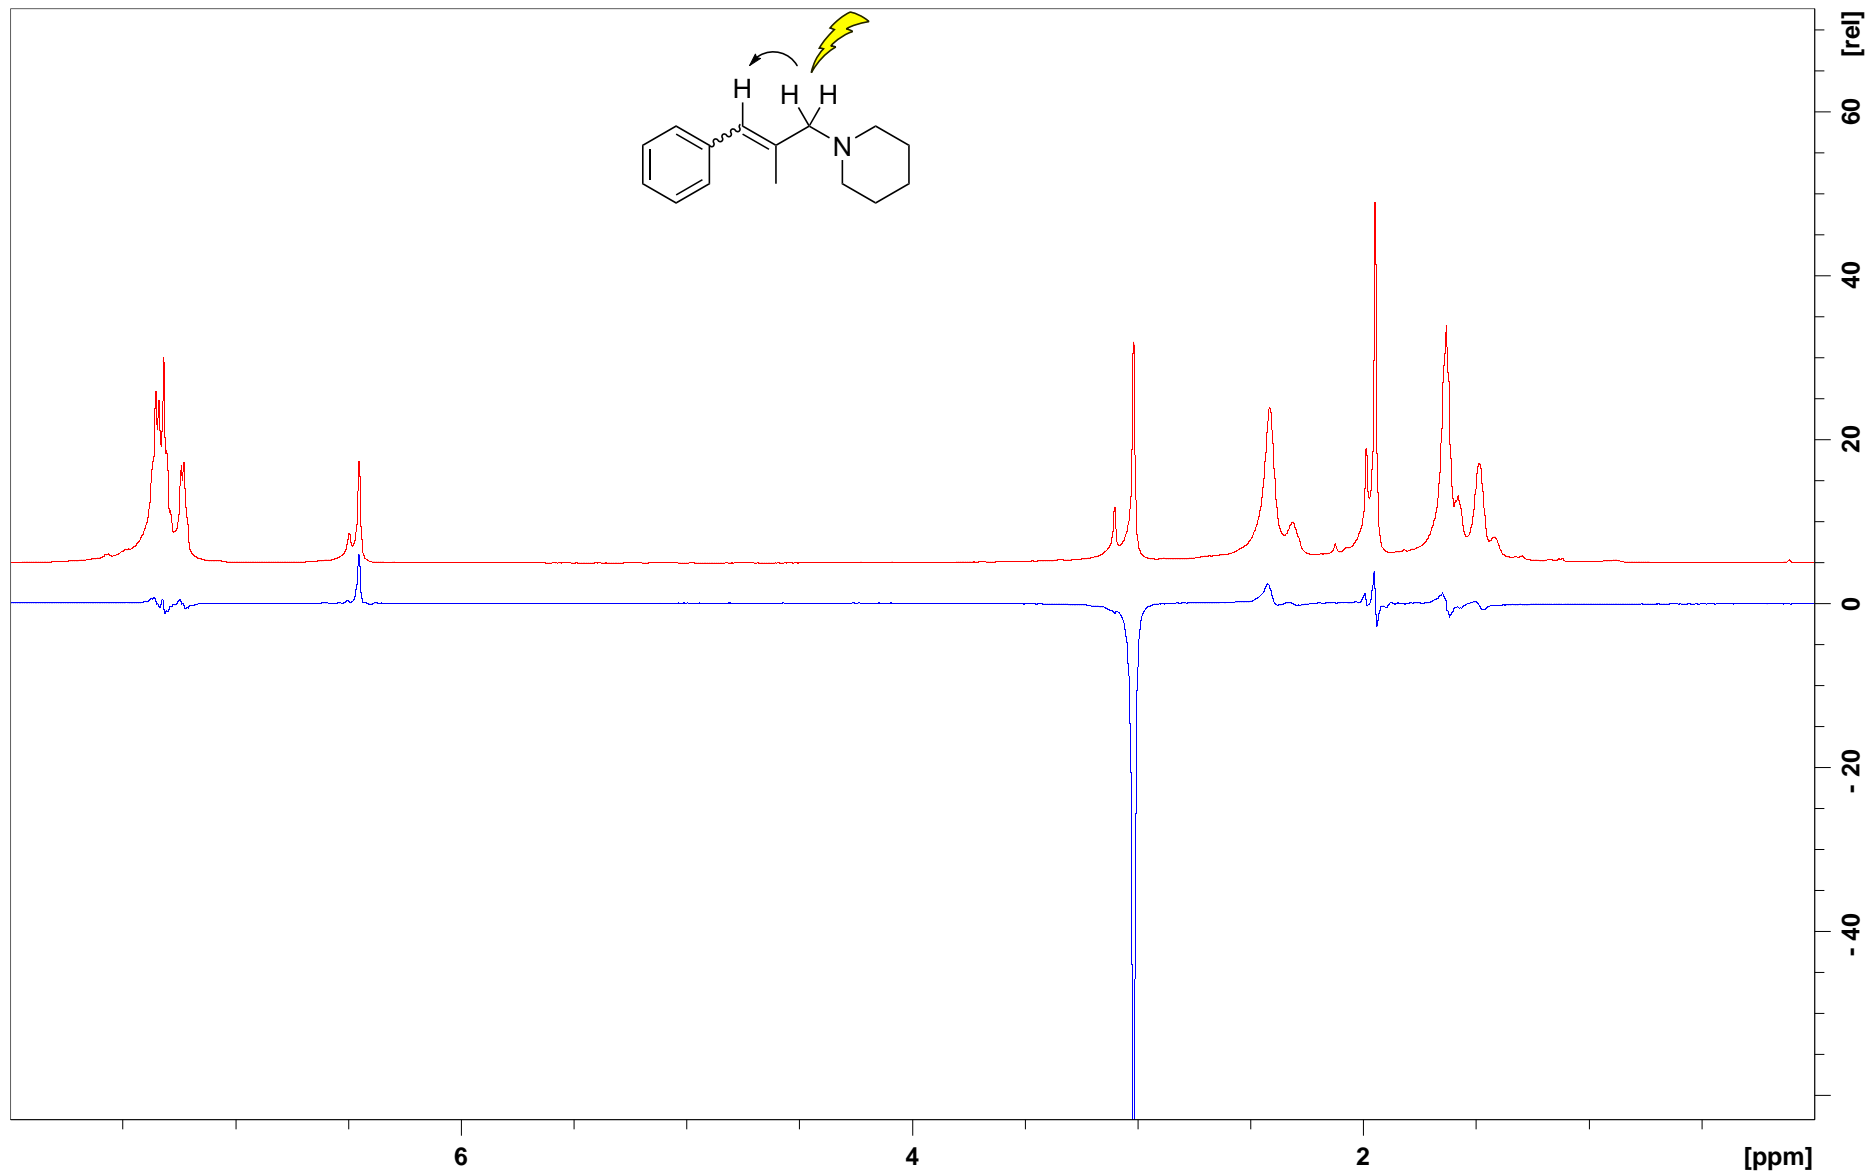



CDC13  
400 MHz

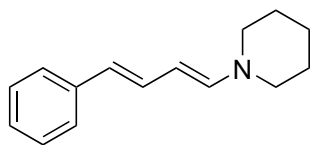

7.307  
7.287  
7.260  
7.241  
7.221  
7.221  
7.091  
7.073  
7.055  
6.785  
6.759  
6.747  
6.721  
6.323  
6.289  
6.203  
6.164  
6.099  
5.362  
5.336  
5.329  
5.302

3.006  
2.992

1.577

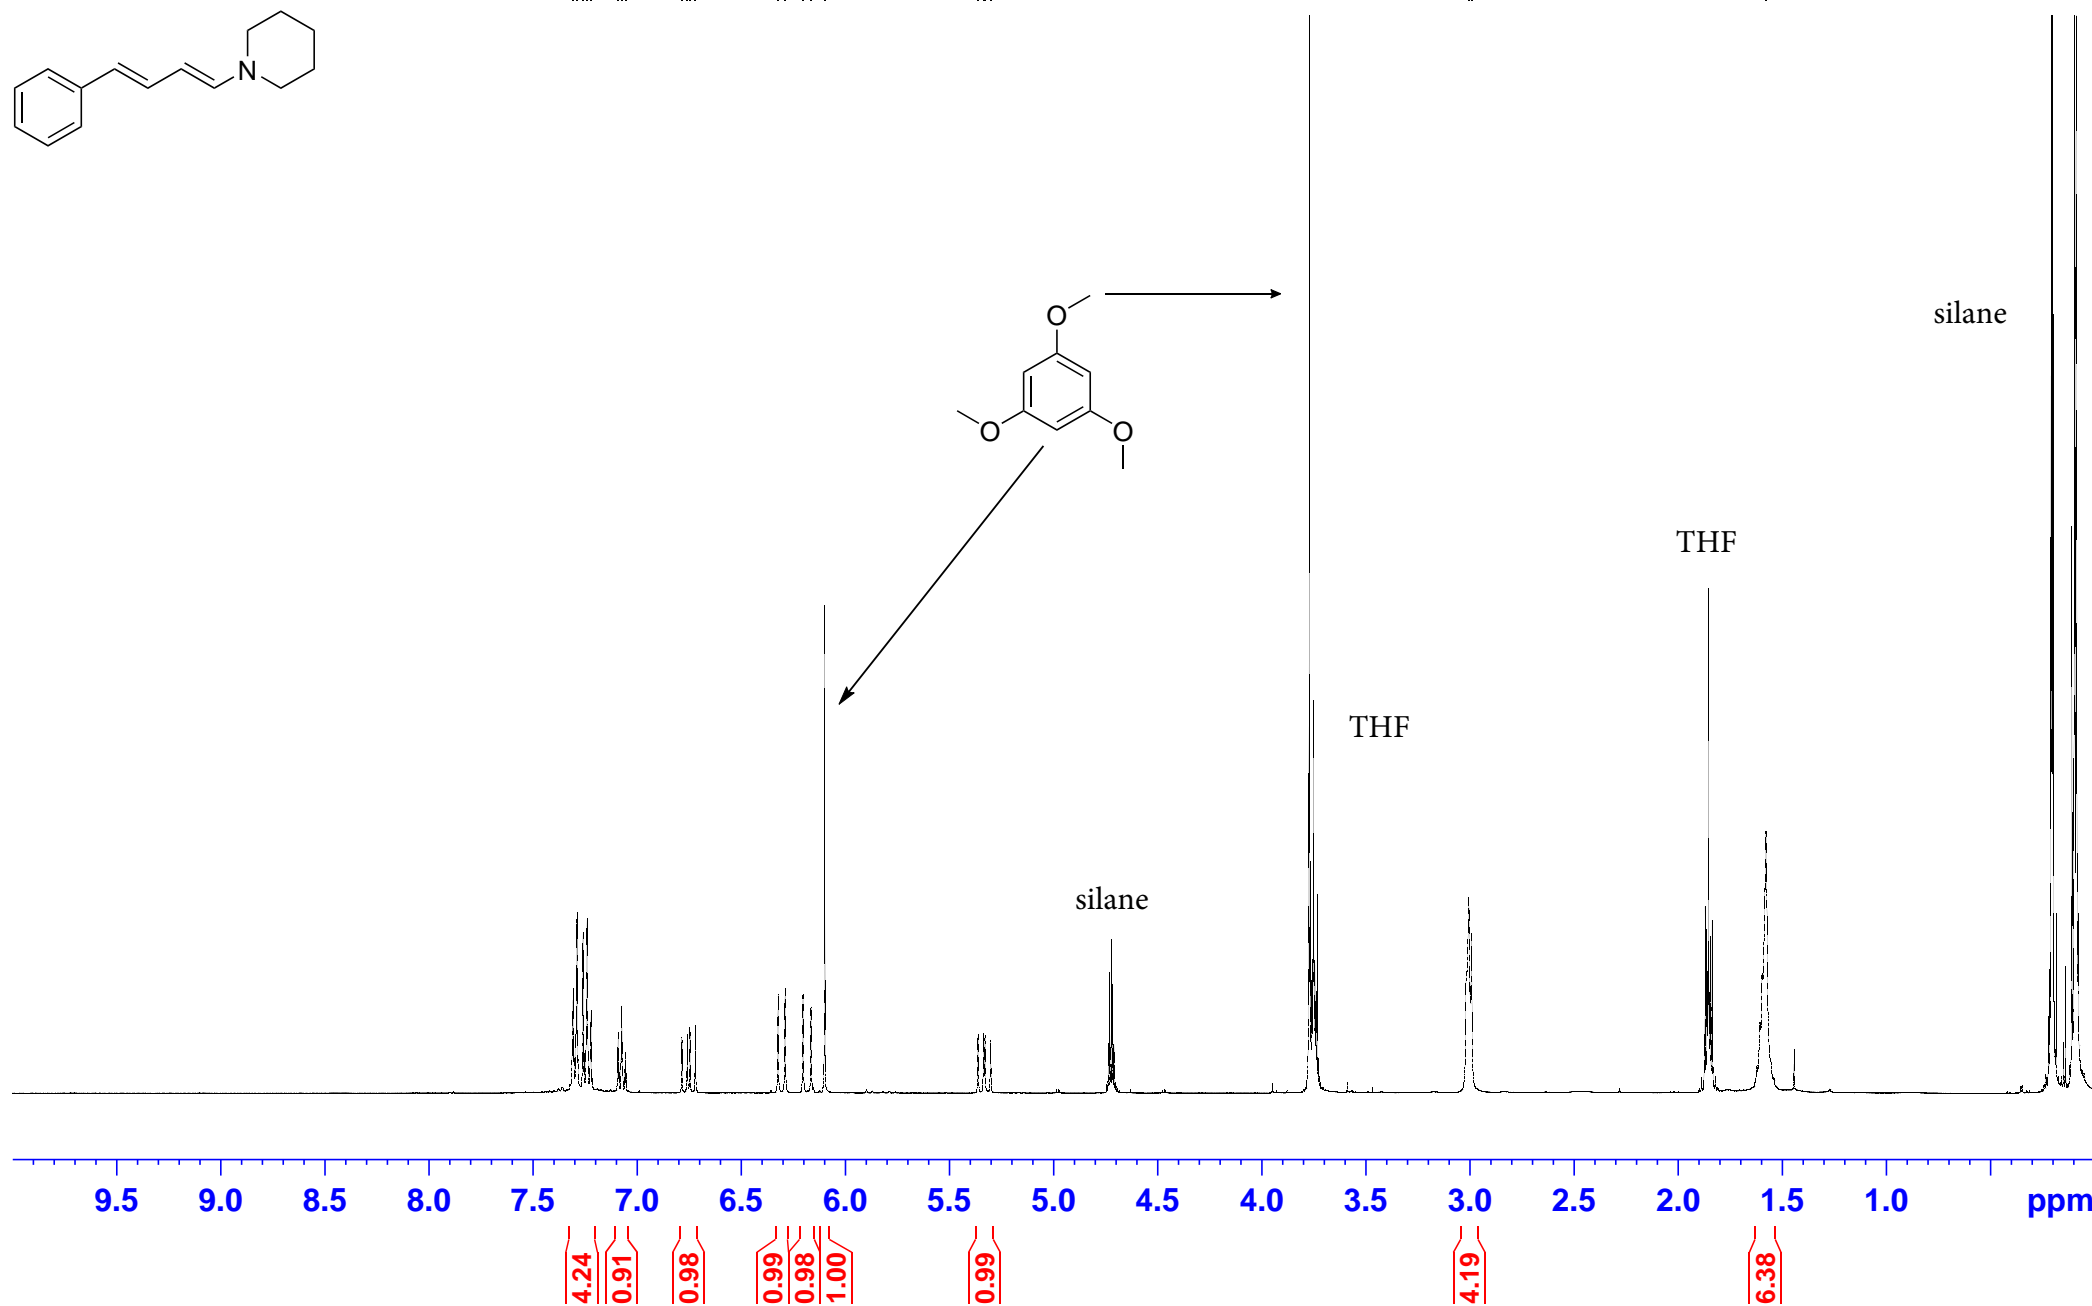

CDC13  
400 MHz

7.444  
7.426  
7.412  
7.395  
7.360  
7.341  
7.294  
7.276  
7.258  
6.619  
6.579  
6.414  
6.399  
6.383  
6.375  
6.359  
6.343

— 3.897

< 3.494  
> 3.482

— 2.657

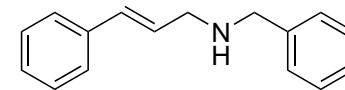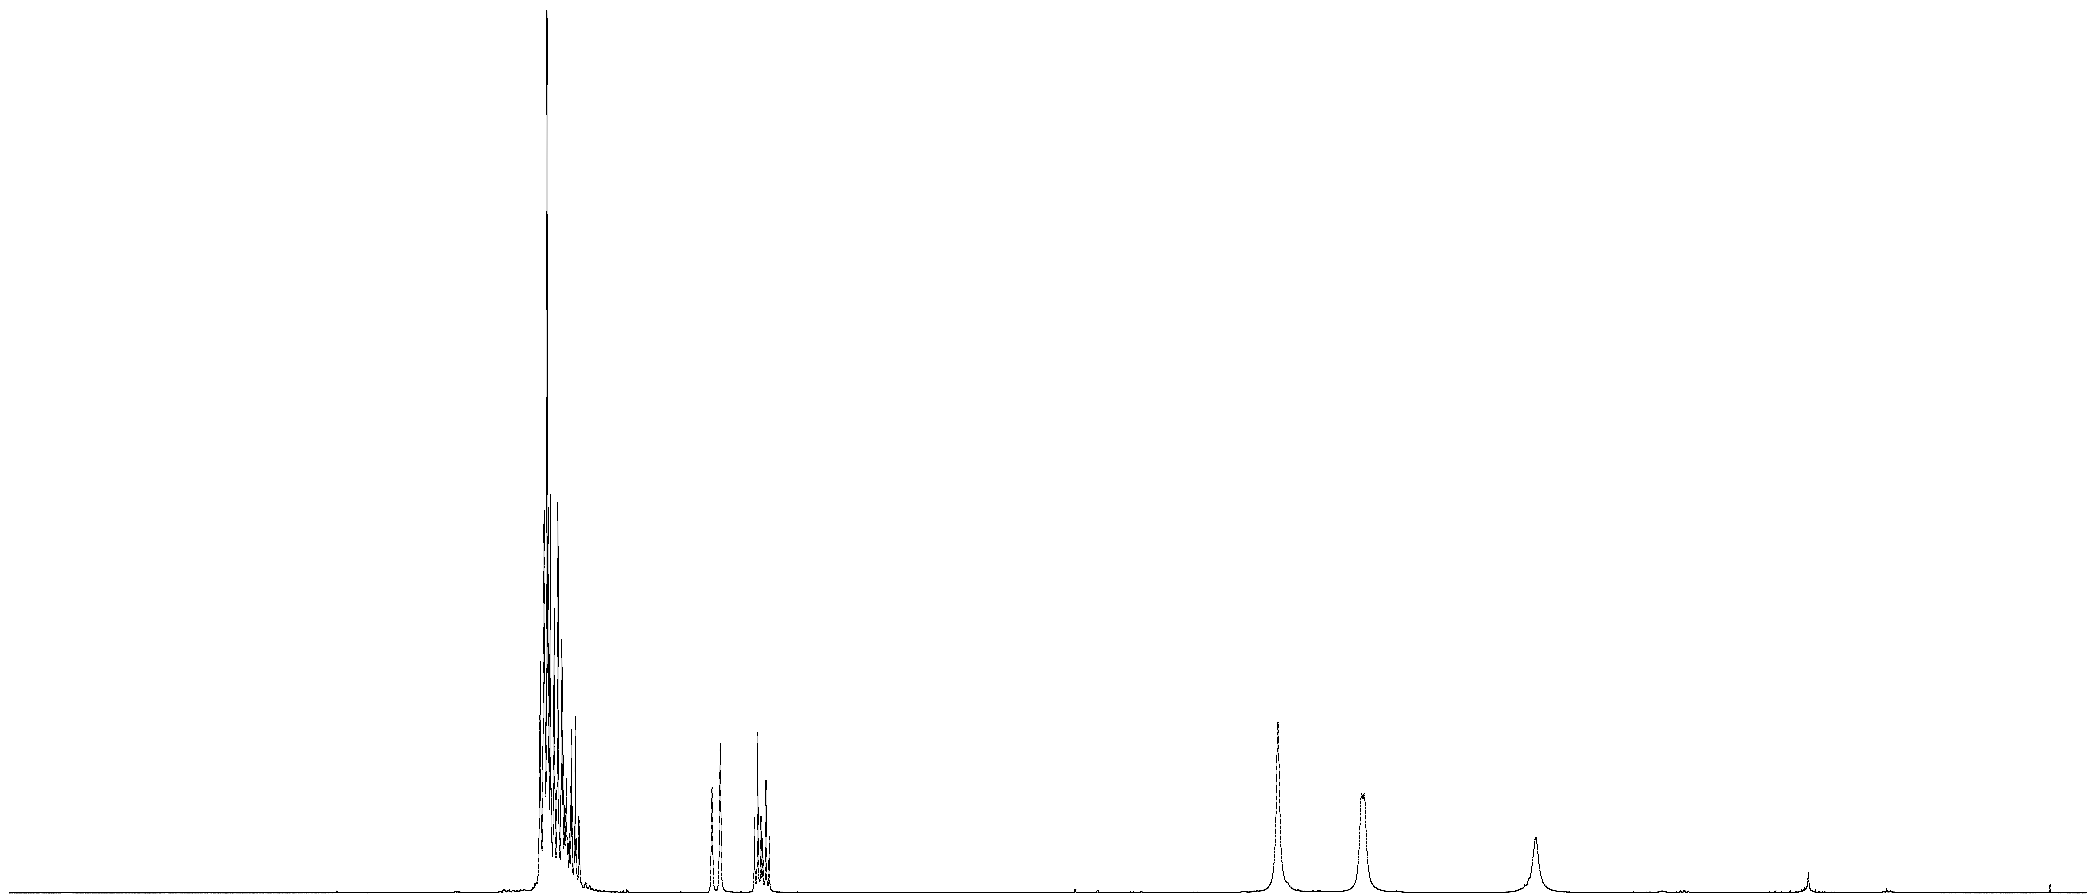

9.5 9.0 8.5 8.0 7.5 7.0 6.5 6.0 5.5 5.0 4.5 4.0 3.5 3.0 2.5 2.0 1.5 1.0 ppm

10.33

1.00

1.02

2.05

2.03

1.15

CDCl<sub>3</sub>  
100 MHz

139.62  
137.03  
131.82  
128.54  
128.47  
128.32  
127.80  
127.43  
127.12  
126.31

53.03  
50.93

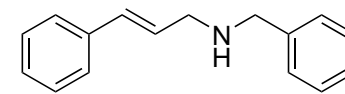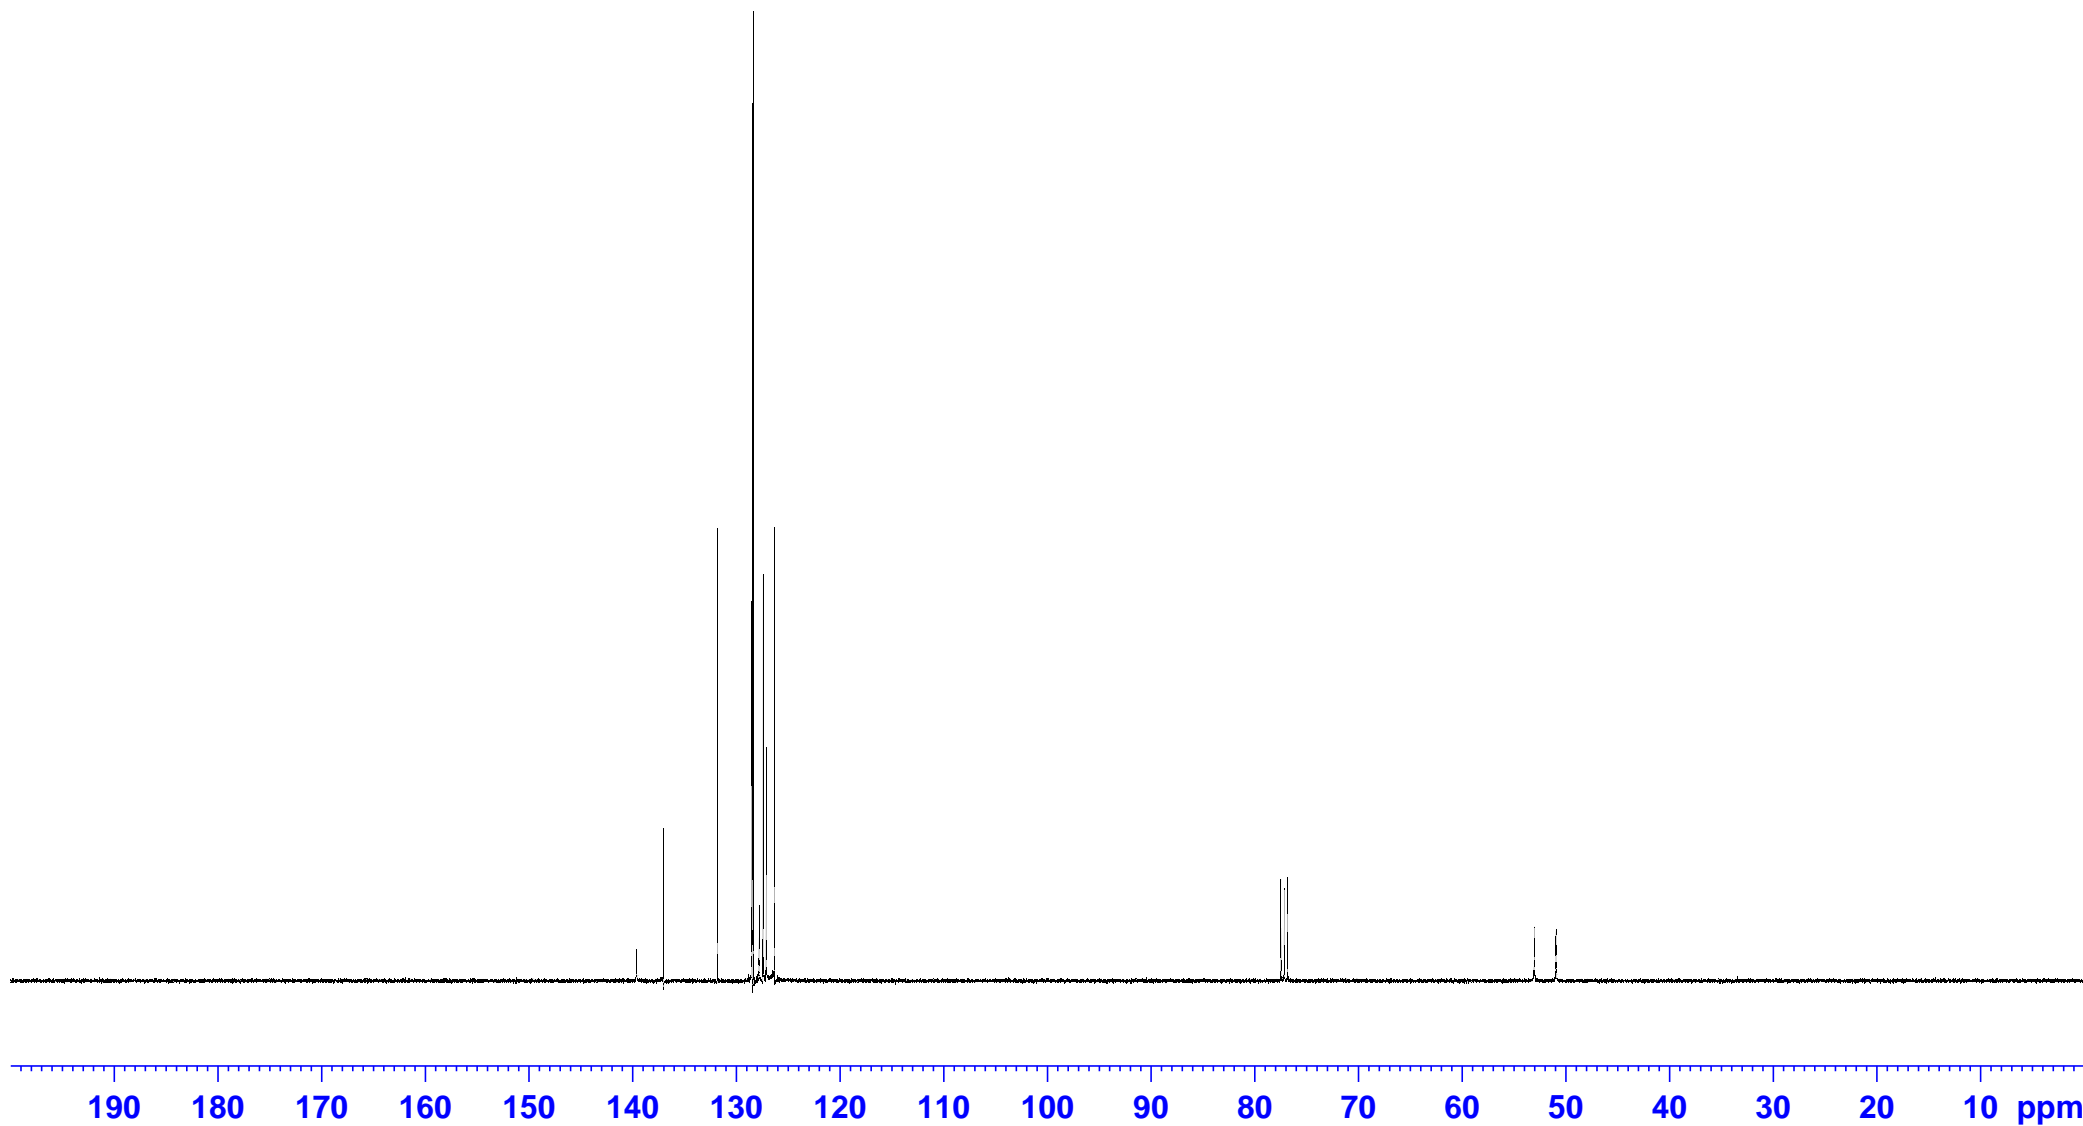

CDC13  
400 MHz

8.069  
8.049  
7.896  
7.876  
7.838  
7.818  
7.708  
7.669  
7.572  
7.559  
7.534  
7.514  
7.494  
7.476  
7.454  
7.434  
7.344  
7.334  
7.327  
6.383  
6.344  
5.908

5.021  
5.007

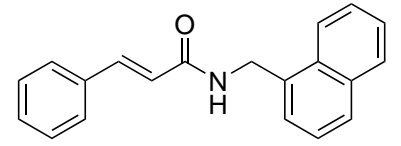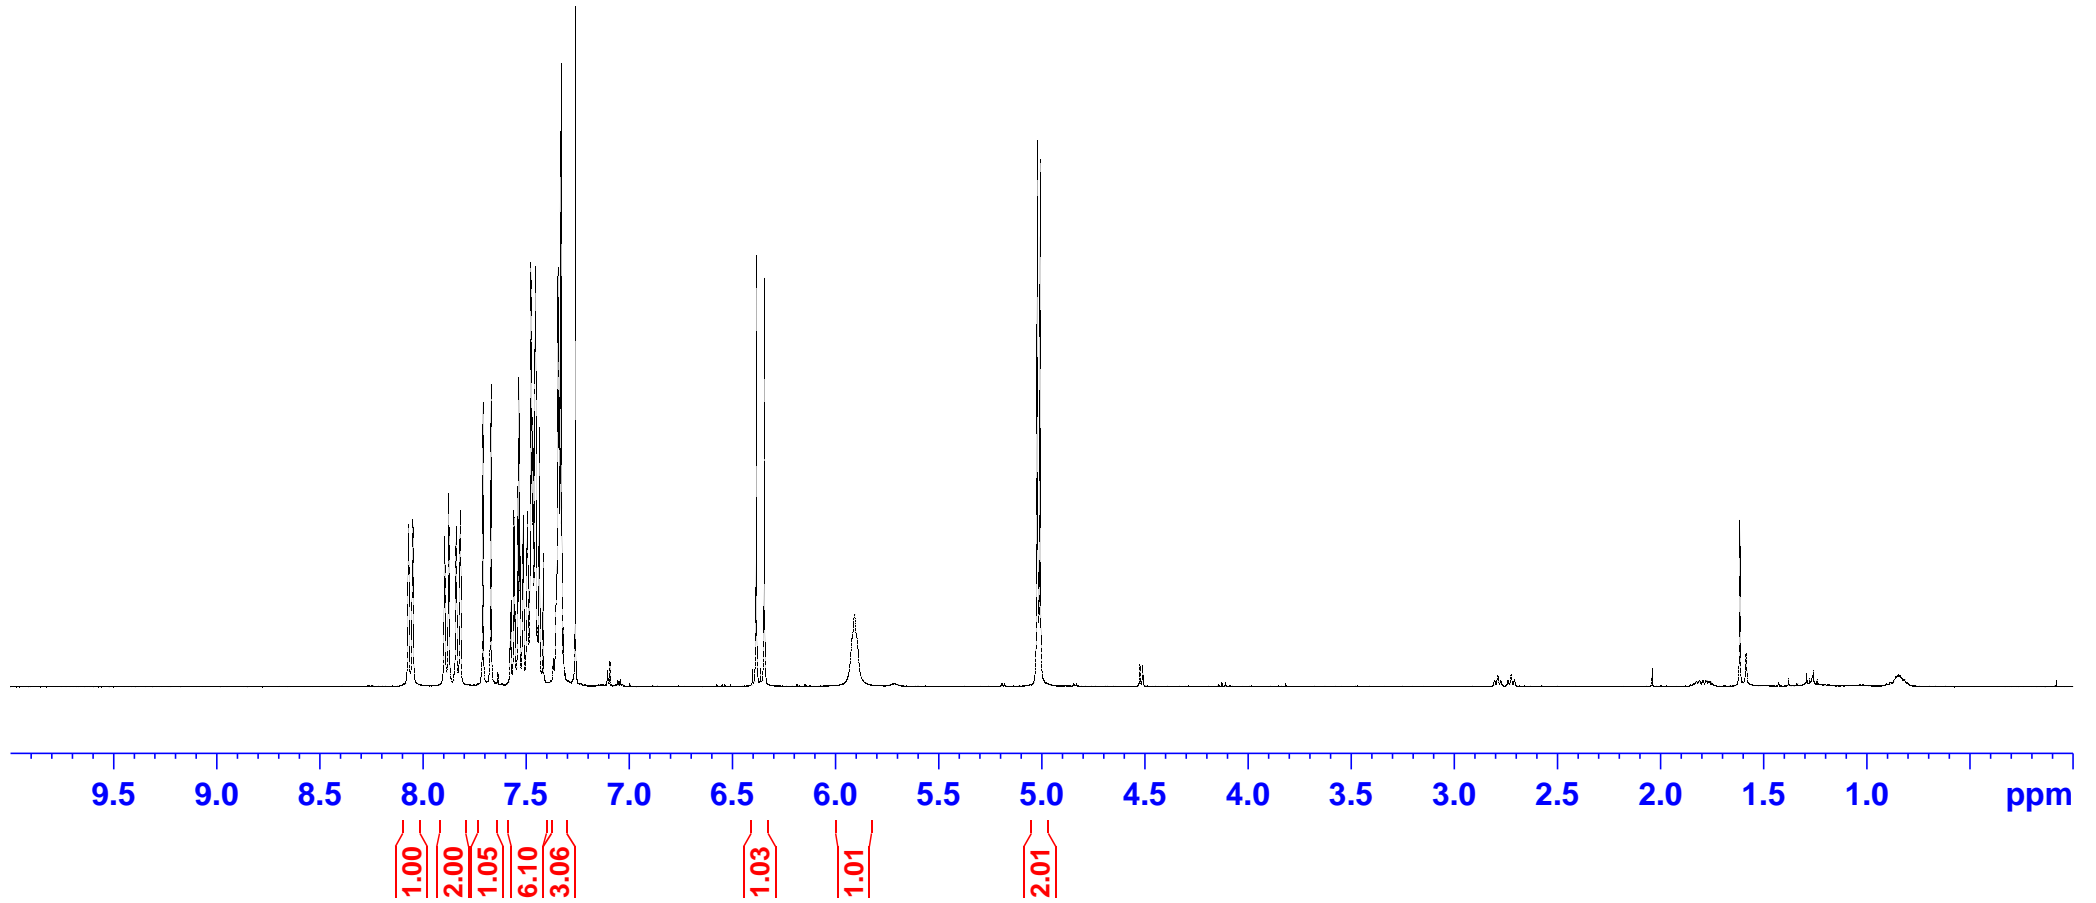

CDC13  
100 MHz

165.63

141.62  
134.89  
134.06  
133.56  
131.60  
129.87  
128.94  
128.91  
127.93  
127.12  
126.91  
126.21  
125.57  
123.73  
120.44

42.22

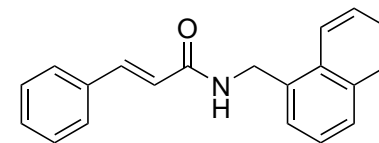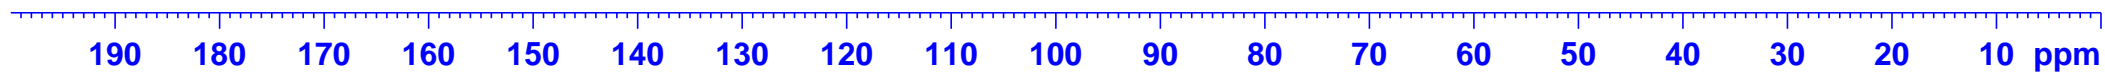

7.650  
7.634  
7.444  
7.429  
7.353  
7.337  
7.126  
7.095  
7.056  
7.042  
7.024  
7.013  
6.993  
6.979  
6.962  
6.861  
6.846  
6.667  
6.636

4.683

2.550

DMSO-d6, 500 MHz  
90C d1=10

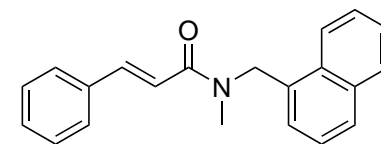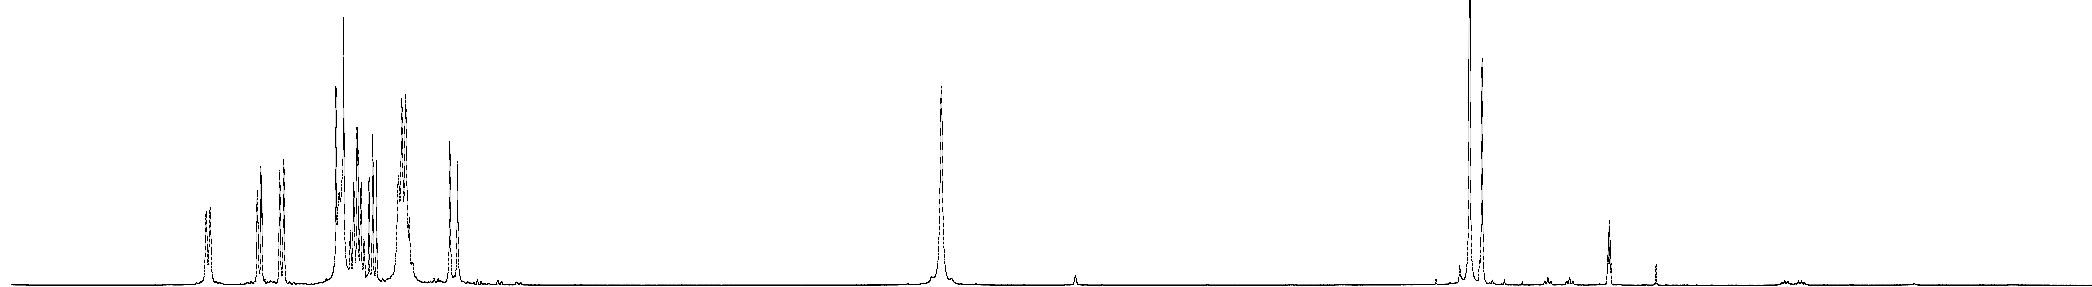

8.0 7.5 7.0 6.5 6.0 5.5 5.0 4.5 4.0 3.5 3.0 2.5 2.0 1.5 1.0 0.5 ppm

0.99  
1.00  
1.00  
6.33  
4.04  
1.05

1.98

3.03

DMSO-d6, 125 MHz  
95C d1=10

165.60

140.90  
134.83  
133.08  
132.55  
130.67  
128.78  
128.12  
128.01  
127.25  
127.19  
125.68  
125.24  
124.83  
122.75  
118.50

48.46

33.83

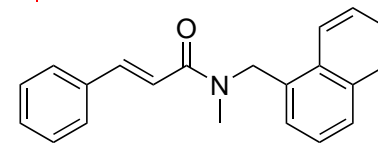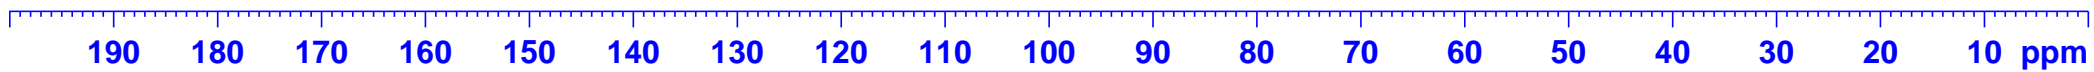

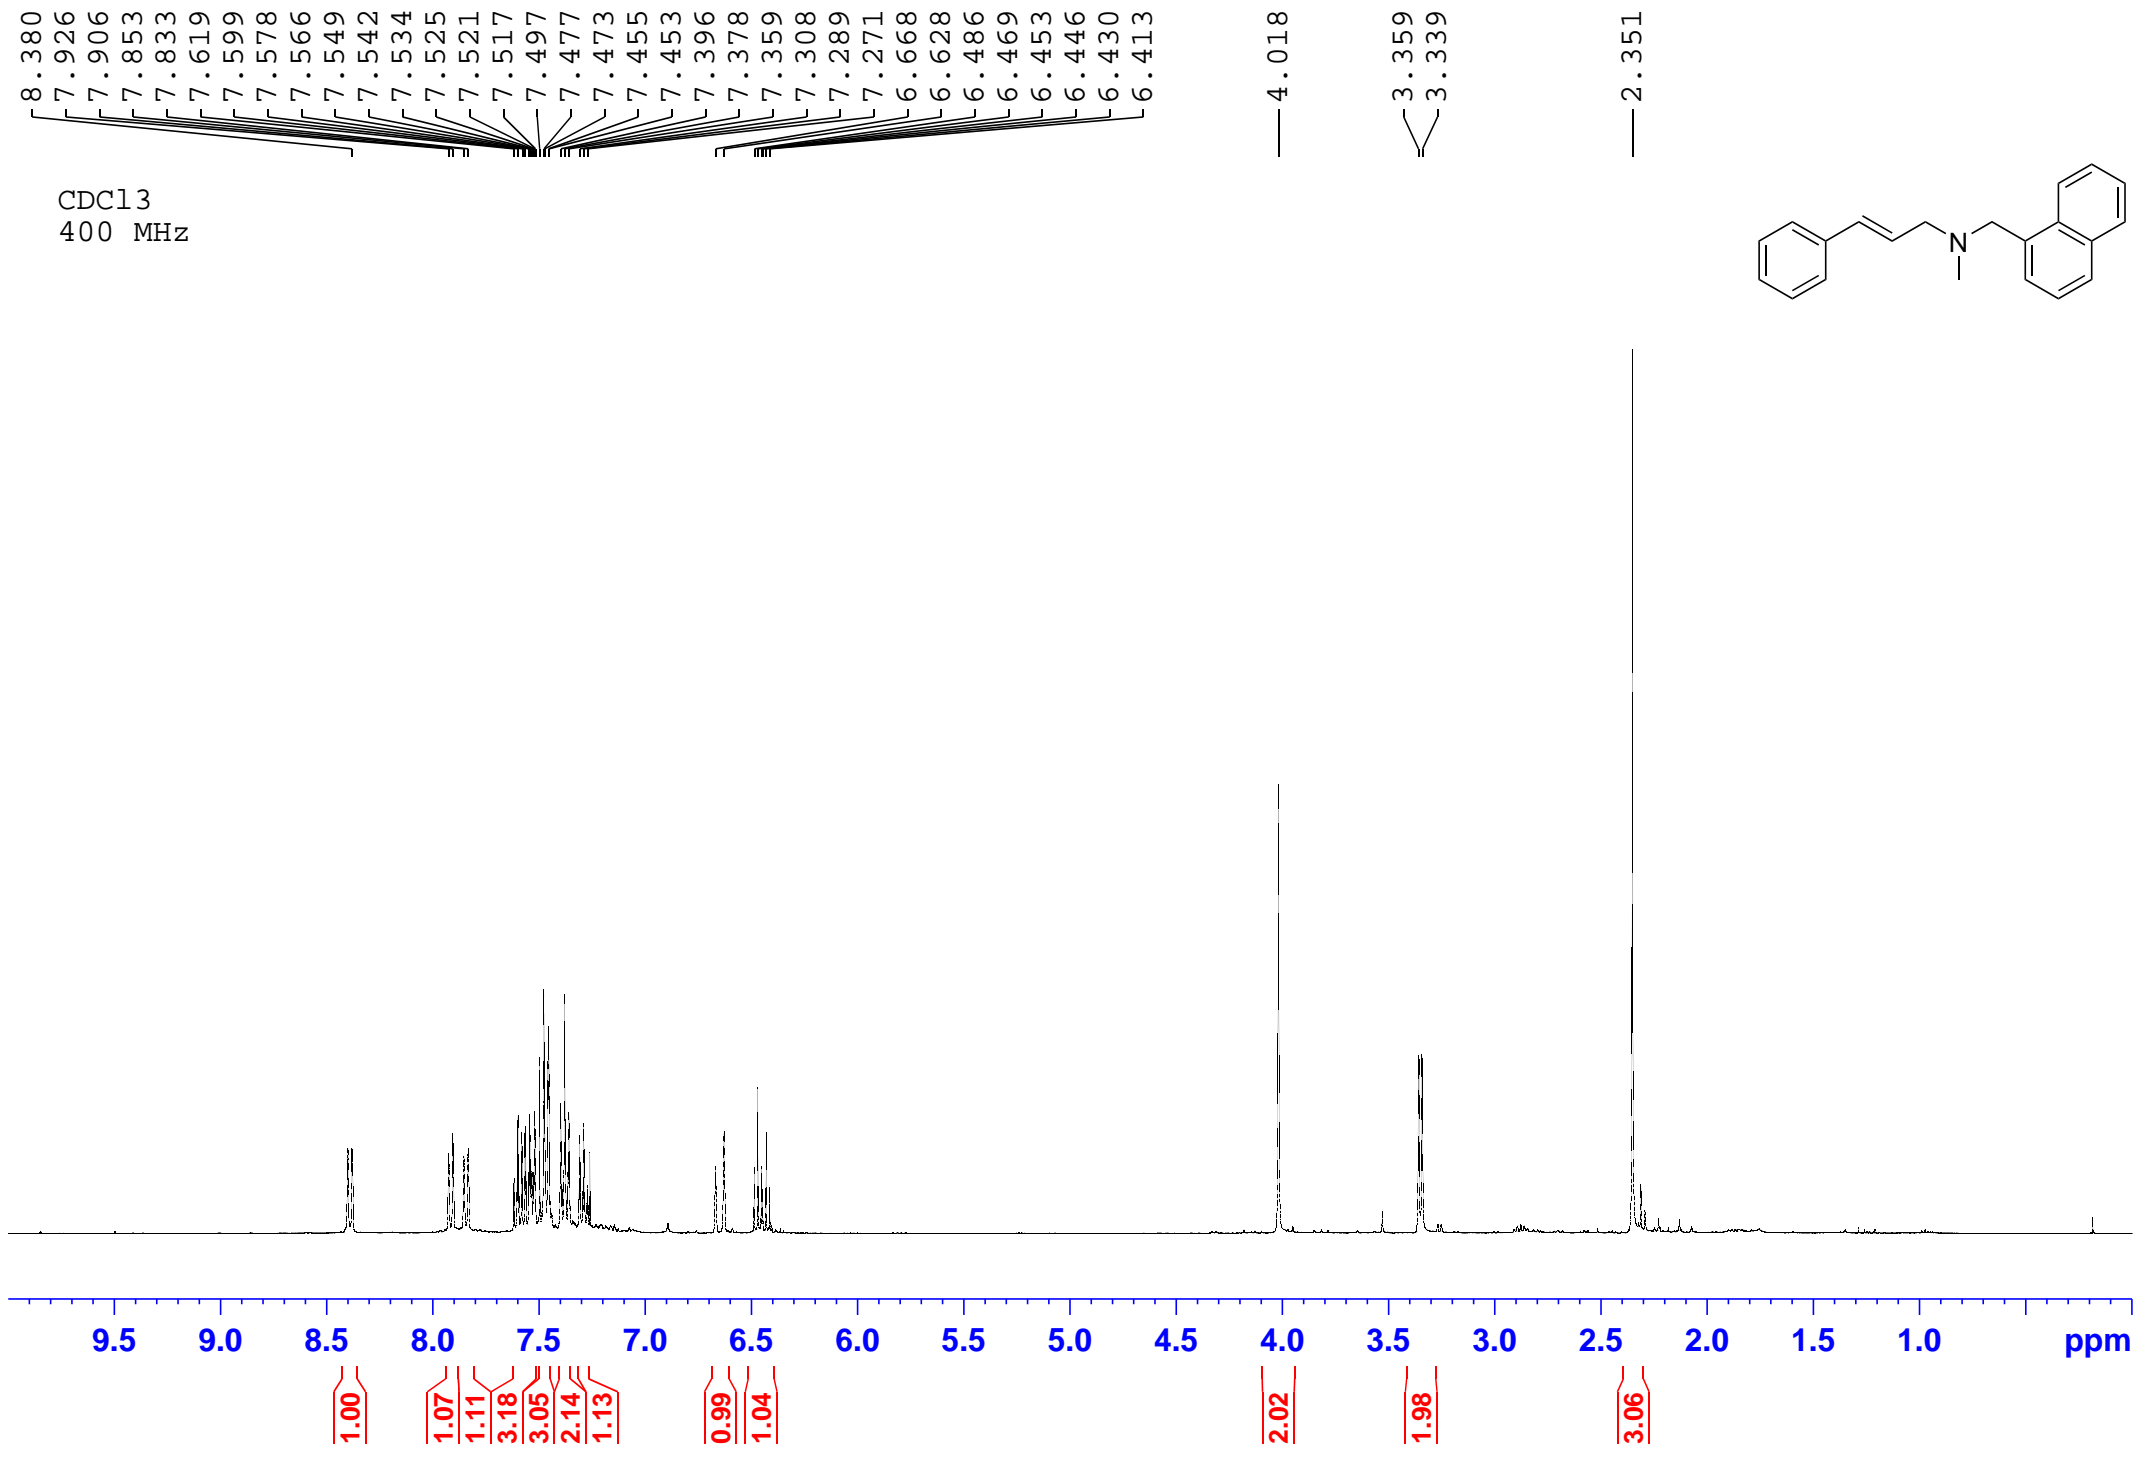



CDCl<sub>3</sub>  
100 MHz

137.26  
135.01  
134.01  
132.76  
132.62  
128.65  
128.55  
128.04  
127.74  
127.54  
127.48  
126.43  
125.99  
125.69  
125.23  
124.76

60.50  
60.23

42.58

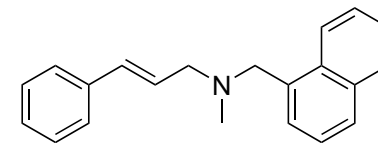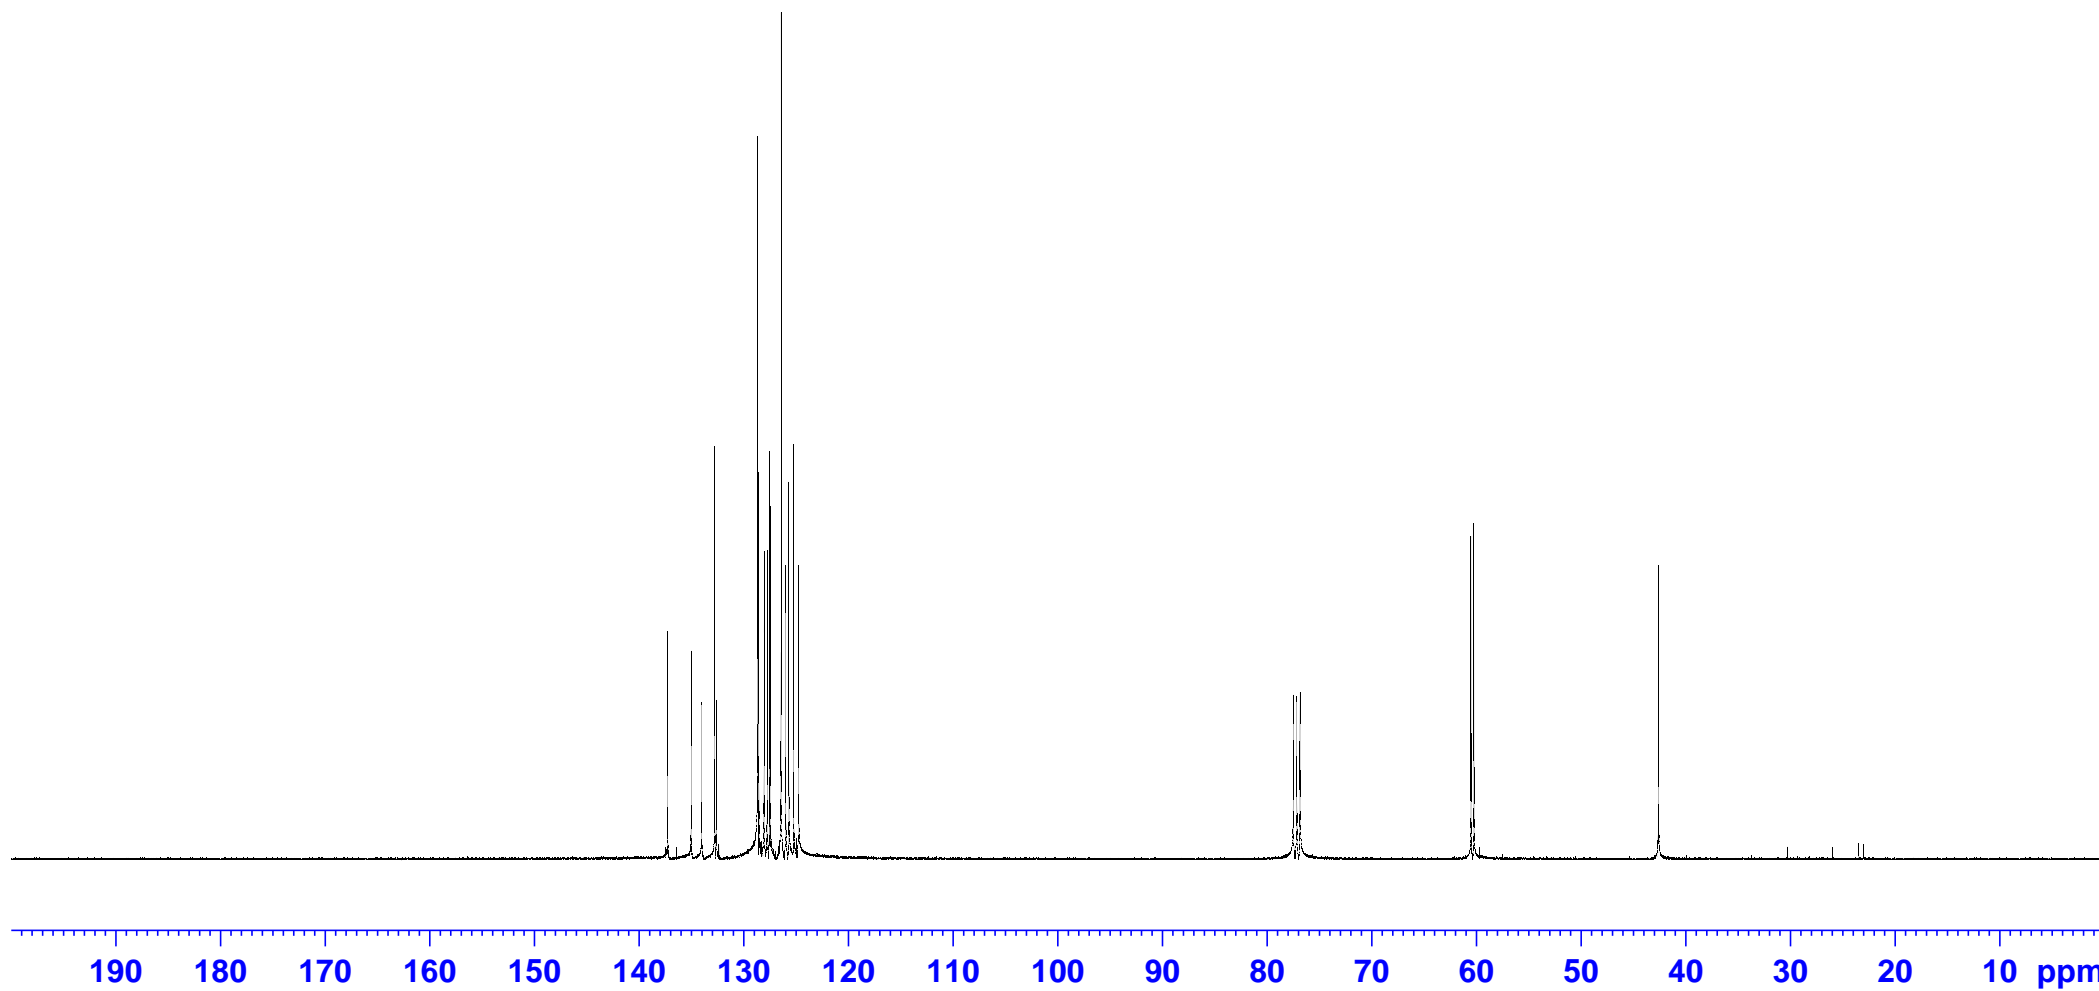

Supplement: c4cc07150f1.pdf [file c4cc07150f1.pdf]
